# Supplementary material for: Trends, geographical variation and factors associated with the use of anti-VEGF intravitreal injections in Portugal (2013–2018): a retrospective analysis of administrative data
Source: PubMed Central journal article supplement — BMJ Open. 2022 Apr 6;12(4):e055478. doi: 10.1136/bmjopen-2021-055478 (PMC8987746; doi:10.1136/bmjopen-2021-055478), 2022-04-06
Supplement: bmjopen-2021-055478.draft_revisions.pdf [file bmjopen-2021-055478.draft_revisions.pdf]

# BMJ Open

BMJ Open is committed to open peer review. As part of this commitment we make the peer review history of every article we publish publicly available.

When an article is published we post the peer reviewers' comments and the authors' responses online. We also post the versions of the paper that were used during peer review. These are the versions that the peer review comments apply to.

The versions of the paper that follow are the versions that were submitted during the peer review process. They are not the versions of record or the final published versions. They should not be cited or distributed as the published version of this manuscript.

BMJ Open is an open access journal and the full, final, typeset and author-corrected version of record of the manuscript is available on our site with no access controls, subscription charges or pay-per-view fees (<http://bmjopen.bmj.com>).

If you have any questions on BMJ Open's open peer review process please email [info.bmjopen@bmj.com](mailto:info.bmjopen@bmj.com)

# BMJ Open

## Anti-VEGF intravitreal injection rates and associated factors in Portugal: A National Study

|                               |                                                                                                                                                                                                                                                                                                                                                                                                                                                                                                                                                                                                                                                                                                                                                                                                                                                                                                                                                                                                                                                    |
|-------------------------------|----------------------------------------------------------------------------------------------------------------------------------------------------------------------------------------------------------------------------------------------------------------------------------------------------------------------------------------------------------------------------------------------------------------------------------------------------------------------------------------------------------------------------------------------------------------------------------------------------------------------------------------------------------------------------------------------------------------------------------------------------------------------------------------------------------------------------------------------------------------------------------------------------------------------------------------------------------------------------------------------------------------------------------------------------|
| Journal:                      | <i>BMJ Open</i>                                                                                                                                                                                                                                                                                                                                                                                                                                                                                                                                                                                                                                                                                                                                                                                                                                                                                                                                                                                                                                    |
| Manuscript ID                 | bmjopen-2021-055478                                                                                                                                                                                                                                                                                                                                                                                                                                                                                                                                                                                                                                                                                                                                                                                                                                                                                                                                                                                                                                |
| Article Type:                 | Original research                                                                                                                                                                                                                                                                                                                                                                                                                                                                                                                                                                                                                                                                                                                                                                                                                                                                                                                                                                                                                                  |
| Date Submitted by the Author: | 14-Jul-2021                                                                                                                                                                                                                                                                                                                                                                                                                                                                                                                                                                                                                                                                                                                                                                                                                                                                                                                                                                                                                                        |
| Complete List of Authors:     | Rocha, João Victor; New University of Lisbon National School of Public Health; New University of Lisbon Comprehensive Health Research Centre National School of Public Health<br>Marques, Ana; New University of Lisbon National School of Public Health; New University of Lisbon Comprehensive Health Research Centre National School of Public Health<br>Macedo, Antonio; Linnaeus University, Medicine and Optometry<br>Afonso-Silva, Marta; HE&OR, Novartis Farma, Produtos Farmacêuticos SA<br>Laires, Pedro; HE&OR, Novartis Farma, Produtos Farmacêuticos SA; New University of Lisbon National School of Public Health<br>Almeida, Ana Sofia; Medical Affairs, Novartis Farma, Produtos Farmacêuticos SA<br>Fernandes, Julieta; Medical Affairs, Novartis Farma, Produtos Farmacêuticos SA<br>Pardal, Marisa; HE&OR, Novartis Farma, Produtos Farmacêuticos SA<br>Santana, Rui; New University of Lisbon National School of Public Health; New University of Lisbon Comprehensive Health Research Centre National School of Public Health |
| Keywords:                     | OPHTHALMOLOGY, PUBLIC HEALTH, Medical retina < OPTHALMOLOGY                                                                                                                                                                                                                                                                                                                                                                                                                                                                                                                                                                                                                                                                                                                                                                                                                                                                                                                                                                                        |
|                               |                                                                                                                                                                                                                                                                                                                                                                                                                                                                                                                                                                                                                                                                                                                                                                                                                                                                                                                                                                                                                                                    |

SCHOLARONE™  
Manuscripts

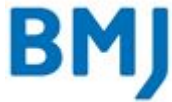

I, the Submitting Author has the right to grant and does grant on behalf of all authors of the Work (as defined in the below author licence), an exclusive licence and/or a non-exclusive licence for contributions from authors who are: i) UK Crown employees; ii) where BMJ has agreed a CC-BY licence shall apply, and/or iii) in accordance with the terms applicable for US Federal Government officers or employees acting as part of their official duties; on a worldwide, perpetual, irrevocable, royalty-free basis to BMJ Publishing Group Ltd ("BMJ") its licensees and where the relevant Journal is co-owned by BMJ to the co-owners of the Journal, to publish the Work in this journal and any other BMJ products and to exploit all rights, as set out in our [licence](#).

The Submitting Author accepts and understands that any supply made under these terms is made by BMJ to the Submitting Author unless you are acting as an employee on behalf of your employer or a postgraduate student of an affiliated institution which is paying any applicable article publishing charge ("APC") for Open Access articles. Where the Submitting Author wishes to make the Work available on an Open Access basis (and intends to pay the relevant APC), the terms of reuse of such Open Access shall be governed by a Creative Commons licence – details of these licences and which [Creative Commons](#) licence will apply to this Work are set out in our licence referred to above.

Other than as permitted in any relevant BMJ Author's Self Archiving Policies, I confirm this Work has not been accepted for publication elsewhere, is not being considered for publication elsewhere and does not duplicate material already published. I confirm all authors consent to publication of this Work and authorise the granting of this licence.

**TITLE PAGE****TITLE:** ANTI-VEGF INTRAVITREAL INJECTION RATES AND ASSOCIATED FACTORS IN PORTUGAL: A NATIONAL STUDY**Authors:** João V Rocha<sup>1,2</sup>, Ana P Marques<sup>1,2</sup>, António F Macedo<sup>3</sup>, Marta Afonso-Silva<sup>4</sup>, Pedro A Laires<sup>1,2</sup>, Ana S Almeida<sup>5</sup>, Julieta Fernandes<sup>5</sup>, Marisa Pardal<sup>4</sup>, Rui Santana<sup>1,2</sup>

1. NOVA National School of Public Health, Public Health Research Centre, Universidade NOVA de Lisboa, Lisbon, Portugal.
2. Comprehensive Health Research Center (CHRC), Lisbon, Portugal.
3. Department of Medicine and Optometry, Linnaeus University, Kalmar, Sweden.
4. HE&OR, Novartis Farma, Produtos Farmacêuticos SA, Porto Salvo, Portugal.
5. Medical Affairs, Novartis Farma, Produtos Farmacêuticos SA, Porto Salvo, Portugal.

**Corresponding author:** João V Rocha ([jv.rocha@ensp.unl.pt](mailto:jv.rocha@ensp.unl.pt))

Av. Padre Cruz, 1600-560 Lisboa, Portugal

**Word count:** 3,105

## ABSTRACT

**Aims:** The arrival of anti-vascular endothelial growth factor (anti-VEGF) therapies represented a treatment shift for several ophthalmologic disorders and led to an increasing number of patients undergoing intravitreal injections. The aims of this observational study were to assess the expansion of anti-VEGF intravitreal injections in the Portuguese National Health System (NHS) and to identify factors correlated with geographic variations in episode rates. **Methods:** Administrative database on discharge from Portuguese NHS hospitals was analysed for annual values and rates of intravitreal anti-VEGF injections at a national and regional level, between 2013 and 2018. **Results:** The number of episodes of anti-VEGF treatment and patients treated increased 16% and 9% per year, respectively, between 2013 and 2018. During the study period around 72% of patients were treated in the Metropolitan areas of Lisbon and Porto and in the Central region. Intravitreal anti-VEGF treatment rates in 2018 were 560 per 100,000 population and presented high variability between municipalities. Higher anti-VEGF treatment rates at the municipality level were associated with shorter distances between their residence and the hospital. At the hospital level, higher ratio of ophthalmologists and higher organizational level were associated with higher anti-VEGF treatment rates. **Conclusion:** The number of episodes and patients treated with anti-VEGF injections has been growing in recent years. Proximity to health care, more access to ophthalmologists, and hospitals with higher organizational levels are associated with higher anti-VEGF treatment rates. Improving access is crucial to reduce regional discrepancies and ensure optimal treatment frequency, which may improve health outcomes.

**Keywords:** Anti-VEGF, Intravitreal injection, Access to eye care, Neovascular age-related macular degeneration, diabetic macular oedema

**Synopsis:** The number of episodes of anti-VEGF injections and treated patients increased between 2013 and 2018 in Portugal. Regional variations in treatment rates were associated with proximity to health care, ophthalmologists supply, and hospitals' organizational levels.

### Article Summary:

#### Strengths and limitations of the study

- Nationwide information on antivasular endothelial growth factor (anti-VEGF) intravitreal injections in the Portuguese NHS between 2013 and 2018.
- Characterization of anti-VEGF intravitreal injections according to diagnostic, geographic distribution, and average number of injections per year per patient.
- Methods employed produced evidence of inequalities in treatment for diseases that can lead to irreversible loss of sight.
- ICD codes and procedures used as a proxy to identify episodes with anti-VEGF.
- Activity in the private health sector was not included in the analysis.

## INTRODUCTION

The availability of anti-vascular endothelial growth factor (anti-VEGF) therapies represented a treatment shift for a range of ophthalmologic disorders, with a dramatic impact on serious conditions that were previously untreatable resulting in irreversible damages and loss of sight [1,2]. Anti-VEGF intravitreal injections act by reducing neovascular progression and were initially approved for the treatment of neovascular age-related macular degeneration (nAMD) [3,4]. Currently, anti-VEGF therapies are indicated for the treatment of a vast number of other ocular diseases such as diabetic macular oedema (DME), choroidal neovascularization (CNV), and retinal vein occlusion (RVO) [2]. Clinical trials have showed that anti-VEGF intravitreal injections prevented vision loss in the majority of patients and, in some cases, significantly improved vision [2,3,5]. The positive impact of anti-VEGF injections in visual outcomes [2,6–8] combined with the lack of previous efficient treatments, led to rapid diffusion of anti-VEGF treatments in many countries [4,6,9,10].

The main barriers for treatment with anti-VEGF are the high costs of the drugs, the need for multiple treatments, and the need for the treatments to be administered by specially trained personnel at hospitals [6,11]. Access is hindered in countries such as the United States [11] and in many Asian countries [6], where the drugs are not reimbursed by the health systems. Even in countries for which anti-VEGF treatments are reimbursed by the health system, such as England, Norway, and Portugal, studies report considerable geographic variation in treatment rates [4,10,12]. The study in Norway showed that the geographic variations in episode rates are challenges to the policy goals regarding equitable access and care, calling for further investigation [4]. The study in Portugal indicated that the number of hospital episodes related with anti-VEGF injections increased from 1,815 in 2001 to 25,106 in 2012, which is a mean annual increase of 32% [10].

In Portugal, Ranibizumab has been reimbursed by the NHS since 2008 [10], and by 2018 Bevacizumab and Aflibercept were also reimbursed [13]. Despite the equity-oriented nature of the Portuguese health system and the low co-payment values, a study covering the 2002-2012 period found unequal geographic distribution in treatment rates across the country [10]. Patients from regions without ophthalmology departments and lower population density received fewer treatments than other regions [10]. More recent estimates on the diffusion of anti-VEGF intravitreal injections are needed to understand how this treatment has expanded with the existence of additional elective pharmaceuticals.

Understanding the trends in anti-VEGF treatments in terms of number of episodes and patients is of great importance for assessing health technologies. Assessing access to and impact of health technologies is paramount in investigating the number of episodes and patients treated. Periodic investigations about access to health technologies is vital to prevent health inequalities and to learn how to proceed if different technologies arise. The aim of this study was twofold: to analyse the expansion of anti-VEGF intravitreal injections in the Portuguese NHS between 2013 and 2018 and to identify factors associated with geographic variation in treatment rates.

## MATERIALS AND METHODS

### Data source and inclusion/exclusion criteria

This observational study used an administrative database on hospital discharges from public hospital institutions in mainland Portugal, which includes information about sex, age, municipality of residence,

principal and secondary diagnosis and procedures, discharge hospital, and a unique patients' identifier from all inpatient and day case episodes. Use of this database was authorized for research purposes by the Portuguese Health System Central Administration (ACSS). The database is anonymized, guaranteeing the confidentiality of individuals, and it was therefore not necessary to obtain patients' consent or approval by an ethics committee for this study.

Episodes related to intravitreal injections with anti-VEGF between 2013 and 2018 were selected according to procedures records coded with International Classification of Diseases (ICD) 9th version- Clinical Modification (ICD-9CM) and ICD 10th version (ICD-10) for episodes registered from 2017. As in previous studies, ICD-9CM procedures codes 1474, 1475, 1479, and 149 and ICD10 procedures codes 3E0C30M and 3E0C3GC were used as proxy to anti-VEGF treatments [10,12]. Note, however, that these codes might also capture intravitreal injections for other drugs such as injectable antibiotics or corticosteroids [10,12].

Subsequently, the criteria for classification and exclusion of episodes were applied to assign a diagnosis for each episode. Episodes with missing data on sex, age, diagnosis and procedures, and discharge hospitals were excluded. ICD-10 bilateral episodes were counted as two injections, while the number of patients was counted as one. The *Supplementary Material- Appendix 1* contains details on the ICD codes used and the criteria to assign a diagnosis for each episode.

## Data analysis

We examined the number of episodes and patients treated by year, by diagnosis, and by region (according to patient's municipality of residence). The number of patients treated per year was estimated using the unique patients' identifier, regardless of whether they were already in treatment in the previous years or if they entered the database in that specific year. Then, using the patient as unit of observation, we computed the average number of injections per year for each diagnosis (nAMD, CNV, DME or RVO). Finally, we proceeded with the investigation of factors associated with geographic variations in anti-VEGF standardized treatment-rates.

Statistical analysis was conducted to investigate factors associated with geographic variations in anti-VEGF standardized treatment-rates. This ecological analysis was performed in two parts: the first had as unit of analysis the municipality of residence of the patient and in the second the unit of analysis was the hospital where the injection was performed. For analysis refinement, only patients aged 50 years or older were included in the analysis of associated factors, as the conditions for which anti-VEGF injections are indicated affects mostly people in this age category [2,12].

For the ecological analysis at the municipality level the rate of episodes related to intravitreal injections with anti-VEGF treatments per 100,000 population was the dependent variable. The independent variables analysed were patients' characteristics (mean age, proportion by sex, mean distance to hospital in kilometres - according to patient's municipality of residence and municipality where the hospital is located), and municipalities' characteristics (purchasing power, number of ophthalmologists per 20,000 persons, and number of ophthalmology consultations per 1,000 persons). The characteristics of the patients were retrieved from the hospital discharge database, and the characteristics of the municipality variables obtained from Statistics Portugal [14]. For the characteristics of patients, municipalities were separated into two categories for each year: "Higher rates" category for the municipalities with episode rates higher than the median and "Lower rates" category for the municipalities with episode rates lower than the median. The Mann-Whitney test was used to compare patients' characteristics according to these two categories. For the

characteristics of the municipalities, associations were analysed according to Spearman's correlation analysis and multivariate linear regression models, with treatment rates as dependent variables and the independent variables (purchasing power, number of ophthalmologists per 20,000 persons, and number of ophthalmology consultations per 1,000 persons) added following the stepwise method.

For the ecological analysis at the hospital level, the dependent variable was the episode rates, and the independent variables were the number of ophthalmologists per 20,000 persons in the hospital's catchment area and the organizational level of the hospital's ophthalmology departments (hospitals' ophthalmology units were divided into three groups, classified according to the general requirements established by the National Network of hospital specialties and referral for Ophthalmology [15], as shown in the *Supplementary Material- Appendix 2*). As these independent variables were not available per year, the years 2013-2018 were collapsed into a single period of analysis. The association with ophthalmologist specialists was analysed using Spearman's correlation analysis. The Kruskal-Wallis test was used to compare the episode rate between the three groups of hospitals. Hospitals in group III have a wider range of health care activities, longer opening hours, and greater equipment availability than hospitals in group II, and the same for group II in relation to group I hospitals. Data on number of ophthalmologists and more details on organizational level of hospitals by groups can be found in the report of the National network of hospital specialty and referral for Ophthalmology [15].

A 5% significance level was adopted. Statistical analysis was performed using the IBM SPSS Statistics v26.

### **Patient and Public Involvement**

Patients or the public were not involved in the design, or conduct, or reporting, or dissemination plans of our research. The study was conducting by analysing hospitalization databases, therefore not possible to involve patients or the public.

## **RESULTS**

### **Evolution, characteristics, and distribution of anti-VEGF treatments**

There were 298,429 episodes of anti-VEGF treatment between 2013 and 2018, and 65,534 patients treated. As illustrated in Figure 1, the number of episodes increased from 30,542 in 2013 to 64,867 in 2018, which corresponds to a mean annual increase of 16%. The number of patients treated in 2013 was 12,951, growing to 19,627 in 2018 (mean annual increase of 9%). In 2018, the anti-VEGF standardized treatment-rate was 560 per 100,000 persons.

Figure 1. Number of hospital episodes of anti-VEGF treatments and patients treated per year, from 2013 to 2018. Portugal

The majority of patients (71%) were treated with intravitreal anti-VEGF in the Metropolitan area of Lisbon, Central region, and Metropolitan area of Porto (Table 1). The Algarve had the lowest proportion of patients treated between 2013 to 2018 (2.6%).

Table 1. Proportion of patients treated with anti-VEGF injections, between 2013 and 2018, per year, Portugal



| Region                      | 2013   | 2014   | 2015   | 2016   | 2017   | 2018   | Total  |
|-----------------------------|--------|--------|--------|--------|--------|--------|--------|
| Alentejo                    | 6.32%  | 6.46%  | 6.74%  | 7.51%  | 6.88%  | 7.54%  | 7.53%  |
| Algarve                     | 2.03%  | 1.97%  | 1.99%  | 2.71%  | 3.33%  | 3.21%  | 2.58%  |
| Metropolitan area of Lisbon | 23.72% | 23.03% | 23.59% | 23.50% | 23.96% | 23.64% | 24.32% |
| Metropolitan area of Porto  | 24.70% | 25.34% | 24.41% | 22.68% | 27.30% | 26.81% | 23.44% |
| Central region              | 25.73% | 24.77% | 25.39% | 25.39% | 17.22% | 18.35% | 23.69% |
| Northern region             | 17.50% | 18.44% | 17.88% | 18.20% | 21.31% | 20.46% | 18.43% |

As summarized in Table 2, the most common diagnosis was nAMD, followed by DME and RVO. These three diagnoses accounted for 70% of episodes. nAMD was the most common condition in every year analysed, except 2016, when DME was the most common.

Table 2. Total episodes of anti-VEGF between 2013 and 2018, by diagnosis and year, Portugal

| Diagnosis                                           | Total          |            |              | 2013          |            | 2014          |            | 2015          |            | 2016          |            | 2017          |            | 2018          |            |
|-----------------------------------------------------|----------------|------------|--------------|---------------|------------|---------------|------------|---------------|------------|---------------|------------|---------------|------------|---------------|------------|
|                                                     | N              | %          | % cumulative | N             | %          | N             | %          | N             | %          | N             | %          | N             | %          | N             | %          |
| Neovascular age-related macular degeneration (nAMD) | 100,168        | 33.57      | 33.57        | 11,575        | 37.90      | 13,415        | 36.32      | 16,357        | 33.60      | 16,094        | 28.95      | 20,857        | 33.74      | 21,87         | 33.72      |
| Diabetic macular edema (DME)                        | 85,997         | 28.82      | 62.38        | 6,578         | 21.54      | 8,044         | 21.78      | 13,371        | 27.47      | 18,181        | 32.70      | 19,769        | 31.98      | 20,054        | 30.92      |
| Retinal vein occlusion (RVO)                        | 18,716         | 6.27       | 68.65        | 1,451         | 4.75       | 2,104         | 5.70       | 2,841         | 5.84       | 3,500         | 6.30       | 3,956         | 6.40       | 4,864         | 7.50       |
| Unspecified macular degeneration                    | 16,042         | 5.38       | 74.03        | 1,750         | 5.73       | 1,862         | 5.04       | 2,712         | 5.57       | 3,979         | 7.16       | 2,724         | 4.41       | 3,015         | 4.65       |
| Proliferative diabetic retinopathy                  | 15,737         | 5.27       | 79.30        | 1,846         | 6.04       | 2,297         | 6.22       | 2,726         | 5.60       | 2,144         | 3.86       | 3,250         | 5.26       | 3,474         | 5.36       |
| Choroidal neovascularization (CNV)                  | 13,783         | 4.62       | 83.92        | 1,698         | 5.56       | 2,190         | 5.93       | 2,619         | 5.38       | 3,040         | 5.47       | 2,154         | 3.48       | 2,082         | 3.21       |
| Retinal edema                                       | 12,581         | 4.22       | 88.14        | 1,256         | 4.11       | 1,890         | 5.12       | 1,690         | 3.47       | 1,677         | 3.02       | 2,575         | 4.17       | 3,493         | 5.38       |
| Other diagnosis                                     | 35,405         | 11.86      | 100          | 4,388         | 14.37      | 5,129         | 13.89      | 6,361         | 13.07      | 6,979         | 12.55      | 6,533         | 10.57      | 6,015         | 9.27       |
| <b>Total</b>                                        | <b>298,429</b> | <b>100</b> |              | <b>30,542</b> | <b>100</b> | <b>36,931</b> | <b>100</b> | <b>48,677</b> | <b>100</b> | <b>55,594</b> | <b>100</b> | <b>61,818</b> | <b>100</b> | <b>64,867</b> | <b>100</b> |

Table 3 summarizes the average increase in the number of injections per year per patient, by diagnosis. The highest number of injections per year per patient was for nAMD, which increased from 2.72 in 2013 to 3.37 in 2018. In contrast, CNV had the lowest values, reaching 2.01 injections per year per patient in 2018.

Table 3. Average number of injections per year per patient, by diagnosis, 2013 to 2018, Portugal

| Diagnosis | 2013 | 2014 | 2015 | 2016 | 2017 | 2018 |
|-----------|------|------|------|------|------|------|
| nAMD      | 2.72 | 2.77 | 2.96 | 2.72 | 3.4  | 3.37 |
| DME       | 2.33 | 2.32 | 2.64 | 2.88 | 2.77 | 2.80 |
| CNV       | 1.35 | 1.43 | 1.41 | 1.51 | 2.06 | 2.01 |
| RVO       | 1.88 | 2.08 | 2.25 | 2.38 | 2.42 | 2.48 |

### Factors associated with geographic distribution of anti-VEGF injections

Table 4 shows the comparison of characteristics of patients at the municipality level. In 2016, patients treated with anti-VEGF intravitreal injections who lived in municipalities with episode rates higher than the median (“Higher rates” category) were older. In 2013, municipalities in the “Higher” category had a significantly higher proportion of females. For the distance between municipality of residence and hospital, significant differences were found for all years, with the average distance being shorter for municipalities in the “Higher” category.

Table 4. Mann-Whitney test for individual variables by municipality category

| Year | Age                           |                               |              |              | Sex (proportion of men)        |                                |              |              | Distance in Kilometres         |                                |              |                  |
|------|-------------------------------|-------------------------------|--------------|--------------|--------------------------------|--------------------------------|--------------|--------------|--------------------------------|--------------------------------|--------------|------------------|
|      | Mean (standard deviation)     |                               | U            | signif.      | Mean (standard deviation)      |                                | U            | signif.      | Mean (standard deviation)      |                                | U            | signif.          |
|      | Lower rates                   | Higher rates                  |              |              | Lower rates                    | Higher rates                   |              |              | Lower rates                    | Higher rates                   |              |                  |
| 2013 | 70.70<br>(4.64)               | 71.43<br>(2.65)               | 8737         | 0.168        | <b>0.511</b><br><b>(0.214)</b> | <b>0.465</b><br><b>(0.130)</b> | <b>8256*</b> | <b>0.036</b> | <b>88.50</b><br><b>(50.25)</b> | <b>46.13</b><br><b>(30.58)</b> | <b>4187*</b> | <b>&lt;0.001</b> |
| 2014 | 70.90<br>(4.50)               | 71.02<br>(2.64)               | 9466         | 0.772        | 0.499<br>(0.198)               | 0.486<br>(0.121)               | 9025         | 0.343        | <b>84.11</b><br><b>(52.25)</b> | <b>46.08</b><br><b>(32.22)</b> | <b>4835*</b> | <b>&lt;0.001</b> |
| 2015 | 70.62<br>(4.07)               | 71.35<br>(2.92)               | 8553         | 0.098        | 0.519<br>(0.179)               | 0.486<br>(0.110)               | 8484         | 0.079        | <b>81.04</b><br><b>(51.11)</b> | <b>42.62</b><br><b>(25.65)</b> | <b>4701*</b> | <b>&lt;0.001</b> |
| 2016 | <b>70.58</b><br><b>(3.71)</b> | <b>71.61</b><br><b>(2.62)</b> | <b>7656*</b> | <b>0.004</b> | 0.500<br>(0.169)               | 0.503<br>(0.099)               | 9218         | 0.576        | <b>73.52</b><br><b>(49.44)</b> | <b>40.99</b><br><b>(28.36)</b> | <b>5098*</b> | <b>&lt;0.001</b> |
| 2017 | 72.30<br>(5.37)               | 71.66<br>(2.71)               | 7826         | 0.135        | 0.480<br>(0.244)               | 0.511<br>(0.127)               | 7989         | 0.218        | <b>69.69</b><br><b>(53.74)</b> | <b>41.89</b><br><b>(32.51)</b> | <b>6238*</b> | <b>&lt;0.001</b> |
| 2018 | 72.26<br>(4.70)               | 72.02<br>(2.56)               | 8553         | 0.449        | 0.523<br>(0.233)               | 0.484<br>(0.107)               | 8246         | 0.216        | <b>82.88</b><br><b>(72.94)</b> | <b>66.42</b><br><b>(65.37)</b> | <b>7586*</b> | <b>0.002</b>     |

In the bivariate correlation analysis of the rate of anti-VEGF treatments with the independent ecological variables, a positive correlation was found for: purchasing power in the years 2016 (p-value <0.001) and 2018 (p-value <0.001); rate of ophthalmologists in 2015 (p-value = 0.042) and 2016 (p-value = 0.016); ophthalmology consultations in all hospitals in 2013 (p-value = 0.047) and 2016 (p-value = 0.018), and consultations in public hospitals in 2013 (p-value = 0.040) and in 2016 (p-value = 0.030).

Stepwise linear regression models were generated for each year. Between 2013 and 2015 the variable ophthalmology consultations was included with a positive coefficient. For 2016 to 2018, the variable that remained in the model was purchasing power, with a positive coefficient. The models had low adjusted R<sup>2</sup>

(the highest was 0.043 in 2018) and the analysis of residues was inconclusive regarding the quality of the models.

In the ecological analysis at the hospital level, the bivariate Spearman's correlation between the rate of anti-VEGF treatments between 2013 and 2018 and the ratio of ophthalmologists had a positive correlation ( $\rho = 0,359$ ;  $n = 40$ ;  $p$ -value = 0.023). The Kruskal-Wallis test showed a statistically significant difference in episode rates with anti-VEGF according to the hospital's organizational level ( $H(2) = 7.054$ ;  $p$ -value = 0.029). More specifically, the results indicate that hospitals in group III had a higher episode rate than hospitals in group II. These, in turn, had higher episode rates than group I hospitals.

## DISCUSSION

The aim of this study was to analyse the expansion of anti-VEGF intravitreal treatments in the Portuguese NHS and to identify factors associated with geographic variations. Results indicate that access to treatment with anti-VEGF injection has been increasing in Portugal, and that they were first used to treat nAMD, followed by DME, CNV, and RVO. An increase in the number of injections per patient per year was observed for all diagnoses. More than half of the episodes with anti-VEGF were recorded in the metropolitan areas of Lisbon and Porto.

Given the positive impact of anti-VEGF injections on health outcomes for many ocular neovascular diseases, the expansion in injections performed and patients treated seems justified. The evolution of anti-VEGF treatments found from 2013 to 2018 was consistent with values reported by Marques et al. [10] from 2002 to 2012. The total number of injections per year in Portugal varied from less than 2,000 to over 60,000 in 16 years. As anti-VEGF injections are covered by the Portuguese NHS [10,13,16] and are safe and highly effective [17], there are reasons to expect that this upward tendency will continue to be observed in the coming years.

Neovascular AMD and DME diagnosis corresponded to 63% of episodes associated with anti-VEGF treatment between 2013 and 2018. An analysis of the literature revealed that AMD was the eye pathology most often addressed in scientific publications between 2013 and 2018 [18], and it was the most common condition for which anti-VEGF intravitreal injections were used in countries like England [12], Norway [4], and the United States [19].

The number of injections per year per patient for nAMD increased within the period analysed, reaching 3.37 injections per year in 2018. The on-label treatment guidelines for treatment of nAMD for both Ranibizumab and Aflibercept supported monthly injections in the first three months followed by treat and extend regimen (flexible, according to the needs of the patient) [20,21]. Therefore, in a first year of treatment, it would correspond to between 6 to 12 injections (due to loading dose), while in the second year and thereafter it would correspond to 4 to 12 injections. Although there was no information on which drug was used to treat the patients analysed, the values of the on-label standards are greater than what was observed in this study. This low frequency of injections per year was also found in Portugal before 2013 [10], England (2.7 in 2008) [12], and Norway (4.1 in 2015) [4]. On the one hand, these results may indicate difficulties to access the treatment, leaving patients undertreated [22–25]. On the other hand, some clinical studies indicate that variable frequency of anti-VEGF injections is also effective in the treatment of nAMD, and therefore this flexible regimen may have been increasingly adopted [1,26].

1  
2  
3 The geographic variations in episode rates in Portugal observed between 2002 and 2012 were associated  
4 with the availability of anti-VEGF therapies and ophthalmology services, as well as population density  
5 [10]. These results indicate that patients from distant cities or rural areas may have delayed access to  
6 treatments and were more likely to miss follow-up appointments [10]. The findings for the period from  
7 2013 to 2018 corroborate this possibility, as the distance between municipality of residence and hospital  
8 was significantly different between municipalities with higher and lower episode rates. A systematic review  
9 of factors associated with non-adherence to anti-VEGF treatment has also identified greater distance to  
10 hospital as a potential contributing factor [27]. Lower numbers of ophthalmologist and consultations were  
11 also associated with lower episode rates.  
12  
13

14  
15 Similar results were found in Norway [4] and England [12]. National rates of intravitreal injections in  
16 England had a 50-fold variation in age-standardized rates between regions [12]. In Norway, the age adjusted  
17 number of episodes across counties varied from 19 to 55 per 1,000 persons aged 50 years or older [4]. These  
18 studies demonstrated challenges associated with the arrival of this treatment that include frequent and long-  
19 term administration and high allocation of resources. Despite the effort to guarantee geographical equity of  
20 access afforded by the health systems in England, Norway, and Portugal, the variations in anti-VEGF rates  
21 indicate that challenges remain.  
22  
23

24 Because anti-VEGF drugs are injected directly into the vitreous body, there are requirements for use of this  
25 treatment that can include specialized training and the setting up of a location dedicated to injection [28].  
26 These requirements might be difficult to achieve in small hospitals due to financial or technical limitations  
27 [10]. The results showed significant differences in anti-VEGF treatment rates between hospitals, according  
28 to the number of specialists and their organizational level.  
29  
30

31 The present study has found that despite the considerable expansion of anti-VEGF treatments between 2013  
32 and 2018 in Portugal, geographic variations still remain. Although the methodology chosen did not produce  
33 robust evidence to accurately identify the reasons behind these variations, there are strong indications that  
34 barriers previously discussed by Marques et al [10] and also observed in England [12] and Norway [4] are  
35 possibly a root cause, and in any event remain a challenge.  
36  
37

38 Strengths of this study reside in the use of nationwide information and long period of analysis. The  
39 geographical and temporal analysis performed produced important results to monitor the diffusion of anti-  
40 VEGF treatments in Portugal, while raising awareness of persisting inequalities. The statistical methods  
41 employed allowed the identification of factors that should be addressed to ensure the treatment of patients  
42 with ophthalmologic needs. However, there are also limitations associated with its use that are important  
43 to mention. The procedures and ICD codes were used as a proxy to identify episodes with anti-VEGF and  
44 the associated diagnosis, since there are no further details about the intravitreal injection such as the drugs  
45 used in each episode. Thus, it is possible that in some cases anti-VEGF have not been administered,  
46 overestimating the findings reported herein. Future studies may collect more accurate information on  
47 episodes to ensure correspondence to anti-VEGF intravitreal injections.  
48  
49

50 Because the database includes activities carried out only in the public sphere in mainland Portugal,  
51 procedures carried out in private institutions and with an out-of-pocket scheme, or in the Azores and  
52 Madeira are excluded. At the time of analysis, data for 2017 and 2018 were provisional, as two hospitals  
53 had underreported information.  
54

## 55 CONCLUSION

56  
57  
58  
59  
60

1  
2  
3 The development of anti-VEGF drugs has brought effective treatment for retinal diseases that can lead to  
4 severe visual impairment. This study shows that the number of episodes related to anti-VEGF treatment as  
5 well as the number of treated patients increased between 2013 and 2018. However, the distribution of  
6 treatment with anti-VEGF showed regional asymmetries. Factors such as proximity to health care, greater  
7 access to ophthalmologists and hospitals having ophthalmologic departments with more human resources,  
8 more equipment, and higher differentiation level were associated with higher rates of anti-VEGF treatment.  
9 Improving access to treatment is crucial to address the regional discrepancies found and to ensure that  
10 treatment follows patients' clinical needs and enhances better health outcomes. The increasing number of  
11 treatment episodes related to anti-VEGF, the low number of injections per patient per year, and the regional  
12 discrepancies detected impose challenges to the NHS in terms of budget and access. Given the ageing of  
13 the population and the fact that more anti-VEGF drugs have been developed and approved, both demand  
14 and supply of these treatments are likely to increase.  
15  
16  
17

## 18 **DECLARATIONS**

### 19 **Author's contribution**

20 APM, MAS, PAL, RS conceived and designed the study. JVR, APM had full access to the data and  
21 conducted initial analysis. JVR, APM, MAS, ASA, JF conducted the analysis and interpreted the results.  
22 AFM, PAL advised on interpretation of the results. JVR, MP drafted the manuscript. AFM, ASA, JF  
23 participated in the discussions and provided the clinical feedback. MAS, RS provided critical feedback to  
24 the manuscript. All the authors revised the manuscript for important intellectual content, contributed to the  
25 data interpretation and writing, and critically reviewed the manuscript at all stages and approved the final  
26 copy.  
27  
28  
29  
30

### 31 **Patient consent for publication**

32 Obtaining informed consent was not required under national regulations because the patient data were  
33 anonymized.  
34  
35

### 36 **Ethics approval statement**

37 Obtaining approval by an ethics board was not required under national regulations because the patient data  
38 were anonymized.  
39  
40

### 41 **Data sharing statement**

42 The data of hospitalizations are the property of Central Administration of the Health System (Administração  
43 Central do Sistema de Saúde (ACSS), I.P.). However the data are available from the authors upon request  
44 and with permission of the ACSS. The data of hospitalizations are not publicly available, however the  
45 authors confirm that interested researchers can ask for access to these data by contacting ACSS directly at  
46 the following: Parque da Saúde da Lisboa, Edifício 16, Avenida do Brasil, 53 1700-063 Lisboa, Portugal  
47 (e-mail: [geral@acss.min-saude.pt](mailto:geral@acss.min-saude.pt)).  
48  
49  
50

### 51 **Competing interests statement**

52 M Afonso-Silva, P A. Laires, A S. Almeida, J Fernandes, and M Pardal are employees of Novartis Farma,  
53 Produtos Farmacêuticos SA, Porto Salvo, Portugal.  
54  
55  
56  
57  
58  
59  
60



## Funding

This analysis was funded by Novartis Farma, Produtos Farmacêuticos SA- No grant number.

## Acknowledgements

We acknowledge the Central Administration of the Health System for providing the hospital morbidity database.

## REFERENCES

1. Khanna S, Komati R, Eichenbaum DA, Hariprasad I, Ciulla TA, Hariprasad SM. Current and upcoming anti-VEGF therapies and dosing strategies for the treatment of neovascular AMD: A comparative review. *BMJ Open Ophthalmology*. 2019.
2. Tah V, Orlans HO, Hyer J, Casswell E, Din N, Sri Shanmuganathan V, et al. Anti-VEGF therapy and the retina: An update. *Journal of Ophthalmology*. 2015.
3. Lim LS, Mitchell P, Seddon JM, Holz FG, Wong TY. Age-related macular degeneration. *Lancet*. 2012;
4. Kristiansen IS, Haugli Bråten R, Jørstad ØK, Moe MC, Sæther EM. Intravitreal therapy for retinal diseases in Norway 2011–2015. *Acta Ophthalmol*. 2020;
5. Gemenetzi M, Patel PJ. A Systematic Review of the Treat and Extend Treatment Regimen with Anti-VEGF Agents for Neovascular Age-Related Macular Degeneration. *Ophthalmology and Therapy*. 2017.
6. Lai TYY, Cheung CMG, Mieler WF. Ophthalmic application of anti-VEGF therapy. *Asia-Pacific Journal of Ophthalmology*. 2017.
7. Rofagha S, Bhisitkul RB, Boyer DS, Sadda SR, Zhang K. Seven-year outcomes in ranibizumab-treated patients in ANCHOR, MARINA, and HORIZON: A multicenter cohort study (SEVEN-UP). *Ophthalmology*. 2013;
8. Bressler NM, Chang TS, Suñer IJ, Fine JT, Dolan CM, Ward J, et al. Vision-Related Function after Ranibizumab Treatment by Better- or Worse-Seeing Eye. *Clinical Trial Results from MARINA and ANCHOR*. *Ophthalmology*. 2010;
9. Stein JD, Hanrahan BW, Comer GM, Sloan FA. Diffusion of technologies for the care of older adults with exudative age-related macular degeneration. *Am J Ophthalmol*. 2013;
10. Marques AP, Macedo AF, Perelman J, Aguiar P, Rocha-Sousa A, Santana R. Diffusion of anti-VEGF injections in the Portuguese National Health System. *BMJ Open*. 2015;
11. Erie JC, Barkmeier AJ, Hodge DO, Mahr MA. High Variation of Intravitreal Injection Rates and Medicare Anti-Vascular Endothelial Growth Factor Payments per Injection in the United States. *Ophthalmology*. 2016;
12. Keenan TDL, Wotton CJ, Goldacre MJ. Trends over time and geographical variation in rates of intravitreal injections in England. *Br J Ophthalmol*. 2012;
13. Administração Central do Sistema de Saúde, INFARMED, Serviços Partilhados do Ministério da Saúde. Circular informativa conjunta N° 8/2016/ACSS/INFARMED/SPMS [Internet]. 2016 [cited 2020 Dec 3]. Available from: [http://www2.acss.min-saude.pt/Portals/0/Circular conjunta 08\\_SPMS\\_ACSS\\_INFARMED \(2\).pdf](http://www2.acss.min-saude.pt/Portals/0/Circular%20conjunta%2008_SPMS_ACSS_INFARMED%20(2).pdf)
14. Instituto Nacional de Estatística. Estatísticas- População e Sociedade- Saúde [Internet]. [cited 2020 Jun 3]. Available from: [https://www.ine.pt/xportal/xmain?xpgid=ine\\_tema&xpid=INE&tema\\_cod=1117](https://www.ine.pt/xportal/xmain?xpgid=ine_tema&xpid=INE&tema_cod=1117)
15. Serviço Nacional de Saúde. Rede nacional de especialidade hospitalar e de referência de oftalmologia [Internet]. 2016. Available from: [https://www.sns.gov.pt/wp-content/uploads/2016/05/Proposta-RNEHR-Oftalmologia-2016-ACSS-1\\_VFfinal.pdf](https://www.sns.gov.pt/wp-content/uploads/2016/05/Proposta-RNEHR-Oftalmologia-2016-ACSS-1_VFfinal.pdf)
16. INFARMED. Relatório público de avaliação (BEOVU- Brolucizumab) [Internet]. 2021. Available

- 1  
2  
3 from:  
4 <https://www.infarmed.pt/documents/15786/1424140/Relatório+de+avaliação+de+financiamento+público+de+Beovu+%28DCI%3A+brolucizumab%29+2021/02da132e-8bf4-fb93-e744-4f64ed596470>  
5  
6  
7  
8 17. Moisseiev E, Loewenstein A. Abicipar pegol—a novel anti-VEGF therapy with a long duration of  
9 action. *Eye* [Internet]. 2020 Apr 19;34(4):605–6. Available from:  
10 <http://www.nature.com/articles/s41433-019-0584-y>  
11  
12 18. Yeung AWK, Abdel-Daim MM, Abushouk AI, Kadonosono K. A literature analysis on anti-  
13 vascular endothelial growth factor therapy (anti-VEGF) using a bibliometric approach. *Naunyn-  
14 Schmiedeberg's Archives of Pharmacology*. 2019.  
15 19. Parikh R, Ross JS, Sangaralingham LR, Adelman RA, Shah ND, Barkmeier AJ. Trends of Anti-  
16 Vascular Endothelial Growth Factor Use in Ophthalmology Among Privately Insured and  
17 Medicare Advantage Patients. *Ophthalmology*. 2017.  
18 20. European Medicines Agency. Eylea [Internet]. 2020. Available from:  
19 [https://www.ema.europa.eu/en/documents/overview/eylea-epar-medicine-overview\\_en.pdf](https://www.ema.europa.eu/en/documents/overview/eylea-epar-medicine-overview_en.pdf)  
20 21. European Medicines Agency. Lucentis [Internet]. 2018. Available from:  
21 [https://www.ema.europa.eu/en/documents/overview/lucentis-epar-medicine-overview\\_en.pdf](https://www.ema.europa.eu/en/documents/overview/lucentis-epar-medicine-overview_en.pdf)  
22 22. Holekamp NM, Liu Y, Yeh WS, Chia Y, Kiss S, Almony A, et al. Clinical utilization of anti-  
23 VEGF agents and disease monitoring in neovascular age-related macular degeneration. *Am J  
24 Ophthalmol*. 2014;  
25 23. Monés J, Singh RP, Bandello F, Souied E, Liu X, Gale R. Undertreatment of Neovascular Age-  
26 Related Macular Degeneration after 10 Years of Anti-Vascular Endothelial Growth Factor  
27 Therapy in the Real World: The Need for A Change of Mindset. *Ophthalmologica*. 2020;  
28 24. Holz FG, Tadayoni R, Beatty S, Berger A, Cereda MG, Cortez R, et al. Multi-country real-life  
29 experience of anti-vascular endothelial growth factor therapy for wet age-related macular  
30 degeneration. *Br J Ophthalmol*. 2015;  
31 25. Ciulla TA, Hussain RM, Pollack JS, Williams DF. Visual Acuity Outcomes and Anti-Vascular  
32 Endothelial Growth Factor Therapy Intensity in Neovascular Age-Related Macular Degeneration  
33 Patients. *Ophthalmol Retin* [Internet]. 2020 Jan;4(1):19–30. Available from:  
34 <https://linkinghub.elsevier.com/retrieve/pii/S2468653019302805>  
35 26. Holz FG, Amoaku W, Donate J, Guymer RH, Kellner U, Schlingemann RO, et al. Safety and  
36 efficacy of a flexible dosing regimen of ranibizumab in neovascular age-related macular  
37 degeneration: The SUSTAIN study. *Ophthalmology*. 2011;  
38 27. Ehlken C, Ziemssen F, Eter N, Lanzl I, Kaymak H, Lommatzsch A, et al. Systematic review: non-  
39 adherence and non-persistence in intravitreal treatment. *Graefe's Archive for Clinical and  
40 Experimental Ophthalmology*. 2020.  
41 28. Michels S, Becker M, Wachtlin J, Binder S. The intravitreal injection: Variations in regulations,  
42 cost and reimbursement in Europe. *Spektrum der Augenheilkd*. 2012;(26):2–6.  
43  
44  
45  
46  
47  
48  
49  
50  
51  
52  
53  
54  
55  
56  
57  
58  
59  
60



1  
2  
3  
4  
5  
6  
7  
8  
9  
10  
11  
12  
13  
14  
15  
16  
17  
18  
19  
20  
21  
22  
23  
24  
25  
26  
27  
28  
29  
30  
31  
32  
33  
34  
35  
36  
37  
38  
39  
40  
41  
42  
43  
44  
45  
46  
47  
48  
49  
50  
51  
52  
53  
54  
55  
56  
57  
58  
59  
60

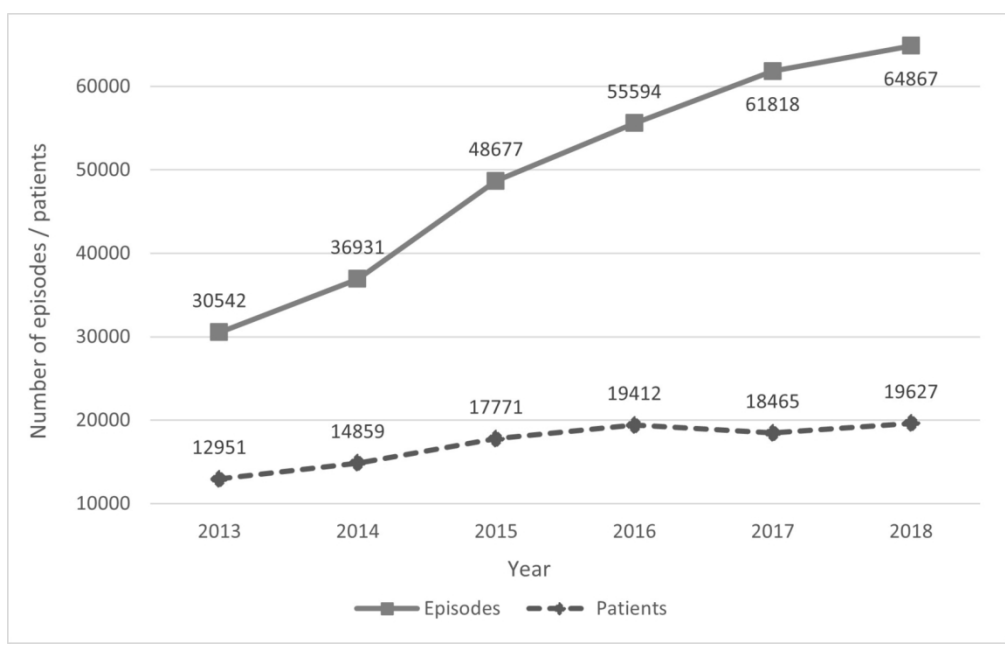

Figure 1. Number of hospital episodes of anti-VEGF treatments and patients treated per year, from 2013 to 2018. Portugal

147x92mm (300 x 300 DPI)

## Appendix 1

Table 1. ICD Procedure codes used to select episodes related to intravitreal injections with anti-VEGF

| ICD version | Code    | Denomination                                                                |
|-------------|---------|-----------------------------------------------------------------------------|
| ICD-9       | 1474    | Other mechanical vitrectomy                                                 |
| ICD-9       | 1475    | Injection of vitreous substitute                                            |
| ICD-9       | 1479    | Other operations on vitreous                                                |
| ICD-9       | 149     | Other operations on retina, choroid and posterior chamber                   |
| ICD-10      | 3E0C30M | Introduction of monoclonal antibody into eye, percutaneous approach),       |
| ICD-10      | 3E0C3GC | Introduction of other therapeutic substance into eye, percutaneous approach |

### IDENTIFICATION OF INTRAVITREAL ANTI-VEGF TREATMENT EVENTS FOR ICD-9

#### 1. Main indications

##### Indication: DIABETIC MACULAR EDEMA (DME)

Numerator: Discharges, with either:

- A principal diagnosis code for Diabetic Macular Edema (**DIMAED**) or
- A principal diagnosis code for Other Relevant Conditions (**OTRECO**) and any secondary diagnosis codes for Diabetic Macular Edema (**DIMAED**).

##### Indication: RETINAL VEIN OCCLUSION (RVO)

##### Indication: RETINAL VEIN OCCLUSION (CENTRAL)

Numerator: Discharges, with either:

- A principal diagnosis code for Retinal Vein Occlusion- Central (**RVOCEN**) or
- A principal diagnosis code for Other Relevant Conditions (**OTRECO**) and any secondary diagnosis codes for Retinal Vein Occlusion- Central (**RVOCEN**).

##### Indication: RETINAL VEIN OCCLUSION (BRANCH)

Numerator: Discharges, with either:

- A principal diagnosis code for Retinal Vein Occlusion- Branch (**RVOBRA**) or
- A principal diagnosis code for Other Relevant Conditions (**OTRECO**) and any secondary diagnosis codes for Retinal Vein Occlusion- Branch (**RVOBRA**).

##### Indication: NEOVASCULAR AGE-RELATED MACULAR DEGENERATION (nAMD)

Numerator: Discharges, with either:

- A principal diagnosis code for Exudative age-related macular degeneration (**EXARMD**) or
- A principal diagnosis code for Other Relevant Conditions (**OTRECO**) and any secondary diagnosis codes for Exudative age-related macular degeneration (**EXARMD**) or for Macular puckering (**MACPUC**), or

- A principal diagnosis code for Other Conditions of the Retina and Choroid (**OCRECH**) or for Cystoid Macular Degeneration (**CYMADE**) or for Unspecified Macular Degeneration (**UNMADE**) and any secondary diagnosis codes for Exudative age-related macular degeneration (**EXARMD**) or for Macular puckering (**MACPUC**).

**Indication: CHOROIDAL NEOVASCULARIZATION (CNV)**

**Numerator: Discharges with either:**

- A principal diagnosis code for Retinal neovascularization or Myopia (**RNVMYO**) or
- A principal diagnosis code for Other Relevant Conditions (**OTRECO**) and any secondary diagnosis codes for Retinal neovascularization or Myopia (**RNVMYO**) or
- A principal diagnosis for Other Conditions of the Retina and Choroid (**OCRECH**) and any secondary diagnosis, except if admission is for Indication neovascular age-related Macular Degeneration (**AMD**).
- A principal diagnosis code for Other Relevant Conditions (**OTRECO**) and any secondary diagnosis codes for Other Conditions of the Retina and Choroid (**OCRECH**), except if admission is for Indication neovascular age-related Macular Degeneration (**AMD**).

**2. Other indications**

**Indication: OTHER VASCULAR OCCLUSIONS**

*\*This indication is not included in Retinal Vein Occlusion*

Numerator: Discharges, with either:

- A principal diagnosis code for Other Vascular Occlusions (**OTVAOC**) or
- A principal diagnosis code for Other Relevant Conditions (**OTRECO**) and any secondary diagnosis codes for Retinal Vein Occlusion (**OTVAOC**).

**Indication: ATROPHIC MACULAR DEGENERATION**

*\* This indication is not included in Neovascular Age-Related Macular Degeneration*

Numerator: Discharges, with either:

- A principal diagnosis code for Atrophic Macular Degeneration (**ATMADE**) or
- A principal diagnosis code for Other Relevant Conditions (**OTRECO**) and any secondary diagnosis codes for Atrophic Macular Degeneration (**ATMADE**).

**Indication: CYSTOID MACULAR DEGENERATION**

*\* This indication is not included in Neovascular Age-Related Macular Degeneration*

Numerator: Discharges, with either:

- A principal diagnosis code for Cystoid Macular Degeneration (**CYMADE**) and any secondary diagnosis codes, except for Exudative age-related macular degeneration (**EXARMD**) or for Macular puckering (**MACPUC**) or for Atrophic Macular Degeneration (**ATMADE**); and patient aged less than 50 years old.

**Indication: UNSPECIFIED MACULAR DEGENERATION**

\* This indication is not included in Neovascular Age-Related Macular Degeneration

Numerator: Discharges, with either:

- A principal diagnosis code for Unspecified Macular Degeneration (**UNMADE**) and any secondary diagnosis codes, except for Exudative age-related macular degeneration (**EXARMD**) or for Macular puckering (**MACPUC**) or for Atrophic Macular Degeneration (**ATMADE**), or
- A principal diagnosis code for Cystoid Macular Degeneration (**CYMADE**) and any secondary diagnosis codes, except for Exudative age-related macular degeneration (**EXARMD**) or for Macular puckering (**MACPUC**) or for Atrophic Macular Degeneration (**ATMADE**); and patient aged 50 years old or more.

### 3. Diabetes with ophthalmic manifestations not stated as uncontrolled

For episodes with principal diagnosis codes 25050 and 25052, not classified as any indication above, the following criteria applies:

| If any secondary diagnosis code: | Indication                            |
|----------------------------------|---------------------------------------|
| 36201                            | Unspecified Diabetic Retinopathy      |
| 36202                            | Proliferative Diabetic Retinopathy    |
| 36203 to 36206                   | Nonproliferative Diabetic Retinopathy |
| Other diagnosis code             | The secondary diagnosis code          |
| No diagnosis code                | 25050 or 25052                        |

### 4. Other relevant diagnosis to be included

For episodes with the principal diagnosis codes below, not classified as any indication above, the indication is the principal diagnosis itself:

|       |                                                                                                            |
|-------|------------------------------------------------------------------------------------------------------------|
| 3612  | Serous retinal detachment                                                                                  |
| 3619  | Unspecified retinal detachment                                                                             |
| 25000 | Diabetes mellitus without mention of complication, type II or unspecified type, not stated as uncontrolled |
| 25052 | Diabetes with ophthalmic manifestations, type II or unspecified type, uncontrolled                         |
| 25053 | Diabetes with ophthalmic manifestations, type I [juvenile type], uncontrolled                              |
| 36100 | Retinal detachment with retinal defect, unspecified                                                        |
| 36101 | Recent retinal detachment, partial, with single defect                                                     |
| 36102 | Recent retinal detachment, partial, with multiple defects                                                  |
| 36103 | Recent retinal detachment, partial, with giant tear                                                        |
| 36105 | Recent retinal detachment, total or subtotal                                                               |
| 36106 | Old retinal detachment, partial                                                                            |
| 36107 | Old retinal detachment, total or subtotal                                                                  |
| 36181 | Traction detachment of retina                                                                              |
| 36189 | Other forms of retinal detachment                                                                          |
| 36210 | Background retinopathy, unspecified                                                                        |
| 36212 | Exudative retinopathy                                                                                      |
| 36215 | Retinal telangiectasia                                                                                     |

|    |       |                                                      |
|----|-------|------------------------------------------------------|
| 1  |       |                                                      |
| 2  |       |                                                      |
| 3  | 36216 | Retinal neovascularization NOS                       |
| 4  | 36240 | Retinal layer separation, unspecified                |
| 5  | 36242 | Serous detachment of retinal pigment epithelium      |
| 6  | 36243 | Hemorrhagic detachment of retinal pigment epithelium |
| 7  | 36254 | Macular cyst, hole, or pseudohole                    |
| 8  | 36257 | Drusen (degenerative)                                |
| 9  | 36281 | Retinal hemorrhage                                   |
| 10 | 36283 | Retinal edema                                        |
| 11 | 36442 | Rubeosis iridis                                      |
| 12 | 36474 | Adhesions and disruptions of pupillary membranes     |
| 13 | 37060 | Corneal neovascularization, unspecified              |
| 14 | 37923 | Vitreous hemorrhage                                  |
| 15 | 37924 | Other vitreous opacities                             |
| 16 | 37925 | Vitreous membranes and strands                       |
| 17 | 37929 | Other disorders of vitreous                          |
| 18 |       |                                                      |
| 19 |       |                                                      |
| 20 |       |                                                      |
| 21 |       |                                                      |
| 22 |       |                                                      |
| 23 |       |                                                      |
| 24 |       |                                                      |
| 25 |       |                                                      |
| 26 |       |                                                      |
| 27 |       |                                                      |
| 28 |       |                                                      |

### 5. Other relevant diagnosis to be excluded

For episodes with the principal diagnosis codes below, not classified as any indication above, the episode is excluded from the database:

|    |       |                                                                                 |
|----|-------|---------------------------------------------------------------------------------|
| 29 | 36610 | Senile cataract, unspecified                                                    |
| 30 | 3638  | Other disorders of choroid                                                      |
| 31 | 3669  | Unspecified cataract                                                            |
| 32 | 8715  | Penetration of eyeball with magnetic foreign body                               |
| 33 | 36282 | Retinal exudates and deposits                                                   |
| 34 | 36289 | Other retinal disorders                                                         |
| 35 | 36504 | Ocular hypertension                                                             |
| 36 | 36563 | Glaucoma associated with vascular disorders                                     |
| 37 | 36614 | Posterior subcapsular polar senile cataract                                     |
| 38 | 36619 | Other and combined forms of senile cataract                                     |
| 39 | 37922 | Crystalline deposits in vitreous                                                |
| 40 | 99653 | Mechanical complication due to ocular lens prosthesis                           |
| 41 | 99679 | Other complications due to other internal prosthetic device, implant, and graft |
| 42 |       |                                                                                 |
| 43 |       |                                                                                 |
| 44 |       |                                                                                 |

### 6. Other diagnosis to be excluded

For episodes with the principal diagnosis codes below, the episode is excluded from the database:

|    |       |                                                                   |
|----|-------|-------------------------------------------------------------------|
| 45 |       |                                                                   |
| 46 |       |                                                                   |
| 47 |       |                                                                   |
| 48 |       |                                                                   |
| 49 | 8711  | Ocular laceration with prolapse or exposure of intraocular tissue |
| 50 | 36000 | Purulent endophthalmitis, unspecified                             |
| 51 | 36001 | Acute endophthalmitis                                             |
| 52 | 36615 | Cortical senile cataract                                          |
| 53 | 36616 | Senile nuclear sclerosis                                          |
| 54 | 36617 | Total or mature cataract                                          |
| 55 | 36653 | After-cataract, obscuring vision                                  |
| 56 |       |                                                                   |
| 57 |       |                                                                   |
| 58 |       |                                                                   |
| 59 |       |                                                                   |
| 60 |       |                                                                   |

|       |                                                      |
|-------|------------------------------------------------------|
| 37931 | Aphakia                                              |
| 37932 | Subluxation of lens                                  |
| 37934 | Posterior dislocation of lens                        |
| 99859 | Other postoperative infection                        |
| 99882 | Cataract fragments in eye following cataract surgery |
| V5849 | Other specified aftercare following surgery          |

---

## 7. Other diagnosis to be included

For all other episodes that do not meet any of the criteria above, the indication is the principal diagnosis

### ICD 9 CODES

Codes for Diabetic Macular Edema (**DIMAED**):

|       |                        |
|-------|------------------------|
| 36207 | Diabetic macular edema |
|-------|------------------------|

---

Codes for Retinal Vein Occlusion- Central (**RVOCEN**):

|       |                                |
|-------|--------------------------------|
| 36235 | Central retinal vein occlusion |
|-------|--------------------------------|

---

Codes for Retinal Vein Occlusion- Branch (**RVOBRA**):

|       |                                     |
|-------|-------------------------------------|
| 36236 | Venous tributary (branch) occlusion |
|-------|-------------------------------------|

---

Codes for Exudative age-related macular degeneration (**EXARMD**):

|       |                                       |
|-------|---------------------------------------|
| 36252 | Exudative senile macular degeneration |
|-------|---------------------------------------|

---

Codes for Macular puckering (**MACPUC**):

|       |                   |
|-------|-------------------|
| 36256 | Macular puckering |
|-------|-------------------|

---

Codes for Retinal neovascularization or Myopia (**RNVMYO**):

|       |                                        |
|-------|----------------------------------------|
| 36021 | Progressive high (degenerative) myopia |
|-------|----------------------------------------|

|       |                                |
|-------|--------------------------------|
| 36216 | Retinal neovascularization NOS |
|-------|--------------------------------|

|      |        |
|------|--------|
| 3671 | Myopia |
|------|--------|

---

Codes for Other Conditions of the Retina and Choroid (**OCRECH**):

|       |                            |
|-------|----------------------------|
| 36241 | Central serous retinopathy |
|-------|----------------------------|

|       |                   |
|-------|-------------------|
| 36256 | Macular puckering |
|-------|-------------------|

|       |                              |
|-------|------------------------------|
| 36320 | Chorioretinitis, unspecified |
|-------|------------------------------|

|       |                            |
|-------|----------------------------|
| 36343 | Angioid streaks of choroid |
|-------|----------------------------|

---

Codes for Cystoid Macular Degeneration (**CYMADE**):

|       |                              |
|-------|------------------------------|
| 36253 | Cystoid macular degeneration |
|-------|------------------------------|

---

Codes for Unspecified Macular Degeneration (**UNMADE**):

---

36250 Macular degeneration (senile), unspecified

---

Codes for Other Relevant Conditions (**OTRECO**):

---

3612 Serous retinal detachment  
 3619 Unspecified retinal detachment  
 3638 Other disorders of choroid  
 3669 Unspecified cataract  
 8715 Penetration of eyeball with magnetic foreign body  
 25000 Diabetes mellitus without mention of complication, type II or unspecified type, not stated as uncontrolled  
 25050 Diabetes with ophthalmic manifestations, type II or unspecified type, not stated as uncontrolled  
 25051 Diabetes with ophthalmic manifestations, type I [juvenile type], not stated as uncontrolled  
 25052 Diabetes with ophthalmic manifestations, type II or unspecified type, uncontrolled  
 25053 Diabetes with ophthalmic manifestations, type I [juvenile type], uncontrolled  
 36100 Retinal detachment with retinal defect, unspecified  
 36101 Recent retinal detachment, partial, with single defect  
 36102 Recent retinal detachment, partial, with multiple defects  
 36103 Recent retinal detachment, partial, with giant tear  
 36105 Recent retinal detachment, total or subtotal  
 36106 Old retinal detachment, partial  
 36107 Old retinal detachment, total or subtotal  
 36181 Traction detachment of retina  
 36189 Other forms of retinal detachment  
 36210 Background retinopathy, unspecified  
 36212 Exudative retinopathy  
 36215 Retinal telangiectasia  
 36216 Retinal neovascularization NOS  
 36240 Retinal layer separation, unspecified  
 36242 Serous detachment of retinal pigment epithelium  
 36243 Hemorrhagic detachment of retinal pigment epithelium  
 36254 Macular cyst, hole, or pseudohole  
 36257 Drusen (degenerative)  
 36281 Retinal hemorrhage  
 36282 Retinal exudates and deposits  
 36283 Retinal edema  
 36289 Other retinal disorders  
 36442 Rubeosis iridis  
 36474 Adhesions and disruptions of pupillary membranes  
 36504 Ocular hypertension  
 36563 Glaucoma associated with vascular disorders  
 36610 Senile cataract, unspecified  
 36614 Posterior subcapsular polar senile cataract  
 36619 Other and combined forms of senile cataract  
 37060 Corneal neovascularization, unspecified

|       |                                                                                 |
|-------|---------------------------------------------------------------------------------|
| 37922 | Crystalline deposits in vitreous                                                |
| 37923 | Vitreous hemorrhage                                                             |
| 37924 | Other vitreous opacities                                                        |
| 37925 | Vitreous membranes and strands                                                  |
| 37929 | Other disorders of vitreous                                                     |
| 99653 | Mechanical complication due to ocular lens prosthesis                           |
| 99679 | Other complications due to other internal prosthetic device, implant, and graft |

Codes for Other Vascular Occlusions (**OTVAOC**):

|       |                                         |
|-------|-----------------------------------------|
| 36230 | Retinal vascular occlusion, unspecified |
| 36231 | Central retinal artery occlusion        |
| 36232 | Retinal arterial branch occlusion       |

Codes for Atrophic Macular Degeneration (**ATMADE**):

|       |                                          |
|-------|------------------------------------------|
| 36251 | Nonexudative senile macular degeneration |
|-------|------------------------------------------|

## IDENTIFICATION OF INTRAVITREAL ANTI-VEGF TREATMENT EVENTS FOR ICD-10

### 1. Main indications

#### Indication: DIABETIC MACULAR EDEMA (DME)

Numerator: Discharges, with either:

- A principal diagnosis code for Diabetic Macular Edema (**DIMAED**) or
- A principal diagnosis code for Other Relevant Conditions (**OTRECO**) or for Other Type 2 Diabetes Conditions (**ODIACO**) and any secondary diagnosis codes for Diabetic Macular Edema (**DIMAED**) or
- A principal diagnosis code for Retinal Edema (**RETEDE**) and any secondary diagnosis codes for any diabetic condition (ICD10 codes E08-E13).

#### Indication: RETINAL VEIN OCCLUSION (RVO)

#### Indication: RETINAL VEIN OCCLUSION (CENTRAL)

Numerator: Discharges, with either:

- A principal diagnosis code for Retinal Vein Occlusion- Central (**RVOCEN**) or
- A principal diagnosis code for Other Relevant Conditions (**OTRECO**) or Other Diagnosis for Macular Degeneration (**ODMADE**) and any secondary diagnosis codes for Retinal Vein Occlusion- Central (**RVOCEN**).

#### Indication: RETINAL VEIN OCCLUSION (BRANCH)

Numerator: Discharges, with either:

- A principal diagnosis code for Retinal Vein Occlusion- Branch (**RVOBRA**) or
- A principal diagnosis code for Other Relevant Conditions (**OTRECO**) or Other Diagnosis for Macular Degeneration (**ODMADE**) and any secondary diagnosis codes for Retinal Vein Occlusion- Branch (**RVOBRA**).



**Indication: NEOVASCULAR AGE-RELATED MACULAR DEGENERATION (nAMD)**

Numerator: Discharges, with either:

- A principal diagnosis code for Exudative age-related macular degeneration (**EXARMD**) or
- A principal diagnosis code for Other Relevant Conditions (**OTRECO**) or Other Diagnosis for Macular Degeneration (**ODMADE**) or diagnosis code for Macular Puckering (**MACPUC**) and any secondary diagnosis codes for Exudative age-related macular degeneration (**EXARMD**) or
- A principal diagnosis code for Other Relevant Conditions (**OTRECO**) or Other Diagnosis for Macular Degeneration (**ODMADE**) and a previous nAMD case, regardless of age.

**Indication: CHOROIDAL NEOVASCULARIZATION (CNV)**

Numerator: Discharges with either:

- A principal diagnosis code for Retinal neovascularization or Myopia (**RNVMYO**) or
- A principal diagnosis code for Other Relevant Conditions (**OTRECO**) or Other Diagnosis for Macular Degeneration (**ODMADE**) and any secondary diagnosis codes for Retinal neovascularization or Myopia (**RNVMYO**) or
- A principal diagnosis for Macular Puckering (**MACPUC**), except if secondary diagnosis codes for Diabetic Macular Edema (**DIMAED**).

**2. Other indications****Indication: OTHER VASCULAR OCCLUSIONS**

*\*This indication is not included in Retinal Vein Occlusion*

Numerator: Discharges, with either:

- A principal diagnosis code for Other Vascular Occlusions (**OTVAOC**) or
- A principal diagnosis code for Other Relevant (**OTRECO**) and any secondary diagnosis codes for Retinal Vein Occlusion (**OTVAOC**).

**Indication: ATROPHIC MACULAR DEGENERATION**

*\* This indication is not included in Neovascular Age-Related Macular Degeneration*

Numerator: Discharges, with either:

- A principal diagnosis code for Atrophic Macular Degeneration (**ATMADE**) or
- A principal diagnosis code for Other Relevant Conditions (**OTRECO**) and any secondary diagnosis codes for Atrophic Macular Degeneration (**ATMADE**).

**3. Diabetes with Retinopathy**

For episodes with the principal diagnosis codes below, without secondary diagnosis of Diabetic Macular Edema (**DIMAED**), the following criteria applies:

| Principal diagnosis       | Indication                         |
|---------------------------|------------------------------------|
| E11319                    | Unspecified Diabetic Retinopathy   |
| E113591, E113592, E113593 | Proliferative Diabetic Retinopathy |

---

E113291, E113292, E113491, E113551, E113552      Nonproliferative Diabetic Retinopathy

---

#### 4. Other diagnosis to be excluded

For episodes with the principal diagnosis codes below, the episode is excluded from the database:

---

|         |                                                                        |
|---------|------------------------------------------------------------------------|
| G245    | Blepharospasm                                                          |
| H401120 | Primary open-angle glaucoma, left eye, stage unspecified               |
| H5000   | Unspecified esotropia                                                  |
| H5005   | Alternating esotropia                                                  |
| Z48810  | Encounter for surgical aftercare following surgery on the sense organs |

---

#### 5. Other diagnosis to be included

For all other episodes that do not meet any of the criteria above, the indication is the principal diagnosis

#### ICD 10 CODES

Codes for Diabetic Macular Edema (**DIMAED**):

---

|         |                                                                                                                |
|---------|----------------------------------------------------------------------------------------------------------------|
| E10311  | Type 1 diabetes mellitus with unspecified diabetic retinopathy with macular edema                              |
| E103212 | Type 1 diabetes mellitus with mild nonproliferative diabetic retinopathy with macular edema, left eye          |
| E11311  | Type 2 diabetes mellitus with unspecified diabetic retinopathy with macular edema                              |
| E113211 | Type 2 diabetes mellitus with mild nonproliferative diabetic retinopathy with macular edema, right eye         |
| E113212 | Type 2 diabetes mellitus with mild nonproliferative diabetic retinopathy with macular edema, left eye          |
| E113213 | Type 2 diabetes mellitus with mild nonproliferative diabetic retinopathy with macular edema, bilateral         |
| E11331  | Type 2 diabetes mellitus with moderate nonproliferative diabetic retinopathy with macular edema                |
| E113311 | Type 2 diabetes mellitus with moderate nonproliferative diabetic retinopathy with macular edema, right eye     |
| E113312 | Type 2 diabetes mellitus with moderate nonproliferative diabetic retinopathy with macular edema, left eye      |
| E113313 | Type 2 diabetes mellitus with moderate nonproliferative diabetic retinopathy with macular edema, bilateral     |
| E113411 | Type 2 diabetes mellitus with severe nonproliferative diabetic retinopathy with macular edema, right eye       |
| E113412 | Type 2 diabetes mellitus with severe nonproliferative diabetic retinopathy with macular edema, left eye        |
| E113413 | Type 2 diabetes mellitus with severe nonproliferative diabetic retinopathy with macular edema, bilateral       |
| E113419 | Type 2 diabetes mellitus with severe nonproliferative diabetic retinopathy with macular edema, unspecified eye |
| E113511 | Type 2 diabetes mellitus with proliferative diabetic retinopathy with macular edema, right eye                 |
| E113512 | Type 2 diabetes mellitus with proliferative diabetic retinopathy with macular edema, left eye                  |

---

|         |                                                                                                                   |
|---------|-------------------------------------------------------------------------------------------------------------------|
| E113513 | Type 2 diabetes mellitus with proliferative diabetic retinopathy with macular edema, bilateral                    |
| E13311  | Other specified diabetes mellitus with unspecified diabetic retinopathy with macular edema                        |
| E133413 | Other specified diabetes mellitus with severe nonproliferative diabetic retinopathy with macular edema, bilateral |
| E133511 | Other specified diabetes mellitus with proliferative diabetic retinopathy with macular edema, unspecified eye     |

Codes for Other Type 2 Diabetes Conditions (**ODIACO**):

|         |                                                                                    |
|---------|------------------------------------------------------------------------------------|
| E113551 | Type 2 diabetes mellitus with stable proliferative diabetic retinopathy, right eye |
| E113552 | Type 2 diabetes mellitus with stable proliferative diabetic retinopathy, left eye  |
| E1136   | Type 2 diabetes mellitus with diabetic cataract                                    |

Codes for Retinal Edema (**RETEDE**):

|       |               |
|-------|---------------|
| H3581 | Retinal edema |
|-------|---------------|

Codes for Retinal Vein Occlusion- Central (**RVOCEN**):

|         |                                                                            |
|---------|----------------------------------------------------------------------------|
| H348110 | Central retinal vein occlusion, right eye, with macular edema              |
| H348111 | Central retinal vein occlusion, right eye, with retinal neovascularization |
| H348112 | Central retinal vein occlusion, right eye, stable                          |
| H348120 | Central retinal vein occlusion, left eye, with macular edema               |
| H348121 | Central retinal vein occlusion, left eye, with retinal neovascularization  |
| H348122 | Central retinal vein occlusion, left eye, stable                           |
| H348130 | Central retinal vein occlusion, bilateral, with macular edema              |
| H348131 | Central retinal vein occlusion, bilateral, with retinal neovascularization |
| H348132 | Central retinal vein occlusion, bilateral, stable                          |
| H348190 | Central retinal vein occlusion, unspecified eye, with macular edema        |

Codes for Retinal Vein Occlusion- Branch (**RVOBRA**):

|         |                                                                                             |
|---------|---------------------------------------------------------------------------------------------|
| H348310 | Tributary (branch) retinal vein occlusion, right eye, with macular edema                    |
| H348311 | Tributary (branch) retinal vein occlusion, right eye, with retinal neovascularization       |
| H348312 | Tributary (branch) retinal vein occlusion, right eye, stable                                |
| H348320 | Tributary (branch) retinal vein occlusion, left eye, with macular edema                     |
| H348321 | Tributary (branch) retinal vein occlusion, left eye, with retinal neovascularization        |
| H348322 | Tributary (branch) retinal vein occlusion, left eye, stable                                 |
| H348330 | Tributary (branch) retinal vein occlusion, bilateral, with macular edema                    |
| H348331 | Tributary (branch) retinal vein occlusion, bilateral, with retinal neovascularization       |
| H348332 | Tributary (branch) retinal vein occlusion, bilateral, stable                                |
| H348390 | Tributary (branch) retinal vein occlusion, unspecified eye, with macular edema              |
| H348391 | Tributary (branch) retinal vein occlusion, unspecified eye, with retinal neovascularization |
| H348392 | Tributary (branch) retinal vein occlusion, unspecified eye, stable                          |

Codes for Exudative age-related macular degeneration (**EXARMD**):

|    |         |                                                                                                   |
|----|---------|---------------------------------------------------------------------------------------------------|
| 1  | H35321  | Exudative age-related macular degeneration, right eye                                             |
| 2  |         |                                                                                                   |
| 3  | H353210 | Exudative age-related macular degeneration, right eye, stage unspecified                          |
| 4  | H353211 | Exudative age-related macular degeneration, right eye, with active choroidal neovascularization   |
| 5  |         |                                                                                                   |
| 6  | H353212 | Exudative age-related macular degeneration, right eye, with inactive choroidal neovascularization |
| 7  |         |                                                                                                   |
| 8  | H353213 | Exudative age-related macular degeneration, right eye, with inactive scar                         |
| 9  | H353220 | Exudative age-related macular degeneration, left eye, stage unspecified                           |
| 10 | H353221 | Exudative age-related macular degeneration, left eye, with active choroidal neovascularization    |
| 11 |         |                                                                                                   |
| 12 | H353222 | Exudative age-related macular degeneration, left eye, with inactive choroidal neovascularization  |
| 13 |         |                                                                                                   |
| 14 | H353230 | Exudative age-related macular degeneration, bilateral, stage unspecified                          |
| 15 | H353231 | Exudative age-related macular degeneration, bilateral, with active choroidal neovascularization   |
| 16 |         |                                                                                                   |
| 17 | H353232 | Exudative age-related macular degeneration, bilateral, with inactive choroidal neovascularization |
| 18 |         |                                                                                                   |
| 19 | H353290 | Exudative age-related macular degeneration, unspecified, stage unspecified                        |
| 20 | H353291 | Exudative age-related macular degeneration, unspecified, with active choroidal neovascularization |
| 21 |         |                                                                                                   |
| 22 |         |                                                                                                   |
| 23 |         |                                                                                                   |
| 24 |         |                                                                                                   |
| 25 |         |                                                                                                   |

Codes for Macular puckering (**MACPUC**):

|    |        |                                      |
|----|--------|--------------------------------------|
| 26 |        |                                      |
| 27 |        |                                      |
| 28 | H35371 | Puckering of Macula, right eye       |
| 29 | H35372 | Puckering of Macula, left eye        |
| 30 | H35379 | Puckering of Macula, unspecified eye |
| 31 |        |                                      |

Codes for Retinal neovascularization or Myopia (**RNVMYO**):

|    |        |                                                                  |
|----|--------|------------------------------------------------------------------|
| 32 |        |                                                                  |
| 33 |        |                                                                  |
| 34 |        |                                                                  |
| 35 | H35051 | Retinal neovascularization, unspecified, right eye               |
| 36 | H35052 | Retinal neovascularization, unspecified, left eye                |
| 37 | H35053 | Retinal neovascularization, unspecified, bilateral               |
| 38 | H35059 | Retinal neovascularization, unspecified, unspecified eye         |
| 39 | H3533  | Angioid streaks of macula                                        |
| 40 | H4421  | Degenerative myopia, right eye                                   |
| 41 | H4422  | Degenerative myopia, left eye                                    |
| 42 | H442A1 | Degenerative myopia with choroidal neovascularization, right eye |
| 43 | H442A2 | Degenerative myopia with choroidal neovascularization, left eye  |
| 44 |        |                                                                  |
| 45 |        |                                                                  |

Codes for Other Diagnosis for Macular Degeneration (**ODMADE**):

|    |        |                                         |
|----|--------|-----------------------------------------|
| 46 |        |                                         |
| 47 |        |                                         |
| 48 | H3530  | Unspecified macular degeneration        |
| 49 | H35351 | Cystoid macular degeneration, right eye |
| 50 | H35352 | Cystoid macular degeneration, left eye  |
| 51 |        |                                         |

Codes for Other Relevant Conditions (**OTRECO**):

|    |       |                                         |
|----|-------|-----------------------------------------|
| 52 |       |                                         |
| 53 |       |                                         |
| 54 |       |                                         |
| 55 | H2511 | Age-related nuclear cataract, right eye |
| 56 | H2512 | Age-related nuclear cataract, left eye  |
| 57 |       |                                         |

|    |        |                                                              |
|----|--------|--------------------------------------------------------------|
| 1  |        |                                                              |
| 2  |        |                                                              |
| 3  | H25811 | Combined forms of age-related cataract, right eye            |
| 4  | H25812 | Combined forms of age-related cataract, left eye             |
| 5  | H259   | Unspecified age-related cataract                             |
| 6  | H269   | Unspecified cataract                                         |
| 7  | H318   | Other specified disorders of choroid                         |
| 8  | H33001 | Unspecified retinal detachment with retinal break, right eye |
| 9  | H33002 | Unspecified retinal detachment with retinal break, left eye  |
| 10 | H33011 | Retinal detachment with single break, right eye              |
| 11 | H33012 | Retinal detachment with single break, left eye               |
| 12 | H33021 | Retinal detachment with multiple breaks, right eye           |
| 13 | H33022 | Retinal detachment with multiple breaks, left eye            |
| 14 | H33031 | Retinal detachment with giant retinal tear, right eye        |
| 15 | H33032 | Retinal detachment with giant retinal tear, left eye         |
| 16 | H33051 | Total retinal detachment, right eye                          |
| 17 | H33052 | Total retinal detachment, left eye                           |
| 18 | H3321  | Serous retinal detachment, right eye                         |
| 19 | H3322  | Serous retinal detachment, left eye                          |
| 20 | H3500  | Unspecified background retinopathy                           |
| 21 | H35021 | Exudative retinopathy, right eye                             |
| 22 | H35022 | Exudative retinopathy, left eye                              |
| 23 | H35712 | Central serous chorioretinopathy, left eye                   |
| 24 | H3589  | Other specified retinal disorders                            |
| 25 | H4089  | Other specified glaucoma                                     |
| 26 | H409   | Unspecified glaucoma                                         |
| 27 | H4311  | Vitreous hemorrhage, right eye                               |
| 28 | H4312  | Vitreous hemorrhage, left eye                                |
| 29 | H59031 | Cystoid macular edema following cataract surgery, right eye  |
| 30 | H59032 | Cystoid macular edema following cataract surgery, left eye   |

#### Codes for Other Vascular Occlusions (OTVAOC):

|    |       |                                             |
|----|-------|---------------------------------------------|
| 31 | H3411 | Central retinal artery occlusion, right eye |
| 32 | H3412 | Central retinal artery occlusion, left eye  |
| 33 | H349  | Unspecified retinal vascular occlusion      |

#### Codes for Atrophic Macular Degeneration (ATMADE):

|    |         |                                                                                                           |
|----|---------|-----------------------------------------------------------------------------------------------------------|
| 34 | H353110 | Nonexudative age-related macular degeneration, right eye, stage unspecified                               |
| 35 | H353111 | Nonexudative age-related macular degeneration, right eye, early dry stage                                 |
| 36 | H353112 | Nonexudative age-related macular degeneration, right eye, intermediary dry stage                          |
| 37 | H353113 | Nonexudative age-related macular degeneration, right eye, advanced atrophic without subfoveal involvement |
| 38 | H353120 | Nonexudative age-related macular degeneration, left eye, stage unspecified                                |
| 39 | H353121 | Nonexudative age-related macular degeneration, left eye, early dry stage                                  |
| 40 | H353122 | Nonexudative age-related macular degeneration, left eye, intermediary dry stage                           |

---

|   |                                                                                            |
|---|--------------------------------------------------------------------------------------------|
| 1 |                                                                                            |
| 2 |                                                                                            |
| 3 |                                                                                            |
| 4 | H353123 Nonexudative age-related macular degeneration, left eye, advanced atrophic without |
| 5 | subfoveal involvement                                                                      |
| 6 | H353130 Nonexudative age-related macular degeneration, bilateral, stage unspecified        |
| 7 | H353132 Nonexudative age-related macular degeneration, bilateral, intermediary dry stage   |
| 8 | H353190 Nonexudative age-related macular degeneration, unspecified eye, stage unspecified  |

---

For peer review only

## Appendix 2

Organizational level of the hospital's ophthalmology departments. Minimal requirements, as defined by the National Network of hospital specialties and referral for Ophthalmology [1]

### Group I:

- Health care: refraction test and consultations (general and diabetes)
- Minimum number of inhabitants in the area of direct influence: 75,000
- Working hours: 8 am to 8 pm
- Minimum equipment required: refraction with slit lamp and keratometer, biometer, ultrasound, campimeter, optical coherence tomography (OCT), angiograph / retinograph, YAG laser, Argon laser or similar, operating microscope, phacoemulsifier
- Minimum of Ophthalmologist specialists: 5

### Group II:

- Health care: all ophthalmic health care with the exception of pediatric oncology, transplantation, glaucoma and cataracts, retinopathy of prematurity, rare diseases
- Daytime medical and surgical urgency: 12h/day; 7 days/week
- Minimum of Ophthalmologist specialists: 12
- Maximum of ophthalmologists: to be defined according to the population to be served;
- Minimum equipment required: in addition to equipment required for hospitals in Group I, vitrectomy device with endolaser, specular microscope and corneal topograph.

### Group III:

- Health care - responsible for all ophthalmic health care, excluding those related to Reference Centers (approved or to be approved)
- Multipurpose emergency: 2 ophthalmologists in physical presence 24h/day; 7 days/week.
- Minimum equipment required: in addition to equipment required for hospitals in Group II, Retcam and portable electrophysiology

**Source:** [1] Serviço Nacional de Saúde. Rede nacional de especialidade hospitalar e de referência de oftalmologia [Internet]. 2016. Available from: [https://www.sns.gov.pt/wp-content/uploads/2016/05/Proposta-RNEHR-Oftalmologia-2016-ACSS-1\\_VFinal.pdf](https://www.sns.gov.pt/wp-content/uploads/2016/05/Proposta-RNEHR-Oftalmologia-2016-ACSS-1_VFinal.pdf)



## STROBE Statement—checklist of items that should be included in reports of observational studies

|                           | Item No                                                                                                                                                                                                                                                                                                   | Recommendation                                                                                                                                                                                                                                                                                                                                                                                                                                                         | Page No |
|---------------------------|-----------------------------------------------------------------------------------------------------------------------------------------------------------------------------------------------------------------------------------------------------------------------------------------------------------|------------------------------------------------------------------------------------------------------------------------------------------------------------------------------------------------------------------------------------------------------------------------------------------------------------------------------------------------------------------------------------------------------------------------------------------------------------------------|---------|
| <b>Title and abstract</b> | 1                                                                                                                                                                                                                                                                                                         | (a) Indicate the study's design with a commonly used term in the title or the abstract                                                                                                                                                                                                                                                                                                                                                                                 | 2       |
|                           |                                                                                                                                                                                                                                                                                                           | (b) Provide in the abstract an informative and balanced summary of what was done and what was found                                                                                                                                                                                                                                                                                                                                                                    | 2       |
| <b>Introduction</b>       |                                                                                                                                                                                                                                                                                                           |                                                                                                                                                                                                                                                                                                                                                                                                                                                                        |         |
| Background/rationale      | 2                                                                                                                                                                                                                                                                                                         | Explain the scientific background and rationale for the investigation being reported                                                                                                                                                                                                                                                                                                                                                                                   | 3       |
| Objectives                | 3                                                                                                                                                                                                                                                                                                         | State specific objectives, including any prespecified hypotheses                                                                                                                                                                                                                                                                                                                                                                                                       | 3       |
| <b>Methods</b>            |                                                                                                                                                                                                                                                                                                           |                                                                                                                                                                                                                                                                                                                                                                                                                                                                        |         |
| Study design              | 4                                                                                                                                                                                                                                                                                                         | Present key elements of study design early in the paper                                                                                                                                                                                                                                                                                                                                                                                                                | 3       |
| Setting                   | 5                                                                                                                                                                                                                                                                                                         | Describe the setting, locations, and relevant dates, including periods of recruitment, exposure, follow-up, and data collection                                                                                                                                                                                                                                                                                                                                        | 3,4     |
| Participants              | 6                                                                                                                                                                                                                                                                                                         | (a) <i>Cohort study</i> —Give the eligibility criteria, and the sources and methods of selection of participants. Describe methods of follow-up<br><i>Case-control study</i> —Give the eligibility criteria, and the sources and methods of case ascertainment and control selection. Give the rationale for the choice of cases and controls<br><i>Cross-sectional study</i> —Give the eligibility criteria, and the sources and methods of selection of participants | 4       |
|                           |                                                                                                                                                                                                                                                                                                           | (b) <i>Cohort study</i> —For matched studies, give matching criteria and number of exposed and unexposed<br><i>Case-control study</i> —For matched studies, give matching criteria and the number of controls per case                                                                                                                                                                                                                                                 | NA      |
| Variables                 | 7                                                                                                                                                                                                                                                                                                         | Clearly define all outcomes, exposures, predictors, potential confounders, and effect modifiers. Give diagnostic criteria, if applicable                                                                                                                                                                                                                                                                                                                               | 4       |
| Data sources/measurement  | 8*                                                                                                                                                                                                                                                                                                        | For each variable of interest, give sources of data and details of methods of assessment (measurement). Describe comparability of assessment methods if there is more than one group                                                                                                                                                                                                                                                                                   | 4,5     |
| Bias                      | 9                                                                                                                                                                                                                                                                                                         | Describe any efforts to address potential sources of bias                                                                                                                                                                                                                                                                                                                                                                                                              | 4       |
| Study size                | 10                                                                                                                                                                                                                                                                                                        | Explain how the study size was arrived at                                                                                                                                                                                                                                                                                                                                                                                                                              | 3,4     |
| Quantitative variables    | 11                                                                                                                                                                                                                                                                                                        | Explain how quantitative variables were handled in the analyses. If applicable, describe which groupings were chosen and why                                                                                                                                                                                                                                                                                                                                           | 4,5     |
| Statistical methods       | 12                                                                                                                                                                                                                                                                                                        | (a) Describe all statistical methods, including those used to control for confounding                                                                                                                                                                                                                                                                                                                                                                                  | 4,5     |
|                           |                                                                                                                                                                                                                                                                                                           | (b) Describe any methods used to examine subgroups and interactions                                                                                                                                                                                                                                                                                                                                                                                                    | 5       |
|                           | (c) Explain how missing data were addressed                                                                                                                                                                                                                                                               | 4                                                                                                                                                                                                                                                                                                                                                                                                                                                                      |         |
|                           | (d) <i>Cohort study</i> —If applicable, explain how loss to follow-up was addressed<br><i>Case-control study</i> —If applicable, explain how matching of cases and controls was addressed<br><i>Cross-sectional study</i> —If applicable, describe analytical methods taking account of sampling strategy | NA                                                                                                                                                                                                                                                                                                                                                                                                                                                                     |         |
|                           | (e) Describe any sensitivity analyses                                                                                                                                                                                                                                                                     | NA                                                                                                                                                                                                                                                                                                                                                                                                                                                                     |         |

Continued on next page



1  
2  
3  
4  
5  
6  
7  
8  
9  
10  
11  
12  
13  
14  
15  
16  
17  
18  
19  
20  
21  
22  
23  
24  
25  
26  
27  
28  
29  
30  
31  
32  
33  
34  
35  
36  
37  
38  
39  
40  
41  
42  
43  
44  
45  
46  
47  
48  
49  
50  
51  
52  
53  
54  
55  
56  
57  
58  
59  
60**Results**

|                  |     |                                                                                                                                                                                                              |       |
|------------------|-----|--------------------------------------------------------------------------------------------------------------------------------------------------------------------------------------------------------------|-------|
| Participants     | 13* | (a) Report numbers of individuals at each stage of study—eg numbers potentially eligible, examined for eligibility, confirmed eligible, included in the study, completing follow-up, and analysed            | 5     |
|                  |     | (b) Give reasons for non-participation at each stage                                                                                                                                                         | NA    |
|                  |     | (c) Consider use of a flow diagram                                                                                                                                                                           | NA    |
| Descriptive data | 14* | (a) Give characteristics of study participants (eg demographic, clinical, social) and information on exposures and potential confounders                                                                     | 6,7   |
|                  |     | (b) Indicate number of participants with missing data for each variable of interest                                                                                                                          | NA    |
|                  |     | (c) <i>Cohort study</i> —Summarise follow-up time (eg, average and total amount)                                                                                                                             | NA    |
| Outcome data     | 15* | <i>Cohort study</i> —Report numbers of outcome events or summary measures over time                                                                                                                          | NA    |
|                  |     | <i>Case-control study</i> —Report numbers in each exposure category, or summary measures of exposure                                                                                                         | NA    |
|                  |     | <i>Cross-sectional study</i> —Report numbers of outcome events or summary measures                                                                                                                           | 5,6,7 |
| Main results     | 16  | (a) Give unadjusted estimates and, if applicable, confounder-adjusted estimates and their precision (eg, 95% confidence interval). Make clear which confounders were adjusted for and why they were included | 7,8   |
|                  |     | (b) Report category boundaries when continuous variables were categorized                                                                                                                                    | NA    |
|                  |     | (c) If relevant, consider translating estimates of relative risk into absolute risk for a meaningful time period                                                                                             | NA    |
| Other analyses   | 17  | Report other analyses done—eg analyses of subgroups and interactions, and sensitivity analyses                                                                                                               | NA    |

**Discussion**

|                  |    |                                                                                                                                                                            |       |
|------------------|----|----------------------------------------------------------------------------------------------------------------------------------------------------------------------------|-------|
| Key results      | 18 | Summarise key results with reference to study objectives                                                                                                                   | 9     |
| Limitations      | 19 | Discuss limitations of the study, taking into account sources of potential bias or imprecision. Discuss both direction and magnitude of any potential bias                 | 10    |
| Interpretation   | 20 | Give a cautious overall interpretation of results considering objectives, limitations, multiplicity of analyses, results from similar studies, and other relevant evidence | 9,10  |
| Generalisability | 21 | Discuss the generalisability (external validity) of the study results                                                                                                      | 10,11 |

**Other information**

|         |    |                                                                                                                                                               |    |
|---------|----|---------------------------------------------------------------------------------------------------------------------------------------------------------------|----|
| Funding | 22 | Give the source of funding and the role of the funders for the present study and, if applicable, for the original study on which the present article is based | 11 |
|---------|----|---------------------------------------------------------------------------------------------------------------------------------------------------------------|----|

\*Give information separately for cases and controls in case-control studies and, if applicable, for exposed and unexposed groups in cohort and cross-sectional studies.

**Note:** An Explanation and Elaboration article discusses each checklist item and gives methodological background and published examples of transparent reporting. The STROBE checklist is best used in conjunction with this article (freely available on the Web sites of PLoS Medicine at <http://www.plosmedicine.org/>, Annals of Internal Medicine at <http://www.annals.org/>, and Epidemiology at <http://www.epidem.com/>). Information on the STROBE Initiative is available at [www.strobe-statement.org](http://www.strobe-statement.org).

# BMJ Open

## Trends, geographical variation, and factors associated with the use of ANTI-VEGF intravitreal injections in Portugal (2013–18): A retrospective analysis of administrative data

|                                 |                                                                                                                                                                                                                                                                                                                                                                                                                                                                                                                                                                                                                                                                                                                                                                                                                                                                                                                                                                                                                                                           |
|---------------------------------|-----------------------------------------------------------------------------------------------------------------------------------------------------------------------------------------------------------------------------------------------------------------------------------------------------------------------------------------------------------------------------------------------------------------------------------------------------------------------------------------------------------------------------------------------------------------------------------------------------------------------------------------------------------------------------------------------------------------------------------------------------------------------------------------------------------------------------------------------------------------------------------------------------------------------------------------------------------------------------------------------------------------------------------------------------------|
| Journal:                        | <i>BMJ Open</i>                                                                                                                                                                                                                                                                                                                                                                                                                                                                                                                                                                                                                                                                                                                                                                                                                                                                                                                                                                                                                                           |
| Manuscript ID                   | bmjopen-2021-055478.R1                                                                                                                                                                                                                                                                                                                                                                                                                                                                                                                                                                                                                                                                                                                                                                                                                                                                                                                                                                                                                                    |
| Article Type:                   | Original research                                                                                                                                                                                                                                                                                                                                                                                                                                                                                                                                                                                                                                                                                                                                                                                                                                                                                                                                                                                                                                         |
| Date Submitted by the Author:   | 10-Mar-2022                                                                                                                                                                                                                                                                                                                                                                                                                                                                                                                                                                                                                                                                                                                                                                                                                                                                                                                                                                                                                                               |
| Complete List of Authors:       | Rocha, João Victor; New University of Lisbon National School of Public Health; New University of Lisbon Comprehensive Health Research Centre National School of Public Health<br>Marques, Ana; New University of Lisbon National School of Public Health; New University of Lisbon Comprehensive Health Research Centre National School of Public Health<br>Macedo, Antonio Filipe; Linnaeus University, Medicine and Optometry<br>Afonso-Silva, Marta; HE&OR, Novartis Farma, Produtos Farmacêuticos SA<br>Laires, Pedro; HE&OR, Novartis Farma, Produtos Farmacêuticos SA; New University of Lisbon National School of Public Health<br>Almeida, Ana Sofia; Medical Affairs, Novartis Farma, Produtos Farmacêuticos SA<br>Fernandes, Julieta; Medical Affairs, Novartis Farma, Produtos Farmacêuticos SA<br>Pardal, Marisa; HE&OR, Novartis Farma, Produtos Farmacêuticos SA<br>Santana, Rui; New University of Lisbon National School of Public Health; New University of Lisbon Comprehensive Health Research Centre National School of Public Health |
| <b>Primary Subject Heading</b>: | Ophthalmology                                                                                                                                                                                                                                                                                                                                                                                                                                                                                                                                                                                                                                                                                                                                                                                                                                                                                                                                                                                                                                             |
| Secondary Subject Heading:      | Public health                                                                                                                                                                                                                                                                                                                                                                                                                                                                                                                                                                                                                                                                                                                                                                                                                                                                                                                                                                                                                                             |
| Keywords:                       | OPHTHALMOLOGY, PUBLIC HEALTH, Medical retina < OPTHALMOLOGY                                                                                                                                                                                                                                                                                                                                                                                                                                                                                                                                                                                                                                                                                                                                                                                                                                                                                                                                                                                               |
|                                 |                                                                                                                                                                                                                                                                                                                                                                                                                                                                                                                                                                                                                                                                                                                                                                                                                                                                                                                                                                                                                                                           |

SCHOLARONE™  
Manuscripts

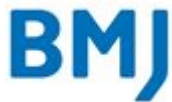

I, the Submitting Author has the right to grant and does grant on behalf of all authors of the Work (as defined in the below author licence), an exclusive licence and/or a non-exclusive licence for contributions from authors who are: i) UK Crown employees; ii) where BMJ has agreed a CC-BY licence shall apply, and/or iii) in accordance with the terms applicable for US Federal Government officers or employees acting as part of their official duties; on a worldwide, perpetual, irrevocable, royalty-free basis to BMJ Publishing Group Ltd ("BMJ") its licensees and where the relevant Journal is co-owned by BMJ to the co-owners of the Journal, to publish the Work in this journal and any other BMJ products and to exploit all rights, as set out in our [licence](#).

The Submitting Author accepts and understands that any supply made under these terms is made by BMJ to the Submitting Author unless you are acting as an employee on behalf of your employer or a postgraduate student of an affiliated institution which is paying any applicable article publishing charge ("APC") for Open Access articles. Where the Submitting Author wishes to make the Work available on an Open Access basis (and intends to pay the relevant APC), the terms of reuse of such Open Access shall be governed by a Creative Commons licence – details of these licences and which [Creative Commons](#) licence will apply to this Work are set out in our licence referred to above.

Other than as permitted in any relevant BMJ Author's Self Archiving Policies, I confirm this Work has not been accepted for publication elsewhere, is not being considered for publication elsewhere and does not duplicate material already published. I confirm all authors consent to publication of this Work and authorise the granting of this licence.

**TITLE PAGE**

**TITLE:** TRENDS, GEOGRAPHICAL VARIATION, AND FACTORS ASSOCIATED WITH THE USE OF ANTI-VEGF INTRAVITREAL INJECTIONS IN PORTUGAL (2013–18): A RETROSPECTIVE ANALYSIS OF ADMINISTRATIVE DATA

**Authors:** João V Rocha<sup>1,2</sup>, Ana P Marques<sup>1,2</sup>, António F Macedo<sup>3</sup>, Marta Afonso-Silva<sup>4</sup>, Pedro A Laires<sup>1,2</sup>, Ana S Almeida<sup>5</sup>, Julieta Fernandes<sup>5</sup>, Marisa Pardal<sup>4</sup>, Rui Santana<sup>1,2</sup>

1. NOVA National School of Public Health, Public Health Research Centre, Universidade NOVA de Lisboa, Lisbon, Portugal.
2. Comprehensive Health Research Center (CHRC), Lisbon, Portugal.
3. Department of Medicine and Optometry, Linnaeus University, Kalmar, Sweden.
4. HE&OR, Novartis Farma, Produtos Farmacêuticos SA, Porto Salvo, Portugal.
5. Medical Affairs, Novartis Farma, Produtos Farmacêuticos SA, Porto Salvo, Portugal.

**Corresponding author:** João V Rocha ([jv.rocha@ensp.unl.pt](mailto:jv.rocha@ensp.unl.pt))

Av. Padre Cruz, 1600-560 Lisboa, Portugal

**Word count:** 3,105

## ABSTRACT

**Aims:** The arrival of anti-vascular endothelial growth factor (anti-VEGF) therapies represented a treatment shift for several ophthalmologic disorders and led to an increasing number of patients undergoing intravitreal injections. The aims of this observational study were to assess the expansion of anti-VEGF intravitreal injections in the Portuguese National Health System (NHS) and to identify factors correlated with geographic variations in episode rates. **Methods:** Administrative database on discharge from Portuguese NHS hospitals was analysed for annual values and rates of intravitreal anti-VEGF injections at a national and regional level, between 2013 and 2018. **Results:** The number of episodes of anti-VEGF treatment and patients treated increased 16% and 9% per year, respectively, between 2013 and 2018. During the study period around 72% of patients were treated in the Metropolitan areas of Lisbon and Porto and in the Central region. Intravitreal anti-VEGF treatment rates in 2018 were 560 per 100,000 population and presented high variability between municipalities. Higher anti-VEGF treatment rates at the municipality level were associated with shorter distances between their residence and the hospital. At the hospital level, higher ratio of ophthalmologists and higher organizational level were associated with higher anti-VEGF treatment rates. **Conclusion:** The number of episodes and patients treated with anti-VEGF injections has been growing in recent years. Proximity to health care, more access to ophthalmologists, and hospitals with higher organizational levels are associated with higher anti-VEGF treatment rates. Improving access is crucial to reduce regional discrepancies and ensure optimal treatment frequency, which may improve health outcomes.

**Keywords:** Anti-VEGF, Intravitreal injection, Access to eye care, Neovascular age-related macular degeneration, diabetic macular oedema

**Synopsis:** The number of episodes of anti-VEGF injections and treated patients increased between 2013 and 2018 in Portugal. Regional variations in treatment rates were associated with proximity to health care, ophthalmologists supply, and hospitals' organizational levels.

### Article Summary:

#### Strengths and limitations of the study

- This is an administrative database study using the universe of inpatient and day cases stays of National Health System (NHS) hospitals in Portugal between 2013 and 2018.
- For the characterization of anti-VEGF intravitreal injections, a selection of surgical codes (ICD-9-CM and ICD-10) for intravitreal procedures was used as a proxy for intravitreal anti-VEGF injections.
- Patient level data is available which, for e.g., makes it possible to analyse the real-world average number of injections per patient per year.
- This administrative database gives us the universe of the Portuguese NHS but excludes the private setting.
- Although clinical data are collected, this is not primarily a clinical database but an administrative database to inform financing of inpatient and day cases stays in NHS hospitals in Portugal.

## INTRODUCTION

The availability of anti-vascular endothelial growth factor (anti-VEGF) therapies represented a treatment shift for a range of ophthalmologic disorders, with a dramatic impact on serious conditions that were previously untreatable resulting in irreversible damages and loss of sight [1,2]. Anti-VEGF intravitreal injections act by reducing neovascular progression and were initially approved for the treatment of neovascular age-related macular degeneration (nAMD) [3,4]. Currently, anti-VEGF therapies are indicated for the treatment of a vast number of other ocular diseases such as diabetic macular oedema (DME), choroidal neovascularization (CNV), and retinal vein occlusion (RVO) [2]. Clinical trials have showed that anti-VEGF intravitreal injections prevented vision loss in the majority of patients and, in some cases, significantly improved vision [2,3,5]. The positive impact of anti-VEGF injections in visual outcomes [2,6–8] combined with the lack of previous efficient treatments, led to rapid diffusion of anti-VEGF treatments in many countries [4,6,9,10].

The main barriers for treatment with anti-VEGF are the high costs of the drugs, the need for multiple treatments, and the need for the treatments to be administered by specially trained personnel at hospitals [6,11]. Access is hindered in countries such as the United States [11] and in many Asian countries [6], where the drugs are not reimbursed by the health systems. Even in countries for which anti-VEGF treatments are reimbursed by the health system, such as England, Norway, and Portugal, studies report considerable geographic variation in treatment rates [4,10,12]. The study in Norway showed that the geographic variations in episode rates are challenges to the policy goals regarding equitable access and care, calling for further investigation [4]. The study in Portugal indicated that the number of hospital episodes related with anti-VEGF injections increased from 1,815 in 2001 to 25,106 in 2012, which is a mean annual increase of 32% [10].

In Portugal, Ranibizumab has been reimbursed by the NHS since 2008 [10], and by 2018 Bevacizumab and Aflibercept were also reimbursed [13]. Despite the equity-oriented nature of the Portuguese health system and the low co-payment values, a study covering the 2002-2012 period found unequal geographic distribution in treatment rates across the country [10]. Patients from regions without ophthalmology departments and lower population density received fewer treatments than other regions [10]. More recent estimates on the diffusion of anti-VEGF intravitreal injections are needed to understand how this treatment has expanded with the existence of additional elective pharmaceuticals.

Understanding the trends in anti-VEGF treatments in terms of number of episodes and patients is of great importance for assessing health technologies. Assessing access to and impact of health technologies is paramount in investigating the number of episodes and patients treated. Periodic investigations about access to health technologies is vital to prevent health inequalities and to learn how to proceed if different technologies arise. The aim of this study was twofold: to analyse the expansion of anti-VEGF intravitreal injections in the Portuguese NHS between 2013 and 2018 and to identify factors associated with geographic variation in treatment rates.

## MATERIALS AND METHODS

### Data source and inclusion/exclusion criteria

This observational study used an administrative database on hospital discharges from public hospital institutions in mainland Portugal, which includes information about sex, age, municipality of residence,

principal and secondary diagnosis and procedures, discharge hospital, and a unique patients' identifier from all inpatient and day case episodes. Use of this database was authorized for research purposes by the Portuguese Health System Central Administration (ACSS). The database is anonymized, guaranteeing the confidentiality of individuals, and it was therefore not necessary to obtain patients' consent or approval by an ethics committee for this study.

Episodes related to intravitreal injections with anti-VEGF between 2013 and 2018 were selected according to procedures records coded with International Classification of Diseases (ICD) 9th version- Clinical Modification (ICD-9CM) and ICD 10th version (ICD-10) for episodes registered from 2017. As in previous studies, ICD-9CM procedures codes 1474, 1475, 1479, and 149 and ICD10 procedures codes 3E0C30M and 3E0C3GC were used as proxy to anti-VEGF treatments [10,12]. Note, however, that these codes might also capture intravitreal injections for other drugs such as injectable antibiotics or corticosteroids [10,12].

Subsequently, the criteria for classification and exclusion of episodes were applied to assign a diagnosis for each episode. Episodes with missing data on sex, age, diagnosis and procedures, and discharge hospitals were excluded. ICD-10 bilateral episodes were counted as two injections, while the number of patients was counted as one. The *Supplementary Material- Appendix 1* contains details on the ICD codes used and the criteria to assign a diagnosis for each episode.

## Data analysis

We examined the number of episodes and patients treated by year, by diagnosis, and by region (according to patient's municipality of residence). The number of patients treated per year was estimated using the unique patients' identifier, regardless of whether they were already in treatment in the previous years or if they entered the database in that specific year. Then, using the patient as unit of observation, we computed the average number of injections per year for each diagnosis (nAMD, CNV, DME or RVO). Finally, we proceeded with the investigation of factors associated with geographic variations in anti-VEGF standardized treatment-rates.

Statistical analysis was conducted to investigate factors associated with geographic variations in anti-VEGF standardized treatment-rates. This ecological analysis was performed in two parts: the first had as unit of analysis the municipality of residence of the patient and in the second the unit of analysis was the hospital where the injection was performed. For analysis refinement, only patients aged 50 years or older were included in the analysis of associated factors, as the conditions for which anti-VEGF injections are indicated affects mostly people in this age category [2,12].

For the ecological analysis at the municipality level the rate of episodes related to intravitreal injections with anti-VEGF treatments per 100,000 population was the dependent variable. The independent variables analysed were patients' characteristics (mean age, proportion by sex, mean distance to hospital in kilometres - according to patient's municipality of residence and municipality where the hospital is located), and municipalities' characteristics (purchasing power, number of ophthalmologists per 20,000 persons, and number of ophthalmology consultations per 1,000 persons). The purchasing power variable is provided in relation to the national value, set equal to 100; and the purchasing power of the municipality can be a value above or below 100. The characteristics of the patients were retrieved from the hospital discharge database, and the characteristics of the municipality variables obtained from Statistics Portugal [14]. The mean distance to the hospital was obtained through Google Maps, as these represent the distance to be travelled by patients. For the characteristics of patients, municipalities were separated into two categories for each



1  
2  
3 year: “Higher rates” category for the municipalities with episode rates higher than the median and “Lower  
4 rates” category for the municipalities with episode rates lower than the median. The Mann-Whitney test  
5 was used to compare patients’ characteristics according to these two categories. For the characteristics of  
6 the municipalities, associations were analysed according to Spearman’s correlation analysis and  
7 multivariate linear regression models, with treatment rates as dependent variables and the independent  
8 variables (purchasing power, number of ophthalmologists per 20,000 persons, and number of  
9 ophthalmology consultations per 1,000 persons) added following the stepwise method.  
10  
11

12 For the ecological analysis at the hospital level, the dependent variable was the episode rates, and the  
13 independent variables were the number of ophthalmologists per 20,000 persons in the hospital’s catchment  
14 area and the organizational level of the hospital’s ophthalmology departments (hospitals’ ophthalmology  
15 units were divided into three groups, classified according to the general requirements established by the  
16 National Network of hospital specialties and referral for Ophthalmology [15], as shown in the  
17 *Supplementary Material- Appendix 2*). As these independent variables were not available per year, the years  
18 2013-2018 were collapsed into a single period of analysis. The association with ophthalmologist specialists  
19 was analysed using Spearman’s correlation analysis. The Kruskal-Wallis test was used to compare the  
20 episode rate between the three groups of hospitals. Hospitals in group III have a wider range of health care  
21 activities, longer opening hours, and greater equipment availability than hospitals in group II, and the same  
22 for group II in relation to group I hospitals. Data on number of ophthalmologists and more details on  
23 organizational level of hospitals by groups can be found in the report of the National network of hospital  
24 specialty and referral for Ophthalmology [15].  
25  
26  
27

28 A 5% significance level was adopted. Statistical analysis was performed using the IBM SPSS Statistics  
29 v26.  
30

### 31 **Patient and Public Involvement**

32 Patients or the public were not involved in the design, or conduct, or reporting, or dissemination plans of  
33 our research.  
34  
35

## 36 **RESULTS**

### 37 **Evolution, characteristics, and distribution of anti-VEGF treatments**

38 There were 298,429 episodes of anti-VEGF treatment between 2013 and 2018, and 65,534 patients treated.  
39 As illustrated in Figure 1, the number of episodes increased from 30,542 in 2013 to 64,867 in 2018, which  
40 corresponds to a mean annual increase of 16%. The number of patients treated in 2013 was 12,951, growing  
41 to 19,627 in 2018 (mean annual increase of 9%). In 2018, the anti-VEGF standardized treatment-rate was  
42 560 per 100,000 persons.  
43  
44  
45  
46  
47

48 Figure 1. Number of hospital episodes of anti-VEGF treatments and patients treated per year, from  
49 2013 to 2018. Portugal  
50

51 The majority of patients (71%) were treated with intravitreal anti-VEGF in the Metropolitan area of Lisbon,  
52 Central region, and Metropolitan area of Porto (Table 1). The Algarve had the lowest proportion of patients  
53 treated between 2013 to 2018 (2.6%). If we assume a homogeneous prevalence of these diseases across the  
54 country, the proportion of the population can be used as a proxy as those who would qualify for anti-VEGF  
55 therapy treatments in each area. There are substantial differences in the proportion of resident population  
56  
57  
58

and the proportion of patients treated with anti-VEGF injections in the Metropolitan area of Porto and Algarve region. Table S1 shows the proportion of patients treated with anti-VEGF injections, from 2013 and 2018, per region and per diagnosis (*Supplementary Material- Appendix 3*).

Table 1. Proportion of patients treated with anti-VEGF injections, between 2013 and 2018, per year, Portugal

| Region                      | 2013   | 2014   | 2015   | 2016   | 2017   | 2018   | Total  | Proportion population 2018 |
|-----------------------------|--------|--------|--------|--------|--------|--------|--------|----------------------------|
| Alentejo                    | 6.32%  | 6.46%  | 6.74%  | 7.51%  | 6.88%  | 7.54%  | 7.53%  | 7.21%                      |
| Algarve                     | 2.03%  | 1.97%  | 1.99%  | 2.71%  | 3.33%  | 3.21%  | 2.58%  | 4.49%                      |
| Metropolitan area of Lisbon | 23.72% | 23.03% | 23.59% | 23.50% | 23.96% | 23.64% | 24.32% | 29.10%                     |
| Metropolitan area of Porto  | 24.70% | 25.34% | 24.41% | 22.68% | 27.30% | 26.81% | 23.44% | 17.61%                     |
| Central region              | 25.73% | 24.77% | 25.39% | 25.39% | 17.22% | 18.35% | 23.69% | 22.66%                     |
| Northern region             | 17.50% | 18.44% | 17.88% | 18.20% | 21.31% | 20.46% | 18.43% | 18.92%                     |

As summarized in Table 2, the most common diagnosis was nAMD, followed by DME and RVO. These three diagnoses accounted for 70% of episodes. nAMD was the most common condition in every year analysed, except 2016, when DME was the most common.

Table 2. Total episodes of anti-VEGF between 2013 and 2018, by diagnosis and year, Portugal

| Diagnosis                                           | Total          |            |              | 2013          |            | 2014          |            | 2015          |            | 2016          |            | 2017          |            | 2018          |            |
|-----------------------------------------------------|----------------|------------|--------------|---------------|------------|---------------|------------|---------------|------------|---------------|------------|---------------|------------|---------------|------------|
|                                                     | N              | %          | % cumulative | N             | %          | N             | %          | N             | %          | N             | %          | N             | %          | N             | %          |
| Neovascular age-related macular degeneration (nAMD) | 100,168        | 33.57      | 33.57        | 11,575        | 37.90      | 13,415        | 36.32      | 16,357        | 33.60      | 16,094        | 28.95      | 20,857        | 33.74      | 21,87         | 33.72      |
| Diabetic macular edema (DME)                        | 85,997         | 28.82      | 62.38        | 6,578         | 21.54      | 8,044         | 21.78      | 13,371        | 27.47      | 18,181        | 32.70      | 19,769        | 31.98      | 20,054        | 30.92      |
| Retinal vein occlusion (RVO)                        | 18,716         | 6.27       | 68.65        | 1,451         | 4.75       | 2,104         | 5.70       | 2,841         | 5.84       | 3,500         | 6.30       | 3,956         | 6.40       | 4,864         | 7.50       |
| Unspecified macular degeneration                    | 16,042         | 5.38       | 74.03        | 1,750         | 5.73       | 1,862         | 5.04       | 2,712         | 5.57       | 3,979         | 7.16       | 2,724         | 4.41       | 3,015         | 4.65       |
| Proliferative diabetic retinopathy                  | 15,737         | 5.27       | 79.30        | 1,846         | 6.04       | 2,297         | 6.22       | 2,726         | 5.60       | 2,144         | 3.86       | 3,250         | 5.26       | 3,474         | 5.36       |
| Choroidal neovascularization (CNV)                  | 13,783         | 4.62       | 83.92        | 1,698         | 5.56       | 2,190         | 5.93       | 2,619         | 5.38       | 3,040         | 5.47       | 2,154         | 3.48       | 2,082         | 3.21       |
| Retinal edema                                       | 12,581         | 4.22       | 88.14        | 1,256         | 4.11       | 1,890         | 5.12       | 1,690         | 3.47       | 1,677         | 3.02       | 2,575         | 4.17       | 3,493         | 5.38       |
| Other diagnosis                                     | 35,405         | 11.86      | 100          | 4,388         | 14.37      | 5,129         | 13.89      | 6,361         | 13.07      | 6,979         | 12.55      | 6,533         | 10.57      | 6,015         | 9.27       |
| <b>Total</b>                                        | <b>298,429</b> | <b>100</b> |              | <b>30,542</b> | <b>100</b> | <b>36,931</b> | <b>100</b> | <b>48,677</b> | <b>100</b> | <b>55,594</b> | <b>100</b> | <b>61,818</b> | <b>100</b> | <b>64,867</b> | <b>100</b> |

Table 3 summarizes the average increase in the number of injections per year per patient, by diagnosis. The highest number of injections per year per patient was for nAMD, which increased from 2.72 in 2013 to 3.37 in 2018. In contrast, CNV had the lowest values, reaching 2.01 injections per year per patient in 2018.

Table 3. Average number of injections per year per patient, by diagnosis, 2013 to 2018, Portugal

| Diagnosis | 2013 | 2014 | 2015 | 2016 | 2017 | 2018 |
|-----------|------|------|------|------|------|------|
| nAMD      | 2.72 | 2.77 | 2.96 | 2.72 | 3.4  | 3.37 |
| DME       | 2.33 | 2.32 | 2.64 | 2.88 | 2.77 | 2.80 |
| CNV       | 1.35 | 1.43 | 1.41 | 1.51 | 2.06 | 2.01 |
| RVO       | 1.88 | 2.08 | 2.25 | 2.38 | 2.42 | 2.48 |

### Factors associated with geographic distribution of anti-VEGF injections

Table 4 shows the comparison of characteristics of patients at the municipality level. In 2016, patients treated with anti-VEGF intravitreal injections who lived in municipalities with episode rates higher than the median (“Higher rates” category) were older. In 2013, municipalities in the “Higher” category had a significantly higher proportion of females. For the distance between municipality of residence and hospital, significant differences were found for all years, with the average distance being shorter for municipalities in the “Higher” category.

Table 4. Mann-Whitney test for individual variables by municipality category

| Year | Age                           |                               |              |              | Sex (proportion of men)        |                                |              |              | Distance in Kilometres         |                                |              |                  |
|------|-------------------------------|-------------------------------|--------------|--------------|--------------------------------|--------------------------------|--------------|--------------|--------------------------------|--------------------------------|--------------|------------------|
|      | Mean (standard deviation)     |                               | U            | signif.      | Mean (standard deviation)      |                                | U            | signif.      | Mean (standard deviation)      |                                | U            | signif.          |
|      | Lower rates                   | Higher rates                  |              |              | Lower rates                    | Higher rates                   |              |              | Lower rates                    | Higher rates                   |              |                  |
| 2013 | 70.70<br>(4.64)               | 71.43<br>(2.65)               | 8737         | 0.168        | <b>0.511</b><br><b>(0.214)</b> | <b>0.465</b><br><b>(0.130)</b> | <b>8256*</b> | <b>0.036</b> | <b>88.50</b><br><b>(50.25)</b> | <b>46.13</b><br><b>(30.58)</b> | <b>4187*</b> | <b>&lt;0.001</b> |
| 2014 | 70.90<br>(4.50)               | 71.02<br>(2.64)               | 9466         | 0.772        | 0.499<br>(0.198)               | 0.486<br>(0.121)               | 9025         | 0.343        | <b>84.11</b><br><b>(52.25)</b> | <b>46.08</b><br><b>(32.22)</b> | <b>4835*</b> | <b>&lt;0.001</b> |
| 2015 | 70.62<br>(4.07)               | 71.35<br>(2.92)               | 8553         | 0.098        | 0.519<br>(0.179)               | 0.486<br>(0.110)               | 8484         | 0.079        | <b>81.04</b><br><b>(51.11)</b> | <b>42.62</b><br><b>(25.65)</b> | <b>4701*</b> | <b>&lt;0.001</b> |
| 2016 | <b>70.58</b><br><b>(3.71)</b> | <b>71.61</b><br><b>(2.62)</b> | <b>7656*</b> | <b>0.004</b> | 0.500<br>(0.169)               | 0.503<br>(0.099)               | 9218         | 0.576        | <b>73.52</b><br><b>(49.44)</b> | <b>40.99</b><br><b>(28.36)</b> | <b>5098*</b> | <b>&lt;0.001</b> |
| 2017 | 72.30<br>(5.37)               | 71.66<br>(2.71)               | 7826         | 0.135        | 0.480<br>(0.244)               | 0.511<br>(0.127)               | 7989         | 0.218        | <b>69.69</b><br><b>(53.74)</b> | <b>41.89</b><br><b>(32.51)</b> | <b>6238*</b> | <b>&lt;0.001</b> |
| 2018 | 72.26<br>(4.70)               | 72.02<br>(2.56)               | 8553         | 0.449        | 0.523<br>(0.233)               | 0.484<br>(0.107)               | 8246         | 0.216        | <b>82.88</b><br><b>(72.94)</b> | <b>66.42</b><br><b>(65.37)</b> | <b>7586*</b> | <b>0.002</b>     |

In the bivariate correlation analysis of the rate of anti-VEGF treatments with the independent ecological variables, a positive correlation was found for: purchasing power in the years 2016 (p-value <0.001) and 2018 (p-value <0.001); rate of ophthalmologists in 2015 (p-value = 0.042) and 2016 (p-value = 0.016); ophthalmology consultations in all hospitals in 2013 (p-value = 0.047) and 2016 (p-value = 0.018), and consultations in public hospitals in 2013 (p-value = 0.040) and in 2016 (p-value = 0.030). (Table S2. Supplementary Material- Appendix 3).

Stepwise linear regression models were generated for each year. Between 2013 and 2015 the variable ophthalmology consultations was included with a positive coefficient. For 2016 to 2018, the variable that remained in the model was purchasing power, with a positive coefficient. The models had low adjusted R<sup>2</sup>

(the highest was 0.043 in 2018) and the analysis of residues was inconclusive regarding the quality of the models. (Table S3. Supplementary Material- Appendix 3).

In the ecological analysis at the hospital level, the bivariate Spearman's correlation between the rate of anti-VEGF treatments between 2013 and 2018 and the ratio of ophthalmologists had a positive correlation ( $\rho = 0,359$ ;  $n = 40$ ;  $p\text{-value} = 0.023$ ). The Kruskal-Wallis test showed a statistically significant difference in episode rates with anti-VEGF according to the hospital's organizational level ( $H(2) = 7.054$ ;  $p\text{-value} = 0.029$ ). More specifically, the results indicate that hospitals in group III had a higher episode rate than hospitals in group II. These, in turn, had higher episode rates than group I hospitals.

## DISCUSSION

The aim of this study was to analyse the expansion of anti-VEGF intravitreal treatments in the Portuguese NHS and to identify factors associated with geographic variations. Results indicate that access to treatment with anti-VEGF injection has been increasing in Portugal, and that they were first used to treat nAMD, followed by DME, CNV, and RVO. An increase in the number of injections per patient per year was observed for all diagnoses. More than half of the episodes with anti-VEGF were recorded in the metropolitan areas of Lisbon and Porto.

Given the positive impact of anti-VEGF injections on health outcomes for many ocular neovascular diseases, the expansion in injections performed and patients treated seems justified. The evolution of anti-VEGF treatments found from 2013 to 2018 was consistent with values reported by Marques et al. [10] from 2002 to 2012. The total number of injections per year in Portugal varied from less than 2,000 to over 60,000 in 16 years. As anti-VEGF injections are covered by the Portuguese NHS [10,13,16] and are safe and highly effective [17], there are reasons to expect that this upward tendency will continue to be observed in the coming years.

Neovascular AMD and DME diagnosis corresponded to 63% of episodes associated with anti-VEGF treatment between 2013 and 2018. An analysis of the literature revealed that AMD was the eye pathology most often addressed in scientific publications between 2013 and 2018 [18], and it was the most common condition for which anti-VEGF intravitreal injections were used in countries like England [12], Norway [4], and the United States [19].

The number of injections per year per patient for nAMD increased within the period analysed, reaching 3.37 injections per year in 2018. The on-label treatment guidelines for treatment of nAMD for both Ranibizumab and Aflibercept supported monthly injections in the first three months followed by treat and extend regimen (flexible, according to the needs of the patient) [20,21]. Therefore, in a first year of treatment, it would correspond to between 6 to 12 injections (due to loading dose), while in the second year and thereafter it would correspond to 4 to 12 injections. Although there was no information on which drug was used to treat the patients analysed, the values of the on-label standards are greater than what was observed in this study. This low frequency of injections per year was also found in Portugal before 2013 [10], England (2.7 in 2008) [12], and Norway (4.1 in 2015) [4]. On the one hand, these results may indicate difficulties to access the treatment, leaving patients undertreated [22–25]. On the other hand, some clinical studies indicate that variable frequency of anti-VEGF injections is also effective in the treatment of nAMD, and therefore this flexible regimen may have been increasingly adopted [1,26].

1  
2  
3 The geographic variations in episode rates in Portugal observed between 2002 and 2012 were associated  
4 with the availability of anti-VEGF therapies and ophthalmology services, as well as population density  
5 [10]. These results indicate that patients from distant cities or rural areas may have delayed access to  
6 treatments and were more likely to miss follow-up appointments [10]. The findings for the period from  
7 2013 to 2018 corroborate this possibility, as the distance between municipality of residence and hospital  
8 was significantly different between municipalities with higher and lower episode rates. A systematic review  
9 of factors associated with non-adherence to anti-VEGF treatment has also identified greater distance to  
10 hospital as a potential contributing factor [27]. Lower numbers of ophthalmologist and consultations were  
11 also associated with lower episode rates.  
12  
13

14  
15 Similar results were found in Norway [4] and England [12]. National rates of intravitreal injections in  
16 England had a 50-fold variation in age-standardized rates between regions [12]. In Norway, the age adjusted  
17 number of episodes across counties varied from 19 to 55 per 1,000 persons aged 50 years or older [4]. These  
18 studies demonstrated challenges associated with the arrival of this treatment that include frequent and long-  
19 term administration and high allocation of resources. Despite the effort to guarantee geographical equity of  
20 access afforded by the health systems in England, Norway, and Portugal, the variations in anti-VEGF rates  
21 indicate that challenges remain.  
22  
23

24 Because anti-VEGF drugs are injected directly into the vitreous body, there are requirements for use of this  
25 treatment that can include specialized training and the setting up of a location dedicated to injection [28].  
26 These requirements might be difficult to achieve in small hospitals due to financial or technical limitations  
27 [10]. The results showed significant differences in anti-VEGF treatment rates between hospitals, according  
28 to the number of specialists and their organizational level.  
29  
30

31 The present study has found that despite the considerable expansion of anti-VEGF treatments between 2013  
32 and 2018 in Portugal, geographic variations still remain. Substantial treatment coverage discrepancies may  
33 be observed among regions, if we assume that prevalence does not change across the Portuguese territory  
34 and if we compare the percentages of residents, at the same age group, and the percentages of patients  
35 treated with an anti-VEGF in each region. In a previous study [10], it was shown that people in the rural  
36 areas were receiving less treatments. It is possible to speculate that the needs for treatments are likely to be  
37 similar in urban and rural areas. Although the methodology chosen did not produce robust evidence to  
38 accurately identify the reasons behind these variations, there are strong indications that barriers previously  
39 discussed by Marques et al [10] and also observed in England [12] and Norway [4] are possibly a root  
40 cause, and in any event remain a challenge.  
41  
42

43 Strengths of this study reside in the use of nationwide information and long period of analysis. The  
44 geographical and temporal analysis performed produced important results to monitor the diffusion of anti-  
45 VEGF treatments in Portugal, while raising awareness of persisting inequalities. The statistical methods  
46 employed allowed the identification of factors that should be addressed to ensure the treatment of patients  
47 with ophthalmologic needs. However, there are also limitations associated with its use that are important  
48 to mention. The procedures and ICD codes were used as a proxy to identify episodes with anti-VEGF and  
49 the associated diagnosis, since there are no further details about the intravitreal injection such as the drugs  
50 used in each episode. Thus, it is possible that in some cases anti-VEGF have not been administered,  
51 overestimating the findings reported herein. Additionally, the administrative database used is not primarily  
52 a clinical database. Clinical data are collected to inform financing of inpatient and day cases stays in NHS  
53 hospitals in Portugal, thus procedures carried out in the autonomous regions of Azores and Madeira are  
54  
55  
56  
57  
58  
59  
60



1  
2  
3 excluded. The database does not comprise episodes of intravitreal anti-VEGF injected at the private setting.  
4 There is also no available information for other relevant clinical data (e.g. smoking behaviour,  
5 cardiovascular diseases and previous cardiovascular events, blood pressure, cholesterol and medication  
6 use). Future studies may collect more accurate information on episodes to ensure correspondence to anti-  
7 VEGF intravitreal injections and clinical characteristics of patients. At the time of analysis, data for 2017  
8 and 2018 were provisional, as two hospitals had underreported information.  
9  
10

## 11 **CONCLUSION**

12  
13 The development of anti-VEGF drugs has brought effective treatment for retinal diseases that can lead to  
14 severe visual impairment. This study shows that the number of episodes related to anti-VEGF treatment as  
15 well as the number of treated patients increased between 2013 and 2018. However, the distribution of  
16 treatment with anti-VEGF showed regional asymmetries. Factors such as proximity to health care, greater  
17 access to ophthalmologists and hospitals having ophthalmologic departments with more human resources,  
18 more equipment, and higher differentiation level were associated with higher rates of anti-VEGF treatment.  
19 Improving access to treatment is crucial to address the regional discrepancies found and to ensure that  
20 treatment follows patients' clinical needs and enhances better health outcomes. The increasing number of  
21 treatment episodes related to anti-VEGF, the low number of injections per patient per year, and the regional  
22 discrepancies detected impose challenges to the NHS in terms of budget and access. Given the ageing of  
23 the population and the fact that more anti-VEGF drugs have been developed and approved, both demand  
24 and supply of these treatments are likely to increase.  
25  
26  
27

## 28 **DECLARATIONS**

### 29 **Author's contribution**

30  
31 APM, MAS, PAL, RS conceived and designed the study. JVR, APM had full access to the data and  
32 conducted initial analysis. JVR, APM, MAS, ASA, JF conducted the analysis and interpreted the results.  
33 AFM, PAL advised on interpretation of the results. JVR, MP drafted the manuscript. AFM, ASA, JF  
34 participated in the discussions and provided the clinical feedback. MAS, RS provided critical feedback to  
35 the manuscript. All the authors revised the manuscript for important intellectual content, contributed to the  
36 data interpretation and writing, and critically reviewed the manuscript at all stages and approved the final  
37 copy.  
38  
39  
40

### 41 **Patient consent for publication**

42  
43 Obtaining informed consent was not required under national regulations because the patient data were  
44 anonymized.  
45

### 46 **Ethics approval statement**

47  
48 Obtaining approval by an ethics board was not required under national regulations because the patient data  
49 were anonymized.  
50

### 51 **Data availability statement**

52  
53 The data of hospitalizations are the property of Central Administration of the Health System (Administração  
54 Central do Sistema de Saúde (ACSS), I.P.). However the data are available from the authors upon request  
55 and with permission of the ACSS. The data of hospitalizations are not publicly available, however the  
56  
57



1  
2  
3 authors confirm that interested researchers can ask for access to these data by contacting ACSS directly at  
4 the following: Parque da Saúde da Lisboa, Edifício 16, Avenida do Brasil, 53 1700-063 Lisboa, Portugal  
5 (e-mail: [geral@acss.min-saude.pt](mailto:geral@acss.min-saude.pt)).  
6

### 7 **Competing interests statement**

8  
9 M Afonso-Silva, P A. Laires, A S. Almeida, J Fernandes, and M Pardal are employees of Novartis Farma,  
10 Produtos Farmacêuticos SA, Porto Salvo, Portugal, the funder the study. Novartis is the manufacturer of  
11 Brolocizumab and Ranibizumab.  
12

### 13 **Funding**

14  
15 This analysis was funded by Novartis Farma, Produtos Farmacêuticos SA- No grant number.  
16

### 17 **Acknowledgements**

18  
19 We acknowledge the Central Administration of the Health System for providing the hospital morbidity  
20 database.  
21

### 22 **REFERENCES**

- 23  
24 1. Khanna S, Komati R, Eichenbaum DA, Hariprasad I, Ciulla TA, Hariprasad SM. Current and  
25 upcoming anti-VEGF therapies and dosing strategies for the treatment of neovascular AMD: A  
26 comparative review. *BMJ Open Ophthalmology*. 2019.
- 27  
28 2. Tah V, Orlans HO, Hyer J, Casswell E, Din N, Sri Shanmuganathan V, et al. Anti-VEGF therapy  
29 and the retina: An update. *Journal of Ophthalmology*. 2015.
- 30  
31 3. Lim LS, Mitchell P, Seddon JM, Holz FG, Wong TY. Age-related macular degeneration. *Lancet*.  
32 2012;
- 33  
34 4. Kristiansen IS, Haugli Bråten R, Jørstad ØK, Moe MC, Sæther EM. Intravitreal therapy for retinal  
35 diseases in Norway 2011–2015. *Acta Ophthalmol*. 2020;
- 36  
37 5. Gemenetzi M, Patel PJ. A Systematic Review of the Treat and Extend Treatment Regimen with  
38 Anti-VEGF Agents for Neovascular Age-Related Macular Degeneration. *Ophthalmology and  
39 Therapy*. 2017.
- 40  
41 6. Lai TYY, Cheung CMG, Mieler WF. Ophthalmic application of anti-VEGF therapy. *Asia-Pacific  
42 Journal of Ophthalmology*. 2017.
- 43  
44 7. Rofagha S, Bhisitkul RB, Boyer DS, Sadda SR, Zhang K. Seven-year outcomes in ranibizumab-  
45 treated patients in ANCHOR, MARINA, and HORIZON: A multicenter cohort study (SEVEN-  
46 UP). *Ophthalmology*. 2013;
- 47  
48 8. Bressler NM, Chang TS, Suñer IJ, Fine JT, Dolan CM, Ward J, et al. Vision-Related Function  
49 after Ranibizumab Treatment by Better- or Worse-Seeing Eye. *Clinical Trial Results from  
50 MARINA and ANCHOR*. *Ophthalmology*. 2010;
- 51  
52 9. Stein JD, Hanrahan BW, Comer GM, Sloan FA. Diffusion of technologies for the care of older  
53 adults with exudative age-related macular degeneration. *Am J Ophthalmol*. 2013;
- 54  
55 10. Marques AP, Macedo AF, Perelman J, Aguiar P, Rocha-Sousa A, Santana R. Diffusion of anti-  
56 VEGF injections in the Portuguese National Health System. *BMJ Open*. 2015;
- 57  
58 11. Erie JC, Barkmeier AJ, Hodge DO, Mahr MA. High Variation of Intravitreal Injection Rates and  
59 Medicare Anti-Vascular Endothelial Growth Factor Payments per Injection in the United States.  
60 *Ophthalmology*. 2016;
12. Keenan TDL, Wotton CJ, Goldacre MJ. Trends over time and geographical variation in rates of  
intravitreal injections in England. *Br J Ophthalmol*. 2012;
13. Administração Central do Sistema de Saúde, INFARMED, Serviços Partilhados do Ministério da

- Saúde. Circular informativa conjunta N° 8/2016/ACSS/INFARMED/SPMS [Internet]. 2016 [cited 2020 Dec 3]. Available from: [http://www2.acss.min-saude.pt/Portals/0/Circular conjunta 08\\_SPMS\\_ACSS\\_INFARMED \(2\).pdf](http://www2.acss.min-saude.pt/Portals/0/Circular%20conjunta%2008_SPMS_ACSS_INFARMED%20(2).pdf)
14. Instituto Nacional de Estatística. Estatísticas- População e Sociedade- Saúde [Internet]. [cited 2020 Jun 3]. Available from: [https://www.ine.pt/xportal/xmain?xpgid=ine\\_tema&xpid=INE&tema\\_cod=1117](https://www.ine.pt/xportal/xmain?xpgid=ine_tema&xpid=INE&tema_cod=1117)
  15. Serviço Nacional de Saúde. Rede nacional de especialidade hospitalar e de referência de oftalmologia [Internet]. 2016. Available from: [https://www.sns.gov.pt/wp-content/uploads/2016/05/Proposta-RNEHR-Oftalmologia-2016-ACSS-1\\_VFfinal.pdf](https://www.sns.gov.pt/wp-content/uploads/2016/05/Proposta-RNEHR-Oftalmologia-2016-ACSS-1_VFfinal.pdf)
  16. INFARMED. Relatório público de avaliação (BEOVU- Brolucizumab) [Internet]. 2021. Available from: <https://www.infarmed.pt/documents/15786/1424140/Relatório+de+avaliação+de+financiamento+público+de+Beovu+%28DCI%3A+brolucizumab%29+2021/02da132e-8bf4-fb93-e744-4f64ed596470>
  17. Moisseiev E, Loewenstein A. Abicipar pegol—a novel anti-VEGF therapy with a long duration of action. *Eye* [Internet]. 2020 Apr 19;34(4):605–6. Available from: <http://www.nature.com/articles/s41433-019-0584-y>
  18. Yeung AWK, Abdel-Daim MM, Abushouk AI, Kadonosono K. A literature analysis on anti-vascular endothelial growth factor therapy (anti-VEGF) using a bibliometric approach. *Naunyn-Schmiedeberg's Archives of Pharmacology*. 2019.
  19. Parikh R, Ross JS, Sangaralingham LR, Adelman RA, Shah ND, Barkmeier AJ. Trends of Anti-Vascular Endothelial Growth Factor Use in Ophthalmology Among Privately Insured and Medicare Advantage Patients. *Ophthalmology*. 2017.
  20. European Medicines Agency. Eylea [Internet]. 2020. Available from: [https://www.ema.europa.eu/en/documents/overview/eylea-epar-medicine-overview\\_en.pdf](https://www.ema.europa.eu/en/documents/overview/eylea-epar-medicine-overview_en.pdf)
  21. European Medicines Agency. Lucentis [Internet]. 2018. Available from: [https://www.ema.europa.eu/en/documents/overview/lucentis-epar-medicine-overview\\_en.pdf](https://www.ema.europa.eu/en/documents/overview/lucentis-epar-medicine-overview_en.pdf)
  22. Holekamp NM, Liu Y, Yeh WS, Chia Y, Kiss S, Almony A, et al. Clinical utilization of anti-VEGF agents and disease monitoring in neovascular age-related macular degeneration. *Am J Ophthalmol*. 2014;
  23. Monés J, Singh RP, Bandello F, Souied E, Liu X, Gale R. Undertreatment of Neovascular Age-Related Macular Degeneration after 10 Years of Anti-Vascular Endothelial Growth Factor Therapy in the Real World: The Need for A Change of Mindset. *Ophthalmologica*. 2020;
  24. Holz FG, Tadayoni R, Beatty S, Berger A, Cereda MG, Cortez R, et al. Multi-country real-life experience of anti-vascular endothelial growth factor therapy for wet age-related macular degeneration. *Br J Ophthalmol*. 2015;
  25. Ciulla TA, Hussain RM, Pollack JS, Williams DF. Visual Acuity Outcomes and Anti-Vascular Endothelial Growth Factor Therapy Intensity in Neovascular Age-Related Macular Degeneration Patients. *Ophthalmol Retin* [Internet]. 2020 Jan;4(1):19–30. Available from: <https://linkinghub.elsevier.com/retrieve/pii/S2468653019302805>
  26. Holz FG, Amoaku W, Donate J, Guymer RH, Kellner U, Schlingemann RO, et al. Safety and efficacy of a flexible dosing regimen of ranibizumab in neovascular age-related macular degeneration: The SUSTAIN study. *Ophthalmology*. 2011;
  27. Ehlken C, Ziemssen F, Eter N, Lanzl I, Kaymak H, Lommatzsch A, et al. Systematic review: non-adherence and non-persistence in intravitreal treatment. *Graefe's Archive for Clinical and Experimental Ophthalmology*. 2020.
  28. Michels S, Becker M, Wachtlin J, Binder S. The intravitreal injection: Variations in regulations, cost and reimbursement in Europe. *Spektrum der Augenheilkd*. 2012;(26):2–6.

1  
2  
3  
4  
5  
6  
7  
8  
9  
10  
11  
12  
13  
14  
15  
16  
17  
18  
19  
20  
21  
22  
23  
24  
25  
26  
27  
28  
29  
30  
31  
32  
33  
34  
35  
36  
37  
38  
39  
40  
41  
42  
43  
44  
45  
46  
47  
48  
49  
50  
51  
52  
53  
54  
55  
56  
57  
58  
59  
60

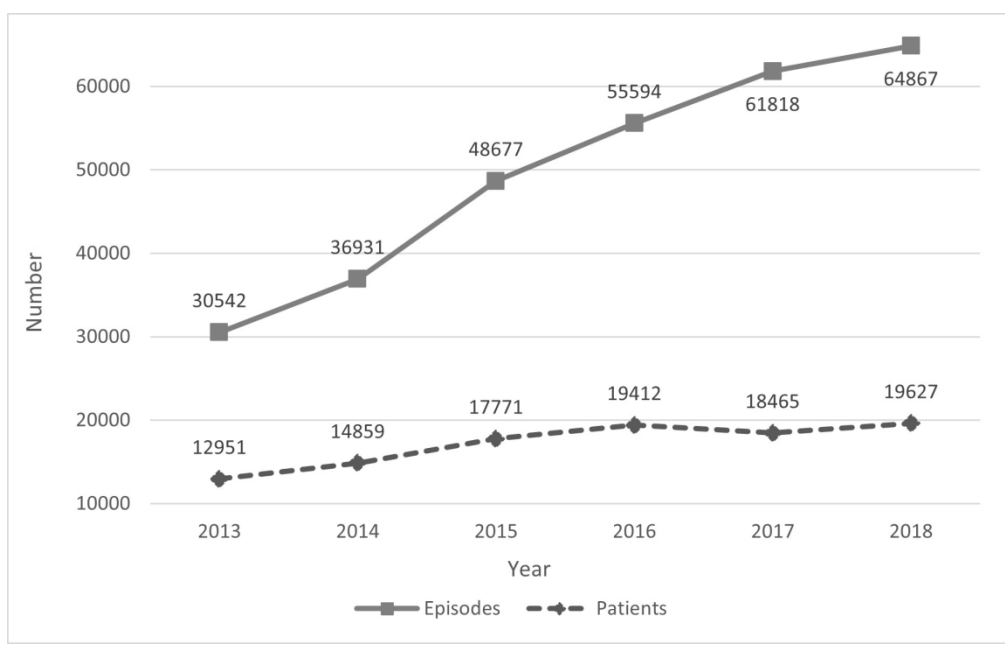

## Appendix 1

Table 1. ICD Procedure codes used to select episodes related to intravitreal injections with anti-VEGF

| ICD version | Code    | Denomination                                                                |
|-------------|---------|-----------------------------------------------------------------------------|
| ICD-9       | 1474    | Other mechanical vitrectomy                                                 |
| ICD-9       | 1475    | Injection of vitreous substitute                                            |
| ICD-9       | 1479    | Other operations on vitreous                                                |
| ICD-9       | 149     | Other operations on retina, choroid and posterior chamber                   |
| ICD-10      | 3E0C30M | Introduction of monoclonal antibody into eye, percutaneous approach),       |
| ICD-10      | 3E0C3GC | Introduction of other therapeutic substance into eye, percutaneous approach |

### IDENTIFICATION OF INTRAVITREAL ANTI-VEGF TREATMENT EVENTS FOR ICD-9

#### 1. Main indications

##### Indication: DIABETIC MACULAR EDEMA (DME)

Numerator: Discharges, with either:

- A principal diagnosis code for Diabetic Macular Edema (**DIMAED**) or
- A principal diagnosis code for Other Relevant Conditions (**OTRECO**) and any secondary diagnosis codes for Diabetic Macular Edema (**DIMAED**).

##### Indication: RETINAL VEIN OCCLUSION (RVO)

##### Indication: RETINAL VEIN OCCLUSION (CENTRAL)

Numerator: Discharges, with either:

- A principal diagnosis code for Retinal Vein Occlusion- Central (**RVOCEN**) or
- A principal diagnosis code for Other Relevant Conditions (**OTRECO**) and any secondary diagnosis codes for Retinal Vein Occlusion- Central (**RVOCEN**).

##### Indication: RETINAL VEIN OCCLUSION (BRANCH)

Numerator: Discharges, with either:

- A principal diagnosis code for Retinal Vein Occlusion- Branch (**RVOBRA**) or
- A principal diagnosis code for Other Relevant Conditions (**OTRECO**) and any secondary diagnosis codes for Retinal Vein Occlusion- Branch (**RVOBRA**).

##### Indication: NEOVASCULAR AGE-RELATED MACULAR DEGENERATION (nAMD)

Numerator: Discharges, with either:

- A principal diagnosis code for Exudative age-related macular degeneration (**EXARMD**) or
- A principal diagnosis code for Other Relevant Conditions (**OTRECO**) and any secondary diagnosis codes for Exudative age-related macular degeneration (**EXARMD**) or for Macular puckering (**MACPUC**), or

- A principal diagnosis code for Other Conditions of the Retina and Choroid (**OCRECH**) or for Cystoid Macular Degeneration (**CYMADE**) or for Unspecified Macular Degeneration (**UNMADE**) and any secondary diagnosis codes for Exudative age-related macular degeneration (**EXARMD**) or for Macular puckering (**MACPUC**).

**Indication: CHOROIDAL NEOVASCULARIZATION (CNV)**

**Numerator: Discharges with either:**

- A principal diagnosis code for Retinal neovascularization or Myopia (**RNVMYO**) or
- A principal diagnosis code for Other Relevant Conditions (**OTRECO**) and any secondary diagnosis codes for Retinal neovascularization or Myopia (**RNVMYO**) or
- A principal diagnosis for Other Conditions of the Retina and Choroid (**OCRECH**) and any secondary diagnosis, except if admission is for Indication neovascular age-related Macular Degeneration (**AMD**).
- A principal diagnosis code for Other Relevant Conditions (**OTRECO**) and any secondary diagnosis codes for Other Conditions of the Retina and Choroid (**OCRECH**), except if admission is for Indication neovascular age-related Macular Degeneration (**AMD**).

**2. Other indications**

**Indication: OTHER VASCULAR OCCLUSIONS**

*\*This indication is not included in Retinal Vein Occlusion*

Numerator: Discharges, with either:

- A principal diagnosis code for Other Vascular Occlusions (**OTVAOC**) or
- A principal diagnosis code for Other Relevant Conditions (**OTRECO**) and any secondary diagnosis codes for Retinal Vein Occlusion (**OTVAOC**).

**Indication: ATROPHIC MACULAR DEGENERATION**

*\* This indication is not included in Neovascular Age-Related Macular Degeneration*

Numerator: Discharges, with either:

- A principal diagnosis code for Atrophic Macular Degeneration (**ATMADE**) or
- A principal diagnosis code for Other Relevant Conditions (**OTRECO**) and any secondary diagnosis codes for Atrophic Macular Degeneration (**ATMADE**).

**Indication: CYSTOID MACULAR DEGENERATION**

*\* This indication is not included in Neovascular Age-Related Macular Degeneration*

Numerator: Discharges, with either:

- A principal diagnosis code for Cystoid Macular Degeneration (**CYMADE**) and any secondary diagnosis codes, except for Exudative age-related macular degeneration (**EXARMD**) or for Macular puckering (**MACPUC**) or for Atrophic Macular Degeneration (**ATMADE**); and patient aged less than 50 years old.

**Indication: UNSPECIFIED MACULAR DEGENERATION**

\* This indication is not included in Neovascular Age-Related Macular Degeneration

Numerator: Discharges, with either:

- A principal diagnosis code for Unspecified Macular Degeneration (**UNMADE**) and any secondary diagnosis codes, except for Exudative age-related macular degeneration (**EXARMD**) or for Macular puckering (**MACPUC**) or for Atrophic Macular Degeneration (**ATMADE**), or
- A principal diagnosis code for Cystoid Macular Degeneration (**CYMADE**) and any secondary diagnosis codes, except for Exudative age-related macular degeneration (**EXARMD**) or for Macular puckering (**MACPUC**) or for Atrophic Macular Degeneration (**ATMADE**); and patient aged 50 years old or more.

### 3. Diabetes with ophthalmic manifestations not stated as uncontrolled

For episodes with principal diagnosis codes 25050 and 25052, not classified as any indication above, the following criteria applies:

| If any secondary diagnosis code: | Indication                            |
|----------------------------------|---------------------------------------|
| 36201                            | Unspecified Diabetic Retinopathy      |
| 36202                            | Proliferative Diabetic Retinopathy    |
| 36203 to 36206                   | Nonproliferative Diabetic Retinopathy |
| Other diagnosis code             | The secondary diagnosis code          |
| No diagnosis code                | 25050 or 25052                        |

### 4. Other relevant diagnosis to be included

For episodes with the principal diagnosis codes below, not classified as any indication above, the indication is the principal diagnosis itself:

|       |                                                                                                            |
|-------|------------------------------------------------------------------------------------------------------------|
| 3612  | Serous retinal detachment                                                                                  |
| 3619  | Unspecified retinal detachment                                                                             |
| 25000 | Diabetes mellitus without mention of complication, type II or unspecified type, not stated as uncontrolled |
| 25052 | Diabetes with ophthalmic manifestations, type II or unspecified type, uncontrolled                         |
| 25053 | Diabetes with ophthalmic manifestations, type I [juvenile type], uncontrolled                              |
| 36100 | Retinal detachment with retinal defect, unspecified                                                        |
| 36101 | Recent retinal detachment, partial, with single defect                                                     |
| 36102 | Recent retinal detachment, partial, with multiple defects                                                  |
| 36103 | Recent retinal detachment, partial, with giant tear                                                        |
| 36105 | Recent retinal detachment, total or subtotal                                                               |
| 36106 | Old retinal detachment, partial                                                                            |
| 36107 | Old retinal detachment, total or subtotal                                                                  |
| 36181 | Traction detachment of retina                                                                              |
| 36189 | Other forms of retinal detachment                                                                          |
| 36210 | Background retinopathy, unspecified                                                                        |
| 36212 | Exudative retinopathy                                                                                      |
| 36215 | Retinal telangiectasia                                                                                     |

|    |       |                                                      |
|----|-------|------------------------------------------------------|
| 1  |       |                                                      |
| 2  |       |                                                      |
| 3  | 36216 | Retinal neovascularization NOS                       |
| 4  | 36240 | Retinal layer separation, unspecified                |
| 5  | 36242 | Serous detachment of retinal pigment epithelium      |
| 6  | 36243 | Hemorrhagic detachment of retinal pigment epithelium |
| 7  | 36254 | Macular cyst, hole, or pseudohole                    |
| 8  | 36257 | Drusen (degenerative)                                |
| 9  | 36281 | Retinal hemorrhage                                   |
| 10 | 36283 | Retinal edema                                        |
| 11 | 36442 | Rubeosis iridis                                      |
| 12 | 36474 | Adhesions and disruptions of pupillary membranes     |
| 13 | 37060 | Corneal neovascularization, unspecified              |
| 14 | 37923 | Vitreous hemorrhage                                  |
| 15 | 37924 | Other vitreous opacities                             |
| 16 | 37925 | Vitreous membranes and strands                       |
| 17 | 37929 | Other disorders of vitreous                          |
| 18 |       |                                                      |
| 19 |       |                                                      |
| 20 |       |                                                      |
| 21 |       |                                                      |
| 22 |       |                                                      |
| 23 |       |                                                      |
| 24 |       |                                                      |
| 25 |       |                                                      |
| 26 |       |                                                      |
| 27 |       |                                                      |
| 28 |       |                                                      |

#### 5. Other relevant diagnosis to be excluded

For episodes with the principal diagnosis codes below, not classified as any indication above, the episode is excluded from the database:

|    |       |                                                                                 |
|----|-------|---------------------------------------------------------------------------------|
| 29 | 36610 | Senile cataract, unspecified                                                    |
| 30 | 3638  | Other disorders of choroid                                                      |
| 31 | 3669  | Unspecified cataract                                                            |
| 32 | 8715  | Penetration of eyeball with magnetic foreign body                               |
| 33 | 36282 | Retinal exudates and deposits                                                   |
| 34 | 36289 | Other retinal disorders                                                         |
| 35 | 36504 | Ocular hypertension                                                             |
| 36 | 36563 | Glaucoma associated with vascular disorders                                     |
| 37 | 36614 | Posterior subcapsular polar senile cataract                                     |
| 38 | 36619 | Other and combined forms of senile cataract                                     |
| 39 | 37922 | Crystalline deposits in vitreous                                                |
| 40 | 99653 | Mechanical complication due to ocular lens prosthesis                           |
| 41 | 99679 | Other complications due to other internal prosthetic device, implant, and graft |
| 42 |       |                                                                                 |
| 43 |       |                                                                                 |
| 44 |       |                                                                                 |

#### 6. Other diagnosis to be excluded

For episodes with the principal diagnosis codes below, the episode is excluded from the database:

|    |       |                                                                   |
|----|-------|-------------------------------------------------------------------|
| 45 |       |                                                                   |
| 46 |       |                                                                   |
| 47 |       |                                                                   |
| 48 |       |                                                                   |
| 49 | 8711  | Ocular laceration with prolapse or exposure of intraocular tissue |
| 50 | 36000 | Purulent endophthalmitis, unspecified                             |
| 51 | 36001 | Acute endophthalmitis                                             |
| 52 | 36615 | Cortical senile cataract                                          |
| 53 | 36616 | Senile nuclear sclerosis                                          |
| 54 | 36617 | Total or mature cataract                                          |
| 55 | 36653 | After-cataract, obscuring vision                                  |
| 56 |       |                                                                   |
| 57 |       |                                                                   |
| 58 |       |                                                                   |
| 59 |       |                                                                   |
| 60 |       |                                                                   |



|       |                                                      |
|-------|------------------------------------------------------|
| 37931 | Aphakia                                              |
| 37932 | Subluxation of lens                                  |
| 37934 | Posterior dislocation of lens                        |
| 99859 | Other postoperative infection                        |
| 99882 | Cataract fragments in eye following cataract surgery |
| V5849 | Other specified aftercare following surgery          |

---

## 7. Other diagnosis to be included

For all other episodes that do not meet any of the criteria above, the indication is the principal diagnosis

### ICD 9 CODES

Codes for Diabetic Macular Edema (**DIMAED**):

|       |                        |
|-------|------------------------|
| 36207 | Diabetic macular edema |
|-------|------------------------|

---

Codes for Retinal Vein Occlusion- Central (**RVOCEN**):

|       |                                |
|-------|--------------------------------|
| 36235 | Central retinal vein occlusion |
|-------|--------------------------------|

---

Codes for Retinal Vein Occlusion- Branch (**RVOBRA**):

|       |                                     |
|-------|-------------------------------------|
| 36236 | Venous tributary (branch) occlusion |
|-------|-------------------------------------|

---

Codes for Exudative age-related macular degeneration (**EXARMD**):

|       |                                       |
|-------|---------------------------------------|
| 36252 | Exudative senile macular degeneration |
|-------|---------------------------------------|

---

Codes for Macular puckering (**MACPUC**):

|       |                   |
|-------|-------------------|
| 36256 | Macular puckering |
|-------|-------------------|

---

Codes for Retinal neovascularization or Myopia (**RNVMYO**):

|       |                                        |
|-------|----------------------------------------|
| 36021 | Progressive high (degenerative) myopia |
|-------|----------------------------------------|

|       |                                |
|-------|--------------------------------|
| 36216 | Retinal neovascularization NOS |
|-------|--------------------------------|

|      |        |
|------|--------|
| 3671 | Myopia |
|------|--------|

---

Codes for Other Conditions of the Retina and Choroid (**OCRECH**):

|       |                            |
|-------|----------------------------|
| 36241 | Central serous retinopathy |
|-------|----------------------------|

|       |                   |
|-------|-------------------|
| 36256 | Macular puckering |
|-------|-------------------|

|       |                              |
|-------|------------------------------|
| 36320 | Chorioretinitis, unspecified |
|-------|------------------------------|

|       |                            |
|-------|----------------------------|
| 36343 | Angioid streaks of choroid |
|-------|----------------------------|

---

Codes for Cystoid Macular Degeneration (**CYMADE**):

|       |                              |
|-------|------------------------------|
| 36253 | Cystoid macular degeneration |
|-------|------------------------------|

---

Codes for Unspecified Macular Degeneration (**UNMADE**):

---

36250 Macular degeneration (senile), unspecified

---

Codes for Other Relevant Conditions (**OTRECO**):

---

3612 Serous retinal detachment  
 3619 Unspecified retinal detachment  
 3638 Other disorders of choroid  
 3669 Unspecified cataract  
 8715 Penetration of eyeball with magnetic foreign body  
 25000 Diabetes mellitus without mention of complication, type II or unspecified type, not stated as uncontrolled  
 25050 Diabetes with ophthalmic manifestations, type II or unspecified type, not stated as uncontrolled  
 25051 Diabetes with ophthalmic manifestations, type I [juvenile type], not stated as uncontrolled  
 25052 Diabetes with ophthalmic manifestations, type II or unspecified type, uncontrolled  
 25053 Diabetes with ophthalmic manifestations, type I [juvenile type], uncontrolled  
 36100 Retinal detachment with retinal defect, unspecified  
 36101 Recent retinal detachment, partial, with single defect  
 36102 Recent retinal detachment, partial, with multiple defects  
 36103 Recent retinal detachment, partial, with giant tear  
 36105 Recent retinal detachment, total or subtotal  
 36106 Old retinal detachment, partial  
 36107 Old retinal detachment, total or subtotal  
 36181 Traction detachment of retina  
 36189 Other forms of retinal detachment  
 36210 Background retinopathy, unspecified  
 36212 Exudative retinopathy  
 36215 Retinal telangiectasia  
 36216 Retinal neovascularization NOS  
 36240 Retinal layer separation, unspecified  
 36242 Serous detachment of retinal pigment epithelium  
 36243 Hemorrhagic detachment of retinal pigment epithelium  
 36254 Macular cyst, hole, or pseudohole  
 36257 Drusen (degenerative)  
 36281 Retinal hemorrhage  
 36282 Retinal exudates and deposits  
 36283 Retinal edema  
 36289 Other retinal disorders  
 36442 Rubeosis iridis  
 36474 Adhesions and disruptions of pupillary membranes  
 36504 Ocular hypertension  
 36563 Glaucoma associated with vascular disorders  
 36610 Senile cataract, unspecified  
 36614 Posterior subcapsular polar senile cataract  
 36619 Other and combined forms of senile cataract  
 37060 Corneal neovascularization, unspecified

|       |                                                                                 |
|-------|---------------------------------------------------------------------------------|
| 37922 | Crystalline deposits in vitreous                                                |
| 37923 | Vitreous hemorrhage                                                             |
| 37924 | Other vitreous opacities                                                        |
| 37925 | Vitreous membranes and strands                                                  |
| 37929 | Other disorders of vitreous                                                     |
| 99653 | Mechanical complication due to ocular lens prosthesis                           |
| 99679 | Other complications due to other internal prosthetic device, implant, and graft |

Codes for Other Vascular Occlusions (**OTVAOC**):

|       |                                         |
|-------|-----------------------------------------|
| 36230 | Retinal vascular occlusion, unspecified |
| 36231 | Central retinal artery occlusion        |
| 36232 | Retinal arterial branch occlusion       |

Codes for Atrophic Macular Degeneration (**ATMADE**):

|       |                                          |
|-------|------------------------------------------|
| 36251 | Nonexudative senile macular degeneration |
|-------|------------------------------------------|

## IDENTIFICATION OF INTRAVITREAL ANTI-VEGF TREATMENT EVENTS FOR ICD-10

### 1. Main indications

#### Indication: DIABETIC MACULAR EDEMA (DME)

Numerator: Discharges, with either:

- A principal diagnosis code for Diabetic Macular Edema (**DIMAED**) or
- A principal diagnosis code for Other Relevant Conditions (**OTRECO**) or for Other Type 2 Diabetes Conditions (**ODIACO**) and any secondary diagnosis codes for Diabetic Macular Edema (**DIMAED**) or
- A principal diagnosis code for Retinal Edema (**RETEDE**) and any secondary diagnosis codes for any diabetic condition (ICD10 codes E08-E13).

#### Indication: RETINAL VEIN OCCLUSION (RVO)

#### Indication: RETINAL VEIN OCCLUSION (CENTRAL)

Numerator: Discharges, with either:

- A principal diagnosis code for Retinal Vein Occlusion- Central (**RVOCEN**) or
- A principal diagnosis code for Other Relevant Conditions (**OTRECO**) or Other Diagnosis for Macular Degeneration (**ODMADE**) and any secondary diagnosis codes for Retinal Vein Occlusion- Central (**RVOCEN**).

#### Indication: RETINAL VEIN OCCLUSION (BRANCH)

Numerator: Discharges, with either:

- A principal diagnosis code for Retinal Vein Occlusion- Branch (**RVOBRA**) or
- A principal diagnosis code for Other Relevant Conditions (**OTRECO**) or Other Diagnosis for Macular Degeneration (**ODMADE**) and any secondary diagnosis codes for Retinal Vein Occlusion- Branch (**RVOBRA**).

**Indication: NEOVASCULAR AGE-RELATED MACULAR DEGENERATION (nAMD)**

Numerator: Discharges, with either:

- A principal diagnosis code for Exudative age-related macular degeneration (**EXARMD**) or
- A principal diagnosis code for Other Relevant Conditions (**OTRECO**) or Other Diagnosis for Macular Degeneration (**ODMADE**) or diagnosis code for Macular Puckering (**MACPUC**) and any secondary diagnosis codes for Exudative age-related macular degeneration (**EXARMD**) or
- A principal diagnosis code for Other Relevant Conditions (**OTRECO**) or Other Diagnosis for Macular Degeneration (**ODMADE**) and a previous nAMD case, regardless of age.

**Indication: CHOROIDAL NEOVASCULARIZATION (CNV)**

Numerator: Discharges with either:

- A principal diagnosis code for Retinal neovascularization or Myopia (**RNVMYO**) or
- A principal diagnosis code for Other Relevant Conditions (**OTRECO**) or Other Diagnosis for Macular Degeneration (**ODMADE**) and any secondary diagnosis codes for Retinal neovascularization or Myopia (**RNVMYO**) or
- A principal diagnosis for Macular Puckering (**MACPUC**), except if secondary diagnosis codes for Diabetic Macular Edema (**DIMAED**).

**2. Other indications****Indication: OTHER VASCULAR OCCLUSIONS**

*\*This indication is not included in Retinal Vein Occlusion*

Numerator: Discharges, with either:

- A principal diagnosis code for Other Vascular Occlusions (**OTVAOC**) or
- A principal diagnosis code for Other Relevant (**OTRECO**) and any secondary diagnosis codes for Retinal Vein Occlusion (**OTVAOC**).

**Indication: ATROPHIC MACULAR DEGENERATION**

*\* This indication is not included in Neovascular Age-Related Macular Degeneration*

Numerator: Discharges, with either:

- A principal diagnosis code for Atrophic Macular Degeneration (**ATMADE**) or
- A principal diagnosis code for Other Relevant Conditions (**OTRECO**) and any secondary diagnosis codes for Atrophic Macular Degeneration (**ATMADE**).

**3. Diabetes with Retinopathy**

For episodes with the principal diagnosis codes below, without secondary diagnosis of Diabetic Macular Edema (**DIMAED**), the following criteria applies:

| Principal diagnosis       | Indication                         |
|---------------------------|------------------------------------|
| E11319                    | Unspecified Diabetic Retinopathy   |
| E113591, E113592, E113593 | Proliferative Diabetic Retinopathy |

---

E113291, E113292, E113491, E113551, E113552      Nonproliferative Diabetic Retinopathy

---

#### 4. Other diagnosis to be excluded

For episodes with the principal diagnosis codes below, the episode is excluded from the database:

---

|         |                                                                        |
|---------|------------------------------------------------------------------------|
| G245    | Blepharospasm                                                          |
| H401120 | Primary open-angle glaucoma, left eye, stage unspecified               |
| H5000   | Unspecified esotropia                                                  |
| H5005   | Alternating esotropia                                                  |
| Z48810  | Encounter for surgical aftercare following surgery on the sense organs |

---

#### 5. Other diagnosis to be included

For all other episodes that do not meet any of the criteria above, the indication is the principal diagnosis

#### ICD 10 CODES

Codes for Diabetic Macular Edema (**DIMAED**):

---

|         |                                                                                                                |
|---------|----------------------------------------------------------------------------------------------------------------|
| E10311  | Type 1 diabetes mellitus with unspecified diabetic retinopathy with macular edema                              |
| E103212 | Type 1 diabetes mellitus with mild nonproliferative diabetic retinopathy with macular edema, left eye          |
| E11311  | Type 2 diabetes mellitus with unspecified diabetic retinopathy with macular edema                              |
| E113211 | Type 2 diabetes mellitus with mild nonproliferative diabetic retinopathy with macular edema, right eye         |
| E113212 | Type 2 diabetes mellitus with mild nonproliferative diabetic retinopathy with macular edema, left eye          |
| E113213 | Type 2 diabetes mellitus with mild nonproliferative diabetic retinopathy with macular edema, bilateral         |
| E11331  | Type 2 diabetes mellitus with moderate nonproliferative diabetic retinopathy with macular edema                |
| E113311 | Type 2 diabetes mellitus with moderate nonproliferative diabetic retinopathy with macular edema, right eye     |
| E113312 | Type 2 diabetes mellitus with moderate nonproliferative diabetic retinopathy with macular edema, left eye      |
| E113313 | Type 2 diabetes mellitus with moderate nonproliferative diabetic retinopathy with macular edema, bilateral     |
| E113411 | Type 2 diabetes mellitus with severe nonproliferative diabetic retinopathy with macular edema, right eye       |
| E113412 | Type 2 diabetes mellitus with severe nonproliferative diabetic retinopathy with macular edema, left eye        |
| E113413 | Type 2 diabetes mellitus with severe nonproliferative diabetic retinopathy with macular edema, bilateral       |
| E113419 | Type 2 diabetes mellitus with severe nonproliferative diabetic retinopathy with macular edema, unspecified eye |
| E113511 | Type 2 diabetes mellitus with proliferative diabetic retinopathy with macular edema, right eye                 |
| E113512 | Type 2 diabetes mellitus with proliferative diabetic retinopathy with macular edema, left eye                  |

---

|         |                                                                                                                   |
|---------|-------------------------------------------------------------------------------------------------------------------|
| E113513 | Type 2 diabetes mellitus with proliferative diabetic retinopathy with macular edema, bilateral                    |
| E13311  | Other specified diabetes mellitus with unspecified diabetic retinopathy with macular edema                        |
| E133413 | Other specified diabetes mellitus with severe nonproliferative diabetic retinopathy with macular edema, bilateral |
| E133511 | Other specified diabetes mellitus with proliferative diabetic retinopathy with macular edema, unspecified eye     |

Codes for Other Type 2 Diabetes Conditions (**ODIACO**):

|         |                                                                                    |
|---------|------------------------------------------------------------------------------------|
| E113551 | Type 2 diabetes mellitus with stable proliferative diabetic retinopathy, right eye |
| E113552 | Type 2 diabetes mellitus with stable proliferative diabetic retinopathy, left eye  |
| E1136   | Type 2 diabetes mellitus with diabetic cataract                                    |

Codes for Retinal Edema (**RETEDE**):

|       |               |
|-------|---------------|
| H3581 | Retinal edema |
|-------|---------------|

Codes for Retinal Vein Occlusion- Central (**RVOCEN**):

|         |                                                                            |
|---------|----------------------------------------------------------------------------|
| H348110 | Central retinal vein occlusion, right eye, with macular edema              |
| H348111 | Central retinal vein occlusion, right eye, with retinal neovascularization |
| H348112 | Central retinal vein occlusion, right eye, stable                          |
| H348120 | Central retinal vein occlusion, left eye, with macular edema               |
| H348121 | Central retinal vein occlusion, left eye, with retinal neovascularization  |
| H348122 | Central retinal vein occlusion, left eye, stable                           |
| H348130 | Central retinal vein occlusion, bilateral, with macular edema              |
| H348131 | Central retinal vein occlusion, bilateral, with retinal neovascularization |
| H348132 | Central retinal vein occlusion, bilateral, stable                          |
| H348190 | Central retinal vein occlusion, unspecified eye, with macular edema        |

Codes for Retinal Vein Occlusion- Branch (**RVOBRA**):

|         |                                                                                             |
|---------|---------------------------------------------------------------------------------------------|
| H348310 | Tributary (branch) retinal vein occlusion, right eye, with macular edema                    |
| H348311 | Tributary (branch) retinal vein occlusion, right eye, with retinal neovascularization       |
| H348312 | Tributary (branch) retinal vein occlusion, right eye, stable                                |
| H348320 | Tributary (branch) retinal vein occlusion, left eye, with macular edema                     |
| H348321 | Tributary (branch) retinal vein occlusion, left eye, with retinal neovascularization        |
| H348322 | Tributary (branch) retinal vein occlusion, left eye, stable                                 |
| H348330 | Tributary (branch) retinal vein occlusion, bilateral, with macular edema                    |
| H348331 | Tributary (branch) retinal vein occlusion, bilateral, with retinal neovascularization       |
| H348332 | Tributary (branch) retinal vein occlusion, bilateral, stable                                |
| H348390 | Tributary (branch) retinal vein occlusion, unspecified eye, with macular edema              |
| H348391 | Tributary (branch) retinal vein occlusion, unspecified eye, with retinal neovascularization |
| H348392 | Tributary (branch) retinal vein occlusion, unspecified eye, stable                          |

Codes for Exudative age-related macular degeneration (**EXARMD**):

|    |         |                                                                                                   |
|----|---------|---------------------------------------------------------------------------------------------------|
| 1  | H35321  | Exudative age-related macular degeneration, right eye                                             |
| 2  |         |                                                                                                   |
| 3  | H353210 | Exudative age-related macular degeneration, right eye, stage unspecified                          |
| 4  | H353211 | Exudative age-related macular degeneration, right eye, with active choroidal neovascularization   |
| 5  |         |                                                                                                   |
| 6  | H353212 | Exudative age-related macular degeneration, right eye, with inactive choroidal neovascularization |
| 7  |         |                                                                                                   |
| 8  | H353213 | Exudative age-related macular degeneration, right eye, with inactive scar                         |
| 9  | H353220 | Exudative age-related macular degeneration, left eye, stage unspecified                           |
| 10 | H353221 | Exudative age-related macular degeneration, left eye, with active choroidal neovascularization    |
| 11 |         |                                                                                                   |
| 12 | H353222 | Exudative age-related macular degeneration, left eye, with inactive choroidal neovascularization  |
| 13 |         |                                                                                                   |
| 14 | H353230 | Exudative age-related macular degeneration, bilateral, stage unspecified                          |
| 15 | H353231 | Exudative age-related macular degeneration, bilateral, with active choroidal neovascularization   |
| 16 |         |                                                                                                   |
| 17 | H353232 | Exudative age-related macular degeneration, bilateral, with inactive choroidal neovascularization |
| 18 |         |                                                                                                   |
| 19 | H353290 | Exudative age-related macular degeneration, unspecified, stage unspecified                        |
| 20 | H353291 | Exudative age-related macular degeneration, unspecified, with active choroidal neovascularization |
| 21 |         |                                                                                                   |
| 22 |         |                                                                                                   |
| 23 |         |                                                                                                   |
| 24 |         |                                                                                                   |
| 25 |         |                                                                                                   |

Codes for Macular puckering (**MACPUC**):

|    |        |                                      |
|----|--------|--------------------------------------|
| 26 |        |                                      |
| 27 |        |                                      |
| 28 | H35371 | Puckering of Macula, right eye       |
| 29 | H35372 | Puckering of Macula, left eye        |
| 30 | H35379 | Puckering of Macula, unspecified eye |
| 31 |        |                                      |

Codes for Retinal neovascularization or Myopia (**RNVMYO**):

|    |        |                                                                  |
|----|--------|------------------------------------------------------------------|
| 32 |        |                                                                  |
| 33 |        |                                                                  |
| 34 |        |                                                                  |
| 35 | H35051 | Retinal neovascularization, unspecified, right eye               |
| 36 | H35052 | Retinal neovascularization, unspecified, left eye                |
| 37 | H35053 | Retinal neovascularization, unspecified, bilateral               |
| 38 | H35059 | Retinal neovascularization, unspecified, unspecified eye         |
| 39 | H3533  | Angioid streaks of macula                                        |
| 40 | H4421  | Degenerative myopia, right eye                                   |
| 41 | H4422  | Degenerative myopia, left eye                                    |
| 42 | H442A1 | Degenerative myopia with choroidal neovascularization, right eye |
| 43 | H442A2 | Degenerative myopia with choroidal neovascularization, left eye  |
| 44 |        |                                                                  |
| 45 |        |                                                                  |

Codes for Other Diagnosis for Macular Degeneration (**ODMADE**):

|    |        |                                         |
|----|--------|-----------------------------------------|
| 46 |        |                                         |
| 47 |        |                                         |
| 48 | H3530  | Unspecified macular degeneration        |
| 49 | H35351 | Cystoid macular degeneration, right eye |
| 50 | H35352 | Cystoid macular degeneration, left eye  |
| 51 |        |                                         |

Codes for Other Relevant Conditions (**OTRECO**):

|    |       |                                         |
|----|-------|-----------------------------------------|
| 52 |       |                                         |
| 53 |       |                                         |
| 54 |       |                                         |
| 55 | H2511 | Age-related nuclear cataract, right eye |
| 56 | H2512 | Age-related nuclear cataract, left eye  |
| 57 |       |                                         |



|    |        |                                                              |
|----|--------|--------------------------------------------------------------|
| 1  |        |                                                              |
| 2  |        |                                                              |
| 3  | H25811 | Combined forms of age-related cataract, right eye            |
| 4  | H25812 | Combined forms of age-related cataract, left eye             |
| 5  | H259   | Unspecified age-related cataract                             |
| 6  | H269   | Unspecified cataract                                         |
| 7  | H318   | Other specified disorders of choroid                         |
| 8  | H33001 | Unspecified retinal detachment with retinal break, right eye |
| 9  | H33002 | Unspecified retinal detachment with retinal break, left eye  |
| 10 | H33011 | Retinal detachment with single break, right eye              |
| 11 | H33012 | Retinal detachment with single break, left eye               |
| 12 | H33021 | Retinal detachment with multiple breaks, right eye           |
| 13 | H33022 | Retinal detachment with multiple breaks, left eye            |
| 14 | H33031 | Retinal detachment with giant retinal tear, right eye        |
| 15 | H33032 | Retinal detachment with giant retinal tear, left eye         |
| 16 | H33051 | Total retinal detachment, right eye                          |
| 17 | H33052 | Total retinal detachment, left eye                           |
| 18 | H3321  | Serous retinal detachment, right eye                         |
| 19 | H3322  | Serous retinal detachment, left eye                          |
| 20 | H3500  | Unspecified background retinopathy                           |
| 21 | H35021 | Exudative retinopathy, right eye                             |
| 22 | H35022 | Exudative retinopathy, left eye                              |
| 23 | H35712 | Central serous chorioretinopathy, left eye                   |
| 24 | H3589  | Other specified retinal disorders                            |
| 25 | H4089  | Other specified glaucoma                                     |
| 26 | H409   | Unspecified glaucoma                                         |
| 27 | H4311  | Vitreous hemorrhage, right eye                               |
| 28 | H4312  | Vitreous hemorrhage, left eye                                |
| 29 | H59031 | Cystoid macular edema following cataract surgery, right eye  |
| 30 | H59032 | Cystoid macular edema following cataract surgery, left eye   |

#### Codes for Other Vascular Occlusions (OTVAOC):

|    |       |                                             |
|----|-------|---------------------------------------------|
| 31 | H3411 | Central retinal artery occlusion, right eye |
| 32 | H3412 | Central retinal artery occlusion, left eye  |
| 33 | H349  | Unspecified retinal vascular occlusion      |

#### Codes for Atrophic Macular Degeneration (ATMADE):

|    |         |                                                                                                           |
|----|---------|-----------------------------------------------------------------------------------------------------------|
| 34 | H353110 | Nonexudative age-related macular degeneration, right eye, stage unspecified                               |
| 35 | H353111 | Nonexudative age-related macular degeneration, right eye, early dry stage                                 |
| 36 | H353112 | Nonexudative age-related macular degeneration, right eye, intermediary dry stage                          |
| 37 | H353113 | Nonexudative age-related macular degeneration, right eye, advanced atrophic without subfoveal involvement |
| 38 | H353120 | Nonexudative age-related macular degeneration, left eye, stage unspecified                                |
| 39 | H353121 | Nonexudative age-related macular degeneration, left eye, early dry stage                                  |
| 40 | H353122 | Nonexudative age-related macular degeneration, left eye, intermediary dry stage                           |

---

|   |                                                                                            |
|---|--------------------------------------------------------------------------------------------|
| 1 |                                                                                            |
| 2 |                                                                                            |
| 3 |                                                                                            |
| 4 | H353123 Nonexudative age-related macular degeneration, left eye, advanced atrophic without |
| 5 | subfoveal involvement                                                                      |
| 6 | H353130 Nonexudative age-related macular degeneration, bilateral, stage unspecified        |
| 7 | H353132 Nonexudative age-related macular degeneration, bilateral, intermediary dry stage   |
| 8 | H353190 Nonexudative age-related macular degeneration, unspecified eye, stage unspecified  |

---

9  
10  
11  
12  
13  
14  
15  
16  
17  
18  
19  
20  
21  
22  
23  
24  
25  
26  
27  
28  
29  
30  
31  
32  
33  
34  
35  
36  
37  
38  
39  
40  
41  
42  
43  
44  
45  
46  
47  
48  
49  
50  
51  
52  
53  
54  
55  
56  
57  
58  
59  
60

For peer review only

## Appendix 2

Organizational level of the hospital's ophthalmology departments. Minimal requirements, as defined by the National Network of hospital specialties and referral for Ophthalmology [1]

### Group I:

- Health care: refraction test and consultations (general and diabetes)
- Minimum number of inhabitants in the area of direct influence: 75,000
- Working hours: 8 am to 8 pm
- Minimum equipment required: refraction with slit lamp and keratometer, biometer, ultrasound, campimeter, optical coherence tomography (OCT), angiograph / retinograph, YAG laser, Argon laser or similar, operating microscope, phacoemulsifier
- Minimum of Ophthalmologist specialists: 5

### Group II:

- Health care: all ophthalmic health care with the exception of pediatric oncology, transplantation, glaucoma and cataracts, retinopathy of prematurity, rare diseases
- Daytime medical and surgical urgency: 12h/day; 7 days/week
- Minimum of Ophthalmologist specialists: 12
- Maximum of ophthalmologists: to be defined according to the population to be served;
- Minimum equipment required: in addition to equipment required for hospitals in Group I, vitrectomy device with endolaser, specular microscope and corneal topograph.

### Group III:

- Health care - responsible for all ophthalmic health care, excluding those related to Reference Centers (approved or to be approved)
- Multipurpose emergency: 2 ophthalmologists in physical presence 24h/day; 7 days/week.
- Minimum equipment required: in addition to equipment required for hospitals in Group II, Retcam and portable electrophysiology

**Source:** [1] Serviço Nacional de Saúde. Rede nacional de especialidade hospitalar e de referência de oftalmologia [Internet]. 2016. Available from: [https://www.sns.gov.pt/wp-content/uploads/2016/05/Proposta-RNEHR-Oftalmologia-2016-ACSS-1\\_VFinal.pdf](https://www.sns.gov.pt/wp-content/uploads/2016/05/Proposta-RNEHR-Oftalmologia-2016-ACSS-1_VFinal.pdf)

## Appendix 3

Table S1. Proportion of patients treated with anti-VEGF injections, 2013 and 2018, per region and per diagnosis, Portugal

| Region                      | nAMD   | DME    | CNV    | RVO    |
|-----------------------------|--------|--------|--------|--------|
| Alentejo                    | 4,57%  | 7,40%  | 5,22%  | 7,06%  |
| Algarve                     | 1,61%  | 4,04%  | 1,83%  | 1,20%  |
| Metropolitan area of Lisbon | 25,53% | 21,90% | 24,28% | 25,45% |
| Metropolitan area of Porto  | 27,12% | 24,97% | 26,82% | 26,08% |
| Central region              | 28,56% | 19,04% | 25,26% | 28,57% |
| Northern region             | 12,61% | 22,65% | 16,58% | 11,64% |

Table S2. Spearman's correlation between rate of anti-VEGF treatments and ecological variables (N=278 municipalities).

| Year | Purchasing power | Rate of ophthalmologists | Ophthalmology consultations in all hospitals | Ophthalmology consultations in public hospitals |
|------|------------------|--------------------------|----------------------------------------------|-------------------------------------------------|
| 2013 | 0.048            | 0.085                    | <b>0.131*</b>                                | <b>0.124*</b>                                   |
| 2014 | 0.041            | 0.109                    | 0.102                                        | 0.106                                           |
| 2015 | 0.101            | <b>0.122*</b>            | 0.105                                        | 0.103                                           |
| 2016 | <b>0.206*</b>    | <b>0.144*</b>            | <b>0.156*</b>                                | <b>0.130*</b>                                   |
| 2017 | <b>0.152*</b>    | 0.085                    | 0.083                                        | 0.104                                           |
| 2018 | <b>0.215*</b>    | 0.106                    | 0.097                                        | 0.11                                            |

\**P*-value < 0.05; correlation statistically significant

Table S3. Stepwise linear regression models, rate of anti-VEGF treatments as dependent variable (N=278 municipalities).

| Year | Variable                                     | $\beta$ adjusted coefficient | Significance | Adjusted R <sup>2</sup> |
|------|----------------------------------------------|------------------------------|--------------|-------------------------|
| 2013 | Constant                                     |                              | 0            | 0.026                   |
|      | Ophthalmology consultations in all hospitals | 0.174                        | 0.008        |                         |
| 2014 | Constant                                     |                              | 0.000        | 0.021                   |
|      | Ophthalmology consultations in all hospitals | 0.158                        | 0.016        |                         |
| 2015 | Constant                                     |                              | 0.000        | 0.020                   |
|      | Ophthalmology consultations in all hospitals | 0.156                        | 0.018        |                         |
| 2016 | Constant                                     |                              | 0.000        | 0.039                   |
|      | Purchasing power                             | 0.207                        | 0.002        |                         |
| 2017 | Constant                                     |                              | 0.033        | 0.033                   |
|      | Purchasing power                             | 0.192                        | 0.004        |                         |
| 2018 | Constant                                     |                              | 0.085        | 0.043                   |
|      | Purchasing power                             | 0.217                        | 0.001        |                         |

## STROBE Statement—checklist of items that should be included in reports of observational studies

|                              | Item No                                                                                                                                                                                                                                                                                                   | Recommendation                                                                                                                                                                                                                                                                                                                                                                                                                                                         | Page No |
|------------------------------|-----------------------------------------------------------------------------------------------------------------------------------------------------------------------------------------------------------------------------------------------------------------------------------------------------------|------------------------------------------------------------------------------------------------------------------------------------------------------------------------------------------------------------------------------------------------------------------------------------------------------------------------------------------------------------------------------------------------------------------------------------------------------------------------|---------|
| <b>Title and abstract</b>    | 1                                                                                                                                                                                                                                                                                                         | (a) Indicate the study's design with a commonly used term in the title or the abstract                                                                                                                                                                                                                                                                                                                                                                                 | 2       |
|                              |                                                                                                                                                                                                                                                                                                           | (b) Provide in the abstract an informative and balanced summary of what was done and what was found                                                                                                                                                                                                                                                                                                                                                                    | 2       |
| <b>Introduction</b>          |                                                                                                                                                                                                                                                                                                           |                                                                                                                                                                                                                                                                                                                                                                                                                                                                        |         |
| Background/rationale         | 2                                                                                                                                                                                                                                                                                                         | Explain the scientific background and rationale for the investigation being reported                                                                                                                                                                                                                                                                                                                                                                                   | 3       |
| Objectives                   | 3                                                                                                                                                                                                                                                                                                         | State specific objectives, including any prespecified hypotheses                                                                                                                                                                                                                                                                                                                                                                                                       | 3       |
| <b>Methods</b>               |                                                                                                                                                                                                                                                                                                           |                                                                                                                                                                                                                                                                                                                                                                                                                                                                        |         |
| Study design                 | 4                                                                                                                                                                                                                                                                                                         | Present key elements of study design early in the paper                                                                                                                                                                                                                                                                                                                                                                                                                | 3       |
| Setting                      | 5                                                                                                                                                                                                                                                                                                         | Describe the setting, locations, and relevant dates, including periods of recruitment, exposure, follow-up, and data collection                                                                                                                                                                                                                                                                                                                                        | 3,4     |
| Participants                 | 6                                                                                                                                                                                                                                                                                                         | (a) <i>Cohort study</i> —Give the eligibility criteria, and the sources and methods of selection of participants. Describe methods of follow-up<br><i>Case-control study</i> —Give the eligibility criteria, and the sources and methods of case ascertainment and control selection. Give the rationale for the choice of cases and controls<br><i>Cross-sectional study</i> —Give the eligibility criteria, and the sources and methods of selection of participants | 4       |
|                              |                                                                                                                                                                                                                                                                                                           | (b) <i>Cohort study</i> —For matched studies, give matching criteria and number of exposed and unexposed<br><i>Case-control study</i> —For matched studies, give matching criteria and the number of controls per case                                                                                                                                                                                                                                                 | NA      |
| Variables                    | 7                                                                                                                                                                                                                                                                                                         | Clearly define all outcomes, exposures, predictors, potential confounders, and effect modifiers. Give diagnostic criteria, if applicable                                                                                                                                                                                                                                                                                                                               | 4       |
| Data sources/<br>measurement | 8*                                                                                                                                                                                                                                                                                                        | For each variable of interest, give sources of data and details of methods of assessment (measurement). Describe comparability of assessment methods if there is more than one group                                                                                                                                                                                                                                                                                   | 4,5     |
| Bias                         | 9                                                                                                                                                                                                                                                                                                         | Describe any efforts to address potential sources of bias                                                                                                                                                                                                                                                                                                                                                                                                              | 4       |
| Study size                   | 10                                                                                                                                                                                                                                                                                                        | Explain how the study size was arrived at                                                                                                                                                                                                                                                                                                                                                                                                                              | 3,4     |
| Quantitative variables       | 11                                                                                                                                                                                                                                                                                                        | Explain how quantitative variables were handled in the analyses. If applicable, describe which groupings were chosen and why                                                                                                                                                                                                                                                                                                                                           | 4,5     |
| Statistical methods          | 12                                                                                                                                                                                                                                                                                                        | (a) Describe all statistical methods, including those used to control for confounding                                                                                                                                                                                                                                                                                                                                                                                  | 4,5     |
|                              |                                                                                                                                                                                                                                                                                                           | (b) Describe any methods used to examine subgroups and interactions                                                                                                                                                                                                                                                                                                                                                                                                    | 5       |
|                              | (c) Explain how missing data were addressed                                                                                                                                                                                                                                                               | 4                                                                                                                                                                                                                                                                                                                                                                                                                                                                      |         |
|                              | (d) <i>Cohort study</i> —If applicable, explain how loss to follow-up was addressed<br><i>Case-control study</i> —If applicable, explain how matching of cases and controls was addressed<br><i>Cross-sectional study</i> —If applicable, describe analytical methods taking account of sampling strategy | NA                                                                                                                                                                                                                                                                                                                                                                                                                                                                     |         |
|                              | (e) Describe any sensitivity analyses                                                                                                                                                                                                                                                                     | NA                                                                                                                                                                                                                                                                                                                                                                                                                                                                     |         |

Continued on next page

| <b>Results</b>           |     |                                                                                                                                                                                                              |       |
|--------------------------|-----|--------------------------------------------------------------------------------------------------------------------------------------------------------------------------------------------------------------|-------|
| Participants             | 13* | (a) Report numbers of individuals at each stage of study—eg numbers potentially eligible, examined for eligibility, confirmed eligible, included in the study, completing follow-up, and analysed            | 5     |
|                          |     | (b) Give reasons for non-participation at each stage                                                                                                                                                         | NA    |
|                          |     | (c) Consider use of a flow diagram                                                                                                                                                                           | NA    |
| Descriptive data         | 14* | (a) Give characteristics of study participants (eg demographic, clinical, social) and information on exposures and potential confounders                                                                     | 6,7   |
|                          |     | (b) Indicate number of participants with missing data for each variable of interest                                                                                                                          | NA    |
|                          |     | (c) <i>Cohort study</i> —Summarise follow-up time (eg, average and total amount)                                                                                                                             | NA    |
| Outcome data             | 15* | <i>Cohort study</i> —Report numbers of outcome events or summary measures over time                                                                                                                          | NA    |
|                          |     | <i>Case-control study</i> —Report numbers in each exposure category, or summary measures of exposure                                                                                                         | NA    |
|                          |     | <i>Cross-sectional study</i> —Report numbers of outcome events or summary measures                                                                                                                           | 5,6,7 |
| Main results             | 16  | (a) Give unadjusted estimates and, if applicable, confounder-adjusted estimates and their precision (eg, 95% confidence interval). Make clear which confounders were adjusted for and why they were included | 7,8   |
|                          |     | (b) Report category boundaries when continuous variables were categorized                                                                                                                                    | NA    |
|                          |     | (c) If relevant, consider translating estimates of relative risk into absolute risk for a meaningful time period                                                                                             | NA    |
| Other analyses           | 17  | Report other analyses done—eg analyses of subgroups and interactions, and sensitivity analyses                                                                                                               | NA    |
| <b>Discussion</b>        |     |                                                                                                                                                                                                              |       |
| Key results              | 18  | Summarise key results with reference to study objectives                                                                                                                                                     | 9     |
| Limitations              | 19  | Discuss limitations of the study, taking into account sources of potential bias or imprecision. Discuss both direction and magnitude of any potential bias                                                   | 10    |
| Interpretation           | 20  | Give a cautious overall interpretation of results considering objectives, limitations, multiplicity of analyses, results from similar studies, and other relevant evidence                                   | 9,10  |
| Generalisability         | 21  | Discuss the generalisability (external validity) of the study results                                                                                                                                        | 10,11 |
| <b>Other information</b> |     |                                                                                                                                                                                                              |       |
| Funding                  | 22  | Give the source of funding and the role of the funders for the present study and, if applicable, for the original study on which the present article is based                                                | 11    |

\*Give information separately for cases and controls in case-control studies and, if applicable, for exposed and unexposed groups in cohort and cross-sectional studies.

**Note:** An Explanation and Elaboration article discusses each checklist item and gives methodological background and published examples of transparent reporting. The STROBE checklist is best used in conjunction with this article (freely available on the Web sites of PLoS Medicine at <http://www.plosmedicine.org/>, Annals of Internal Medicine at <http://www.annals.org/>, and Epidemiology at <http://www.epidem.com/>). Information on the STROBE Initiative is available at [www.strobe-statement.org](http://www.strobe-statement.org).
