# Supplementary material for: Trends, geographical variation and factors associated with the use of anti-VEGF intravitreal injections in Portugal (2013–2018): a retrospective analysis of administrative data
Source: PubMed Central journal article supplement — BMJ Open. 2022 Apr 6;12(4):e055478. doi: 10.1136/bmjopen-2021-055478 (PMC8987746; doi:10.1136/bmjopen-2021-055478), 2022-04-06
Supplement: bmjopen-2021-055478supp001.pdf [file bmjopen-2021-055478supp001.pdf]

## Appendix 1

Table 1. ICD Procedure codes used to select episodes related to intravitreal injections with anti-VEGF

| ICD version | Code    | Denomination                                                                |
|-------------|---------|-----------------------------------------------------------------------------|
| ICD-9       | 1474    | Other mechanical vitrectomy                                                 |
| ICD-9       | 1475    | Injection of vitreous substitute                                            |
| ICD-9       | 1479    | Other operations on vitreous                                                |
| ICD-9       | 149     | Other operations on retina, choroid and posterior chamber                   |
| ICD-10      | 3E0C30M | Introduction of monoclonal antibody into eye, percutaneous approach),       |
| ICD-10      | 3E0C3GC | Introduction of other therapeutic substance into eye, percutaneous approach |

### IDENTIFICATION OF INTRAVITREAL ANTI-VEGF TREATMENT EVENTS FOR ICD-9

#### 1. Main indications

##### Indication: DIABETIC MACULAR EDEMA (DME)

Numerator: Discharges, with either:

- A principal diagnosis code for Diabetic Macular Edema (**DIMAED**) or
- A principal diagnosis code for Other Relevant Conditions (**OTRECO**) and any secondary diagnosis codes for Diabetic Macular Edema (**DIMAED**).

##### Indication: RETINAL VEIN OCCLUSION (RVO)

##### Indication: RETINAL VEIN OCCLUSION (CENTRAL)

Numerator: Discharges, with either:

- A principal diagnosis code for Retinal Vein Occlusion- Central (**RVOCEN**) or
- A principal diagnosis code for Other Relevant Conditions (**OTRECO**) and any secondary diagnosis codes for Retinal Vein Occlusion- Central (**RVOCEN**).

##### Indication: RETINAL VEIN OCCLUSION (BRANCH)

Numerator: Discharges, with either:

- A principal diagnosis code for Retinal Vein Occlusion- Branch (**RVOBRA**) or
- A principal diagnosis code for Other Relevant Conditions (**OTRECO**) and any secondary diagnosis codes for Retinal Vein Occlusion- Branch (**RVOBRA**).

##### Indication: NEOVASCULAR AGE-RELATED MACULAR DEGENERATION (nAMD)

Numerator: Discharges, with either:

- A principal diagnosis code for Exudative age-related macular degeneration (**EXARMD**) or
- A principal diagnosis code for Other Relevant Conditions (**OTRECO**) and any secondary diagnosis codes for Exudative age-related macular degeneration (**EXARMD**) or for Macular puckering (**MACPUC**), or

- A principal diagnosis code for Other Conditions of the Retina and Choroid (**OCRECH**) or for Cystoid Macular Degeneration (**CYMADE**) or for Unspecified Macular Degeneration (**UNMADE**) and any secondary diagnosis codes for Exudative age-related macular degeneration (**EXARMD**) or for Macular puckering (**MACPUC**).

**Indication: CHOROIDAL NEOVASCULARIZATION (CNV)**

**Numerator: Discharges with either:**

- A principal diagnosis code for Retinal neovascularization or Myopia (**RNVMYO**) or
- A principal diagnosis code for Other Relevant Conditions (**OTRECO**) and any secondary diagnosis codes for Retinal neovascularization or Myopia (**RNVMYO**) or
- A principal diagnosis for Other Conditions of the Retina and Choroid (**OCRECH**) and any secondary diagnosis, except if admission is for Indication neovascular age-related Macular Degeneration (**AMD**).
- A principal diagnosis code for Other Relevant Conditions (**OTRECO**) and any secondary diagnosis codes for Other Conditions of the Retina and Choroid (**OCRECH**), except if admission is for Indication neovascular age-related Macular Degeneration (**AMD**).

## 2. Other indications

**Indication: OTHER VASCULAR OCCLUSIONS**

*\*This indication is not included in Retinal Vein Occlusion*

Numerator: Discharges, with either:

- A principal diagnosis code for Other Vascular Occlusions (**OTVAOC**) or
- A principal diagnosis code for Other Relevant Conditions (**OTRECO**) and any secondary diagnosis codes for Retinal Vein Occlusion (**OTVAOC**).

**Indication: ATROPHIC MACULAR DEGENERATION**

*\* This indication is not included in Neovascular Age-Related Macular Degeneration*

Numerator: Discharges, with either:

- A principal diagnosis code for Atrophic Macular Degeneration (**ATMADE**) or
- A principal diagnosis code for Other Relevant Conditions (**OTRECO**) and any secondary diagnosis codes for Atrophic Macular Degeneration (**ATMADE**).

**Indication: CYSTOID MACULAR DEGENERATION**

*\* This indication is not included in Neovascular Age-Related Macular Degeneration*

Numerator: Discharges, with either:

- A principal diagnosis code for Cystoid Macular Degeneration (**CYMADE**) and any secondary diagnosis codes, except for Exudative age-related macular degeneration (**EXARMD**) or for Macular puckering (**MACPUC**) or for Atrophic Macular Degeneration (**ATMADE**); and patient aged less than 50 years old.

**Indication: UNSPECIFIED MACULAR DEGENERATION**

\* This indication is not included in Neovascular Age-Related Macular Degeneration

Numerator: Discharges, with either:

- A principal diagnosis code for Unspecified Macular Degeneration (**UNMADE**) and any secondary diagnosis codes, except for Exudative age-related macular degeneration (**EXARMD**) or for Macular puckering (**MACPUC**) or for Atrophic Macular Degeneration (**ATMADE**), or
- A principal diagnosis code for Cystoid Macular Degeneration (**CYMADE**) and any secondary diagnosis codes, except for Exudative age-related macular degeneration (**EXARMD**) or for Macular puckering (**MACPUC**) or for Atrophic Macular Degeneration (**ATMADE**); and patient aged 50 years old or more.

### 3. Diabetes with ophthalmic manifestations not stated as uncontrolled

For episodes with principal diagnosis codes 25050 and 25052, not classified as any indication above, the following criteria applies:

| <b>If any secondary diagnosis code:</b> | <b>Indication</b>                     |
|-----------------------------------------|---------------------------------------|
| 36201                                   | Unspecified Diabetic Retinopathy      |
| 36202                                   | Proliferative Diabetic Retinopathy    |
| 36203 to 36206                          | Nonproliferative Diabetic Retinopathy |
| Other diagnosis code                    | The secondary diagnosis code          |
| No diagnosis code                       | 25050 or 25052                        |

### 4. Other relevant diagnosis to be included

For episodes with the principal diagnosis codes below, not classified as any indication above, the indication is the principal diagnosis itself:

|       |                                                                                                            |
|-------|------------------------------------------------------------------------------------------------------------|
| 3612  | Serous retinal detachment                                                                                  |
| 3619  | Unspecified retinal detachment                                                                             |
| 25000 | Diabetes mellitus without mention of complication, type II or unspecified type, not stated as uncontrolled |
| 25052 | Diabetes with ophthalmic manifestations, type II or unspecified type, uncontrolled                         |
| 25053 | Diabetes with ophthalmic manifestations, type I [juvenile type], uncontrolled                              |
| 36100 | Retinal detachment with retinal defect, unspecified                                                        |
| 36101 | Recent retinal detachment, partial, with single defect                                                     |
| 36102 | Recent retinal detachment, partial, with multiple defects                                                  |
| 36103 | Recent retinal detachment, partial, with giant tear                                                        |
| 36105 | Recent retinal detachment, total or subtotal                                                               |
| 36106 | Old retinal detachment, partial                                                                            |
| 36107 | Old retinal detachment, total or subtotal                                                                  |
| 36181 | Traction detachment of retina                                                                              |
| 36189 | Other forms of retinal detachment                                                                          |
| 36210 | Background retinopathy, unspecified                                                                        |
| 36212 | Exudative retinopathy                                                                                      |
| 36215 | Retinal telangiectasia                                                                                     |

---

|       |                                                      |
|-------|------------------------------------------------------|
| 36216 | Retinal neovascularization NOS                       |
| 36240 | Retinal layer separation, unspecified                |
| 36242 | Serous detachment of retinal pigment epithelium      |
| 36243 | Hemorrhagic detachment of retinal pigment epithelium |
| 36254 | Macular cyst, hole, or pseudohole                    |
| 36257 | Drusen (degenerative)                                |
| 36281 | Retinal hemorrhage                                   |
| 36283 | Retinal edema                                        |
| 36442 | Rubeosis iridis                                      |
| 36474 | Adhesions and disruptions of pupillary membranes     |
| 37060 | Corneal neovascularization, unspecified              |
| 37923 | Vitreous hemorrhage                                  |
| 37924 | Other vitreous opacities                             |
| 37925 | Vitreous membranes and strands                       |
| 37929 | Other disorders of vitreous                          |

---

### 5. Other relevant diagnosis to be excluded

For episodes with the principal diagnosis codes below, not classified as any indication above, the episode is excluded from the database:

---

|       |                                                                                 |
|-------|---------------------------------------------------------------------------------|
| 36610 | Senile cataract, unspecified                                                    |
| 3638  | Other disorders of choroid                                                      |
| 3669  | Unspecified cataract                                                            |
| 8715  | Penetration of eyeball with magnetic foreign body                               |
| 36282 | Retinal exudates and deposits                                                   |
| 36289 | Other retinal disorders                                                         |
| 36504 | Ocular hypertension                                                             |
| 36563 | Glaucoma associated with vascular disorders                                     |
| 36614 | Posterior subcapsular polar senile cataract                                     |
| 36619 | Other and combined forms of senile cataract                                     |
| 37922 | Crystalline deposits in vitreous                                                |
| 99653 | Mechanical complication due to ocular lens prosthesis                           |
| 99679 | Other complications due to other internal prosthetic device, implant, and graft |

---

### 6. Other diagnosis to be excluded

For episodes with the principal diagnosis codes below, the episode is excluded from the database:

---

|       |                                                                   |
|-------|-------------------------------------------------------------------|
| 8711  | Ocular laceration with prolapse or exposure of intraocular tissue |
| 36000 | Purulent endophthalmitis, unspecified                             |
| 36001 | Acute endophthalmitis                                             |
| 36615 | Cortical senile cataract                                          |
| 36616 | Senile nuclear sclerosis                                          |
| 36617 | Total or mature cataract                                          |
| 36653 | After-cataract, obscuring vision                                  |

---

|       |                                                      |
|-------|------------------------------------------------------|
| 37931 | Aphakia                                              |
| 37932 | Subluxation of lens                                  |
| 37934 | Posterior dislocation of lens                        |
| 99859 | Other postoperative infection                        |
| 99882 | Cataract fragments in eye following cataract surgery |
| V5849 | Other specified aftercare following surgery          |

---

### 7. Other diagnosis to be included

For all other episodes that do not meet any of the criteria above, the indication is the principal diagnosis

#### ICD 9 CODES

Codes for Diabetic Macular Edema (**DIMAED**):

---

|       |                        |
|-------|------------------------|
| 36207 | Diabetic macular edema |
|-------|------------------------|

---

Codes for Retinal Vein Occlusion- Central (**RVOCEN**):

---

|       |                                |
|-------|--------------------------------|
| 36235 | Central retinal vein occlusion |
|-------|--------------------------------|

---

Codes for Retinal Vein Occlusion- Branch (**RVOBRA**):

---

|       |                                     |
|-------|-------------------------------------|
| 36236 | Venous tributary (branch) occlusion |
|-------|-------------------------------------|

---

Codes for Exudative age-related macular degeneration (**EXARMD**):

---

|       |                                       |
|-------|---------------------------------------|
| 36252 | Exudative senile macular degeneration |
|-------|---------------------------------------|

---

Codes for Macular puckering (**MACPUC**):

---

|       |                   |
|-------|-------------------|
| 36256 | Macular puckering |
|-------|-------------------|

---

Codes for Retinal neovascularization or Myopia (**RNVMYO**):

---

|       |                                        |
|-------|----------------------------------------|
| 36021 | Progressive high (degenerative) myopia |
| 36216 | Retinal neovascularization NOS         |
| 3671  | Myopia                                 |

---

Codes for Other Conditions of the Retina and Choroid (**OCRECH**):

---

|       |                              |
|-------|------------------------------|
| 36241 | Central serous retinopathy   |
| 36256 | Macular puckering            |
| 36320 | Chorioretinitis, unspecified |
| 36343 | Angioid streaks of choroid   |

---

Codes for Cystoid Macular Degeneration (**CYMADE**):

---

|       |                              |
|-------|------------------------------|
| 36253 | Cystoid macular degeneration |
|-------|------------------------------|

---

Codes for Unspecified Macular Degeneration (**UNMADE**):

---

**36250 Macular degeneration (senile), unspecified**

---

**Codes for Other Relevant Conditions (OTRECO):**

---

|       |                                                                                                            |
|-------|------------------------------------------------------------------------------------------------------------|
| 3612  | Serous retinal detachment                                                                                  |
| 3619  | Unspecified retinal detachment                                                                             |
| 3638  | Other disorders of choroid                                                                                 |
| 3669  | Unspecified cataract                                                                                       |
| 8715  | Penetration of eyeball with magnetic foreign body                                                          |
| 25000 | Diabetes mellitus without mention of complication, type II or unspecified type, not stated as uncontrolled |
| 25050 | Diabetes with ophthalmic manifestations, type II or unspecified type, not stated as uncontrolled           |
| 25051 | Diabetes with ophthalmic manifestations, type I [juvenile type], not stated as uncontrolled                |
| 25052 | Diabetes with ophthalmic manifestations, type II or unspecified type, uncontrolled                         |
| 25053 | Diabetes with ophthalmic manifestations, type I [juvenile type], uncontrolled                              |
| 36100 | Retinal detachment with retinal defect, unspecified                                                        |
| 36101 | Recent retinal detachment, partial, with single defect                                                     |
| 36102 | Recent retinal detachment, partial, with multiple defects                                                  |
| 36103 | Recent retinal detachment, partial, with giant tear                                                        |
| 36105 | Recent retinal detachment, total or subtotal                                                               |
| 36106 | Old retinal detachment, partial                                                                            |
| 36107 | Old retinal detachment, total or subtotal                                                                  |
| 36181 | Traction detachment of retina                                                                              |
| 36189 | Other forms of retinal detachment                                                                          |
| 36210 | Background retinopathy, unspecified                                                                        |
| 36212 | Exudative retinopathy                                                                                      |
| 36215 | Retinal telangiectasia                                                                                     |
| 36216 | Retinal neovascularization NOS                                                                             |
| 36240 | Retinal layer separation, unspecified                                                                      |
| 36242 | Serous detachment of retinal pigment epithelium                                                            |
| 36243 | Hemorrhagic detachment of retinal pigment epithelium                                                       |
| 36254 | Macular cyst, hole, or pseudohole                                                                          |
| 36257 | Drusen (degenerative)                                                                                      |
| 36281 | Retinal hemorrhage                                                                                         |
| 36282 | Retinal exudates and deposits                                                                              |
| 36283 | Retinal edema                                                                                              |
| 36289 | Other retinal disorders                                                                                    |
| 36442 | Rubeosis iridis                                                                                            |
| 36474 | Adhesions and disruptions of pupillary membranes                                                           |
| 36504 | Ocular hypertension                                                                                        |
| 36563 | Glaucoma associated with vascular disorders                                                                |
| 36610 | Senile cataract, unspecified                                                                               |
| 36614 | Posterior subcapsular polar senile cataract                                                                |
| 36619 | Other and combined forms of senile cataract                                                                |
| 37060 | Corneal neovascularization, unspecified                                                                    |

|       |                                                                                 |
|-------|---------------------------------------------------------------------------------|
| 37922 | Crystalline deposits in vitreous                                                |
| 37923 | Vitreous hemorrhage                                                             |
| 37924 | Other vitreous opacities                                                        |
| 37925 | Vitreous membranes and strands                                                  |
| 37929 | Other disorders of vitreous                                                     |
| 99653 | Mechanical complication due to ocular lens prosthesis                           |
| 99679 | Other complications due to other internal prosthetic device, implant, and graft |

---

Codes for Other Vascular Occlusions (**OTVAOC**):

|       |                                         |
|-------|-----------------------------------------|
| 36230 | Retinal vascular occlusion, unspecified |
| 36231 | Central retinal artery occlusion        |
| 36232 | Retinal arterial branch occlusion       |

---

Codes for Atrophic Macular Degeneration (**ATMADE**):

|       |                                          |
|-------|------------------------------------------|
| 36251 | Nonexudative senile macular degeneration |
|-------|------------------------------------------|

---

## IDENTIFICATION OF INTRAVITREAL ANTI-VEGF TREATMENT EVENTS FOR ICD-10

### 1. Main indications

#### Indication: DIABETIC MACULAR EDEMA (DME)

Numerator: Discharges, with either:

- A principal diagnosis code for Diabetic Macular Edema (**DIMAED**) or
- A principal diagnosis code for Other Relevant Conditions (**OTRECO**) or for Other Type 2 Diabetes Conditions (**ODIACO**) and any secondary diagnosis codes for Diabetic Macular Edema (**DIMAED**) or
- A principal diagnosis code for Retinal Edema (**RETEDE**) and any secondary diagnosis codes for any diabetic condition (ICD10 codes E08-E13).

#### Indication: RETINAL VEIN OCCLUSION (RVO)

#### Indication: RETINAL VEIN OCCLUSION (CENTRAL)

Numerator: Discharges, with either:

- A principal diagnosis code for Retinal Vein Occlusion- Central (**RVOCEN**) or
- A principal diagnosis code for Other Relevant Conditions (**OTRECO**) or Other Diagnosis for Macular Degeneration (**ODMADE**) and any secondary diagnosis codes for Retinal Vein Occlusion- Central (**RVOCEN**).

#### Indication: RETINAL VEIN OCCLUSION (BRANCH)

Numerator: Discharges, with either:

- A principal diagnosis code for Retinal Vein Occlusion- Branch (**RVOBRA**) or
- A principal diagnosis code for Other Relevant Conditions (**OTRECO**) or Other Diagnosis for Macular Degeneration (**ODMADE**) and any secondary diagnosis codes for Retinal Vein Occlusion- Branch (**RVOBRA**).

**Indication: NEOVASCULAR AGE-RELATED MACULAR DEGENERATION (nAMD)**

Numerator: Discharges, with either:

- A principal diagnosis code for Exudative age-related macular degeneration (**EXARMD**) or
- A principal diagnosis code for Other Relevant Conditions (**OTRECO**) or Other Diagnosis for Macular Degeneration (**ODMADE**) or diagnosis code for Macular Puckering (**MACPUC**) and any secondary diagnosis codes for Exudative age-related macular degeneration (**EXARMD**) or
- A principal diagnosis code for Other Relevant Conditions (**OTRECO**) or Other Diagnosis for Macular Degeneration (**ODMADE**) and a previous nAMD case, regardless of age.

**Indication: CHOROIDAL NEOVASCULARIZATION (CNV)**

Numerator: Discharges with either:

- A principal diagnosis code for Retinal neovascularization or Myopia (**RNVMYO**) or
- A principal diagnosis code for Other Relevant Conditions (**OTRECO**) or Other Diagnosis for Macular Degeneration (**ODMADE**) and any secondary diagnosis codes for Retinal neovascularization or Myopia (**RNVMYO**) or
- A principal diagnosis for Macular Puckering (**MACPUC**), except if secondary diagnosis codes for Diabetic Macular Edema (**DIMAED**).

**2. Other indications****Indication: OTHER VASCULAR OCCLUSIONS**

*\*This indication is not included in Retinal Vein Occlusion*

Numerator: Discharges, with either:

- A principal diagnosis code for Other Vascular Occlusions (**OTVAOC**) or
- A principal diagnosis code for Other Relevant (**OTRECO**) and any secondary diagnosis codes for Retinal Vein Occlusion (**OTVAOC**).

**Indication: ATROPHIC MACULAR DEGENERATION**

*\* This indication is not included in Neovascular Age-Related Macular Degeneration*

Numerator: Discharges, with either:

- A principal diagnosis code for Atrophic Macular Degeneration (**ATMADE**) or
- A principal diagnosis code for Other Relevant Conditions (**OTRECO**) and any secondary diagnosis codes for Atrophic Macular Degeneration (**ATMADE**).

**3. Diabetes with Retinopathy**

For episodes with the principal diagnosis codes below, without secondary diagnosis of Diabetic Macular Edema (**DIMAED**), the following criteria applies:

| Principal diagnosis       | Indication                         |
|---------------------------|------------------------------------|
| E11319                    | Unspecified Diabetic Retinopathy   |
| E113591, E113592, E113593 | Proliferative Diabetic Retinopathy |

---

E113291, E113292, E113491, E113551, E113552      Nonproliferative Diabetic Retinopathy

---

#### 4. Other diagnosis to be excluded

For episodes with the principal diagnosis codes below, the episode is excluded from the database:

---

|         |                                                                        |
|---------|------------------------------------------------------------------------|
| G245    | Blepharospasm                                                          |
| H401120 | Primary open-angle glaucoma, left eye, stage unspecified               |
| H5000   | Unspecified esotropia                                                  |
| H5005   | Alternating esotropia                                                  |
| Z48810  | Encounter for surgical aftercare following surgery on the sense organs |

---

#### 5. Other diagnosis to be included

For all other episodes that do not meet any of the criteria above, the indication is the principal diagnosis

#### ICD 10 CODES

Codes for Diabetic Macular Edema (**DIMAED**):

---

|         |                                                                                                                |
|---------|----------------------------------------------------------------------------------------------------------------|
| E10311  | Type 1 diabetes mellitus with unspecified diabetic retinopathy with macular edema                              |
| E103212 | Type 1 diabetes mellitus with mild nonproliferative diabetic retinopathy with macular edema, left eye          |
| E11311  | Type 2 diabetes mellitus with unspecified diabetic retinopathy with macular edema                              |
| E113211 | Type 2 diabetes mellitus with mild nonproliferative diabetic retinopathy with macular edema, right eye         |
| E113212 | Type 2 diabetes mellitus with mild nonproliferative diabetic retinopathy with macular edema, left eye          |
| E113213 | Type 2 diabetes mellitus with mild nonproliferative diabetic retinopathy with macular edema, bilateral         |
| E11331  | Type 2 diabetes mellitus with moderate nonproliferative diabetic retinopathy with macular edema                |
| E113311 | Type 2 diabetes mellitus with moderate nonproliferative diabetic retinopathy with macular edema, right eye     |
| E113312 | Type 2 diabetes mellitus with moderate nonproliferative diabetic retinopathy with macular edema, left eye      |
| E113313 | Type 2 diabetes mellitus with moderate nonproliferative diabetic retinopathy with macular edema, bilateral     |
| E113411 | Type 2 diabetes mellitus with severe nonproliferative diabetic retinopathy with macular edema, right eye       |
| E113412 | Type 2 diabetes mellitus with severe nonproliferative diabetic retinopathy with macular edema, left eye        |
| E113413 | Type 2 diabetes mellitus with severe nonproliferative diabetic retinopathy with macular edema, bilateral       |
| E113419 | Type 2 diabetes mellitus with severe nonproliferative diabetic retinopathy with macular edema, unspecified eye |
| E113511 | Type 2 diabetes mellitus with proliferative diabetic retinopathy with macular edema, right eye                 |
| E113512 | Type 2 diabetes mellitus with proliferative diabetic retinopathy with macular edema, left eye                  |

---

---

|         |                                                                                                                   |
|---------|-------------------------------------------------------------------------------------------------------------------|
| E113513 | Type 2 diabetes mellitus with proliferative diabetic retinopathy with macular edema, bilateral                    |
| E13311  | Other specified diabetes mellitus with unspecified diabetic retinopathy with macular edema                        |
| E133413 | Other specified diabetes mellitus with severe nonproliferative diabetic retinopathy with macular edema, bilateral |
| E133511 | Other specified diabetes mellitus with proliferative diabetic retinopathy with macular edema, unspecified eye     |

---

Codes for Other Type 2 Diabetes Conditions (**ODIACO**):

---

|         |                                                                                    |
|---------|------------------------------------------------------------------------------------|
| E113551 | Type 2 diabetes mellitus with stable proliferative diabetic retinopathy, right eye |
| E113552 | Type 2 diabetes mellitus with stable proliferative diabetic retinopathy, left eye  |
| E1136   | Type 2 diabetes mellitus with diabetic cataract                                    |

---

Codes for Retinal Edema (**RETEDE**):

---

|       |               |
|-------|---------------|
| H3581 | Retinal edema |
|-------|---------------|

---

Codes for Retinal Vein Occlusion- Central (**RVOCEN**):

---

|         |                                                                            |
|---------|----------------------------------------------------------------------------|
| H348110 | Central retinal vein occlusion, right eye, with macular edema              |
| H348111 | Central retinal vein occlusion, right eye, with retinal neovascularization |
| H348112 | Central retinal vein occlusion, right eye, stable                          |
| H348120 | Central retinal vein occlusion, left eye, with macular edema               |
| H348121 | Central retinal vein occlusion, left eye, with retinal neovascularization  |
| H348122 | Central retinal vein occlusion, left eye, stable                           |
| H348130 | Central retinal vein occlusion, bilateral, with macular edema              |
| H348131 | Central retinal vein occlusion, bilateral, with retinal neovascularization |
| H348132 | Central retinal vein occlusion, bilateral, stable                          |
| H348190 | Central retinal vein occlusion, unspecified eye, with macular edema        |

---

Codes for Retinal Vein Occlusion- Branch (**RVOBRA**):

---

|         |                                                                                             |
|---------|---------------------------------------------------------------------------------------------|
| H348310 | Tributary (branch) retinal vein occlusion, right eye, with macular edema                    |
| H348311 | Tributary (branch) retinal vein occlusion, right eye, with retinal neovascularization       |
| H348312 | Tributary (branch) retinal vein occlusion, right eye, stable                                |
| H348320 | Tributary (branch) retinal vein occlusion, left eye, with macular edema                     |
| H348321 | Tributary (branch) retinal vein occlusion, left eye, with retinal neovascularization        |
| H348322 | Tributary (branch) retinal vein occlusion, left eye, stable                                 |
| H348330 | Tributary (branch) retinal vein occlusion, bilateral, with macular edema                    |
| H348331 | Tributary (branch) retinal vein occlusion, bilateral, with retinal neovascularization       |
| H348332 | Tributary (branch) retinal vein occlusion, bilateral, stable                                |
| H348390 | Tributary (branch) retinal vein occlusion, unspecified eye, with macular edema              |
| H348391 | Tributary (branch) retinal vein occlusion, unspecified eye, with retinal neovascularization |
| H348392 | Tributary (branch) retinal vein occlusion, unspecified eye, stable                          |

---

Codes for Exudative age-related macular degeneration (**EXARMD**):

---

|         |                                                                                                   |
|---------|---------------------------------------------------------------------------------------------------|
| H35321  | Exudative age-related macular degeneration, right eye                                             |
| H353210 | Exudative age-related macular degeneration, right eye, stage unspecified                          |
| H353211 | Exudative age-related macular degeneration, right eye, with active choroidal neovascularization   |
| H353212 | Exudative age-related macular degeneration, right eye, with inactive choroidal neovascularization |
| H353213 | Exudative age-related macular degeneration, right eye, with inactive scar                         |
| H353220 | Exudative age-related macular degeneration, left eye, stage unspecified                           |
| H353221 | Exudative age-related macular degeneration, left eye, with active choroidal neovascularization    |
| H353222 | Exudative age-related macular degeneration, left eye, with inactive choroidal neovascularization  |
| H353230 | Exudative age-related macular degeneration, bilateral, stage unspecified                          |
| H353231 | Exudative age-related macular degeneration, bilateral, with active choroidal neovascularization   |
| H353232 | Exudative age-related macular degeneration, bilateral, with inactive choroidal neovascularization |
| H353290 | Exudative age-related macular degeneration, unspecified, stage unspecified                        |
| H353291 | Exudative age-related macular degeneration, unspecified, with active choroidal neovascularization |

---

Codes for Macular puckering (**MACPUC**):

---

|        |                                      |
|--------|--------------------------------------|
| H35371 | Puckering of Macula, right eye       |
| H35372 | Puckering of Macula, left eye        |
| H35379 | Puckering of Macula, unspecified eye |

---

Codes for Retinal neovascularization or Myopia (**RNVMYO**):

---

|        |                                                                  |
|--------|------------------------------------------------------------------|
| H35051 | Retinal neovascularization, unspecified, right eye               |
| H35052 | Retinal neovascularization, unspecified, left eye                |
| H35053 | Retinal neovascularization, unspecified, bilateral               |
| H35059 | Retinal neovascularization, unspecified, unspecified eye         |
| H3533  | Angioid streaks of macula                                        |
| H4421  | Degenerative myopia, right eye                                   |
| H4422  | Degenerative myopia, left eye                                    |
| H442A1 | Degenerative myopia with choroidal neovascularization, right eye |
| H442A2 | Degenerative myopia with choroidal neovascularization, left eye  |

---

Codes for Other Diagnosis for Macular Degeneration (**ODMADE**):

---

|        |                                         |
|--------|-----------------------------------------|
| H3530  | Unspecified macular degeneration        |
| H35351 | Cystoid macular degeneration, right eye |
| H35352 | Cystoid macular degeneration, left eye  |

---

Codes for Other Relevant Conditions (**OTRECO**):

---

|       |                                         |
|-------|-----------------------------------------|
| H2511 | Age-related nuclear cataract, right eye |
| H2512 | Age-related nuclear cataract, left eye  |

---

---

|        |                                                              |
|--------|--------------------------------------------------------------|
| H25811 | Combined forms of age-related cataract, right eye            |
| H25812 | Combined forms of age-related cataract, left eye             |
| H259   | Unspecified age-related cataract                             |
| H269   | Unspecified cataract                                         |
| H318   | Other specified disorders of choroid                         |
| H33001 | Unspecified retinal detachment with retinal break, right eye |
| H33002 | Unspecified retinal detachment with retinal break, left eye  |
| H33011 | Retinal detachment with single break, right eye              |
| H33012 | Retinal detachment with single break, left eye               |
| H33021 | Retinal detachment with multiple breaks, right eye           |
| H33022 | Retinal detachment with multiple breaks, left eye            |
| H33031 | Retinal detachment with giant retinal tear, right eye        |
| H33032 | Retinal detachment with giant retinal tear, left eye         |
| H33051 | Total retinal detachment, right eye                          |
| H33052 | Total retinal detachment, left eye                           |
| H3321  | Serous retinal detachment, right eye                         |
| H3322  | Serous retinal detachment, left eye                          |
| H3500  | Unspecified background retinopathy                           |
| H35021 | Exudative retinopathy, right eye                             |
| H35022 | Exudative retinopathy, left eye                              |
| H35712 | Central serous chorioretinopathy, left eye                   |
| H3589  | Other specified retinal disorders                            |
| H4089  | Other specified glaucoma                                     |
| H409   | Unspecified glaucoma                                         |
| H4311  | Vitreous hemorrhage, right eye                               |
| H4312  | Vitreous hemorrhage, left eye                                |
| H59031 | Cystoid macular edema following cataract surgery, right eye  |
| H59032 | Cystoid macular edema following cataract surgery, left eye   |

---

Codes for Other Vascular Occlusions (**OTVAOC**):

---

|       |                                             |
|-------|---------------------------------------------|
| H3411 | Central retinal artery occlusion, right eye |
| H3412 | Central retinal artery occlusion, left eye  |
| H349  | Unspecified retinal vascular occlusion      |

---

Codes for Atrophic Macular Degeneration (**ATMADE**):

---

|         |                                                                                                           |
|---------|-----------------------------------------------------------------------------------------------------------|
| H353110 | Nonexudative age-related macular degeneration, right eye, stage unspecified                               |
| H353111 | Nonexudative age-related macular degeneration, right eye, early dry stage                                 |
| H353112 | Nonexudative age-related macular degeneration, right eye, intermediary dry stage                          |
| H353113 | Nonexudative age-related macular degeneration, right eye, advanced atrophic without subfoveal involvement |
| H353120 | Nonexudative age-related macular degeneration, left eye, stage unspecified                                |
| H353121 | Nonexudative age-related macular degeneration, left eye, early dry stage                                  |
| H353122 | Nonexudative age-related macular degeneration, left eye, intermediary dry stage                           |

---

---

|         |                                                                                                          |
|---------|----------------------------------------------------------------------------------------------------------|
| H353123 | Nonexudative age-related macular degeneration, left eye, advanced atrophic without subfoveal involvement |
| H353130 | Nonexudative age-related macular degeneration, bilateral, stage unspecified                              |
| H353132 | Nonexudative age-related macular degeneration, bilateral, intermediary dry stage                         |
| H353190 | Nonexudative age-related macular degeneration, unspecified eye, stage unspecified                        |

---

## Appendix 2

Organizational level of the hospital's ophthalmology departments. Minimal requirements, as defined by the National Network of hospital specialties and referral for Ophthalmology [1]

### Group I:

- Health care: refraction test and consultations (general and diabetes)
- Minimum number of inhabitants in the area of direct influence: 75,000
- Working hours: 8 am to 8 pm
- Minimum equipment required: refraction with slit lamp and keratometer, biometer, ultrasound, campimeter, optical coherence tomography (OCT), angiograph / retinograph, YAG laser, Argon laser or similar, operating microscope, phacoemulsifier
- Minimum of Ophthalmologist specialists: 5

### Group II:

- Health care: all ophthalmic health care with the exception of pediatric oncology, transplantation, glaucoma and cataracts, retinopathy of prematurity, rare diseases
- Daytime medical and surgical urgency: 12h/day; 7 days/week
- Minimum of Ophthalmologist specialists: 12
- Maximum of ophthalmologists: to be defined according to the population to be served;
- Minimum equipment required: in addition to equipment required for hospitals in Group I, vitrectomy device with endolaser, specular microscope and corneal topograph.

### Group III:

- Health care - responsible for all ophthalmic health care, excluding those related to Reference Centers (approved or to be approved)
- Multipurpose emergency: 2 ophthalmologists in physical presence 24h/day; 7 days/week.
- Minimum equipment required: in addition to equipment required for hospitals in Group II, Retcam and portable electrophysiology

**Source:** [1] Serviço Nacional de Saúde. Rede nacional de especialidade hospitalar e de referência de oftalmologia [Internet]. 2016. Available from: [https://www.sns.gov.pt/wp-content/uploads/2016/05/Proposta-RNEHR-Oftalmologia-2016-ACSS-1\\_VFinal.pdf](https://www.sns.gov.pt/wp-content/uploads/2016/05/Proposta-RNEHR-Oftalmologia-2016-ACSS-1_VFinal.pdf)

### Appendix 3

Table S1. Proportion of patients treated with anti-VEGF injections, 2013 and 2018, per region and per diagnosis, Portugal

| Region                      | nAMD   | DME    | CNV    | RVO    |
|-----------------------------|--------|--------|--------|--------|
| Alentejo                    | 4,57%  | 7,40%  | 5,22%  | 7,06%  |
| Algarve                     | 1,61%  | 4,04%  | 1,83%  | 1,20%  |
| Metropolitan area of Lisbon | 25,53% | 21,90% | 24,28% | 25,45% |
| Metropolitan area of Porto  | 27,12% | 24,97% | 26,82% | 26,08% |
| Central region              | 28,56% | 19,04% | 25,26% | 28,57% |
| Northern region             | 12,61% | 22,65% | 16,58% | 11,64% |

Table S2. Spearman's correlation between rate of anti-VEGF treatments and ecological variables (N=278 municipalities).

| Year | Purchasing power | Rate of ophthalmologists | Ophthalmology consultations in all hospitals | Ophthalmology consultations in public hospitals |
|------|------------------|--------------------------|----------------------------------------------|-------------------------------------------------|
| 2013 | 0.048            | 0.085                    | <b>0.131*</b>                                | <b>0.124*</b>                                   |
| 2014 | 0.041            | 0.109                    | 0.102                                        | 0.106                                           |
| 2015 | 0.101            | <b>0.122*</b>            | 0.105                                        | 0.103                                           |
| 2016 | <b>0.206*</b>    | <b>0.144*</b>            | <b>0.156*</b>                                | <b>0.130*</b>                                   |
| 2017 | <b>0.152*</b>    | 0.085                    | 0.083                                        | 0.104                                           |
| 2018 | <b>0.215*</b>    | 0.106                    | 0.097                                        | 0.11                                            |

\*P-value < 0.05; correlation statistically significant

Table S3. Stepwise linear regression models, rate of anti-VEGF treatments as dependent variable (N=278 municipalities).

| Year | Variable                                     | $\beta$ adjusted coefficient | Significance | Adjusted R <sup>2</sup> |
|------|----------------------------------------------|------------------------------|--------------|-------------------------|
| 2013 | Constant                                     |                              | 0            | 0.026                   |
|      | Ophthalmology consultations in all hospitals | 0.174                        | 0.008        |                         |
| 2014 | Constant                                     |                              | 0.000        | 0.021                   |
|      | Ophthalmology consultations in all hospitals | 0.158                        | 0.016        |                         |
| 2015 | Constant                                     |                              | 0.000        | 0.020                   |
|      | Ophthalmology consultations in all hospitals | 0.156                        | 0.018        |                         |
| 2016 | Constant                                     |                              | 0.000        | 0.039                   |
|      | Purchasing power                             | 0.207                        | 0.002        |                         |
| 2017 | Constant                                     |                              | 0.033        | 0.033                   |
|      | Purchasing power                             | 0.192                        | 0.004        |                         |
| 2018 | Constant                                     |                              | 0.085        | 0.043                   |
|      | Purchasing power                             | 0.217                        | 0.001        |                         |
